# Supplementary material for: Pulmonary function tests as outcomes for systemic sclerosis interstitial lung disease
Source: PubMed Central journal article supplement — Eur Respir Rev. 2018 May 16;27(148):170102. doi: 10.1183/16000617.0102-2017 (PMC9488607; doi:10.1183/16000617.0102-2017), 2018-05-16
Supplement: ERR-0102-2017_Supplementary_Material.pdf [file ERR-0102-2017_Supplementary_Material.pdf]

# **Pulmonary Function Tests as Outcomes for Systemic Sclerosis Interstitial Lung Disease**

Melissa Caron, Sabrina Hoa, Marie Hudson, Kevin Schwartzman, Russell Steele

## **Supplemental Material**

**e-APPENDIX 1: Detailed MEDLINE (PubMed) Search Strategy**

|                                   | AND                                          | AND                                 |
|-----------------------------------|----------------------------------------------|-------------------------------------|
| <u>Systemic Sclerosis</u>         | <u>Interstitial Lung Disease</u>             | <u>Pulmonary Function Test</u>      |
| “scleroderma, systemic”<br>[mesh] | “lung diseases,<br>interstitial”[mesh:noexp] | “lung volume<br>measurements”[mesh] |
| CREST syndrome[tw]                | “pulmonary<br>fibrosis”[mesh:noexp]          | “pulmonary gas<br>exchange”[mesh]   |
| scleroderma[tw]                   | fibrosing alveolitis[tw]                     | “pulmonary<br>ventilation”[mesh]    |
| SSc[tw]                           | ILD[tw]                                      | “spirometry”[mesh]                  |
| systemic sclerosis[tw]            | interstitial lung disease[tw]                | alveolar volume[tw]                 |
|                                   | interstitial pneumon*[tw]                    | diffusi*[tw]                        |
|                                   | lung fibrosis[tw]                            | DLCO[tw]                            |
|                                   | NSIP[tw]                                     | expiratory flow[tw]                 |
|                                   | pulmonary fibrosis[tw]                       | expiratory volume[tw]               |
|                                   | restrictive lung disease[tw]                 | FEF*[tw]                            |
|                                   | UIP[tw]                                      | FEV1[tw]                            |
|                                   |                                              | FRC[tw]                             |
|                                   |                                              | functional residual<br>capacity[tw] |
|                                   |                                              | FVC[tw]                             |
|                                   |                                              | gas exchange[tw]                    |
|                                   |                                              | KCO[tw]                             |
|                                   |                                              | lung capacity[tw]                   |
|                                   |                                              | lung function[tw]                   |
|                                   |                                              | lung test[tw]                       |
|                                   |                                              | lung volume[tw]                     |
|                                   |                                              | PEF[tw]                             |
|                                   |                                              | PFT[tw]                             |
|                                   |                                              | pulmonary function[tw]              |
|                                   |                                              | pulmonary test[tw]                  |
|                                   |                                              | respiratory function[tw]            |
|                                   |                                              | respiratory test[tw]                |
|                                   |                                              | spirometry[tw]                      |
|                                   |                                              | TLC[tw]                             |
|                                   |                                              | TLCO[tw]                            |
|                                   |                                              | transfer capacity[tw]               |
|                                   |                                              | VC[tw]                              |
|                                   |                                              | vital capacity[tw]                  |

OR

Screens: 1949 – Present

**e-APPENDIX 2: Reasons for Study Exclusion by Screening Stage**

| <b>Primary Screen: Titles and Abstracts<br/>(1,415 Excluded Records)</b> |     | <b>Secondary Screen: Full-Text Assessment<br/>(384 Excluded Records)</b> |     |
|--------------------------------------------------------------------------|-----|--------------------------------------------------------------------------|-----|
| -Duplicate                                                               | 25  | -Duplicate                                                               | 4   |
| -Not in English or in French                                             | 87  | -Not in English or in French                                             | 6   |
| -Not Original Research                                                   | 467 | -Not Original Research                                                   | 18  |
| -Unrelated to SSc-ILD                                                    | 654 | -Unrelated to/Unclear if SSc-ILD                                         | 25  |
| -Did Not Validate or Use PFTs as Outcomes in SSc-ILD                     | 51  | -Did Not Validate or Use PFTs as Outcomes in SSc-ILD                     | 86  |
| -Did Not Have a Minimum of 20 SSc Patients at Baseline                   | 131 | -Unclear which PFTs Used                                                 | 33  |
|                                                                          |     | -Did Not Have a Minimum of 20 SSc Patients at Baseline                   | 11  |
|                                                                          |     | -Did Not Focus Primarily on SSc-ILD                                      | 56  |
|                                                                          |     | -Other Reason                                                            | 11  |
|                                                                          |     | -Cross-Sectional Outcome Study                                           | 134 |

ILD: Interstitial Lung Disease; PFT: Pulmonary Function Test; SSc: Systemic Sclerosis.

**e-APPENDIX 3: Characteristics of the Outcome Studies (N = 170)**

| <b>Record</b>                | <b>Country</b> | <b>Study Design<br/>(SSc<br/>Recruitment<br/>Method/Site)</b> | <b>SSc Subjects<br/>in Study<br/>(% Female)</b> | <b>Age, Years<br/>(Range)</b> | <b>PFT Measure(s)<br/>Used</b>                                                              | <b>Main PFT<br/>Measure</b> | <b>Reason for<br/>Using<br/>Main PFT</b> |
|------------------------------|----------------|---------------------------------------------------------------|-------------------------------------------------|-------------------------------|---------------------------------------------------------------------------------------------|-----------------------------|------------------------------------------|
| Schneider et al. 1982[1]     | United States  | Cohort Study<br>(Hospital<br>Discharge<br>Records)            | 38<br>(74%<br>Female)                           | 44 (17-65)                    | DLCO Absolute,<br>FEV <sub>1</sub> Absolute,<br>FEV <sub>1</sub> /FVC,<br>FVC Absolute      | N/A                         | N/A                                      |
| Konig et al. 1984[2]         | Germany        | Cohort Study                                                  | 101                                             | N/R                           | DLCO%,<br>TLC%,<br>VC%                                                                      | DLCO%                       | Most<br>Sensitive<br>PFT                 |
| Peters-Golden et al. 1984[3] | United States  | Cohort Study<br>(Rheumatology<br>Unit)                        | 24<br>(92%<br>Female)                           | 46.1 ± 2.61<br>(19-67)        | DLCO Absolute,<br>FEV <sub>1</sub> /FVC,<br>FVC Absolute,<br>FVC%,<br>TLC Absolute,<br>TLC% | N/A                         | N/A                                      |
| Steen et al. 1985[4]         | United States  | Cohort Study<br>(Hospital<br>Records)                         | 92<br>(73%<br>Female)                           | N/R                           | DLCO%,<br>FEV <sub>1</sub> /FVC,<br>FVC%                                                    | N/A                         | N/A                                      |
| De Clerck et al. 1987[5]     | Belgium        | Cohort Study                                                  | 23                                              | 47.6 ± 10.3<br>(28-63)        | DLCOcorr%,<br>DLCOcorr/LV%,<br>FEV <sub>1</sub> /FVC,<br>TLC%                               | DLCO%                       | Most<br>Sensitive<br>PFT                 |

Abbreviations: % = Percent Predicted; DLCO = Diffusing Capacity for Carbon Monoxide; DLCO/VA = Diffusing Capacity for Carbon Monoxide Corrected for Alveolar Volume; DLCOcorr = Diffusing Capacity for Carbon Monoxide Corrected for Haemoglobin; DLCOcorr/LV% = Diffusing Capacity for Carbon Monoxide Corrected for Haemoglobin and Lung Volume; FEF<sub>25-75%</sub> = Forced Expiratory Flow over Mid-Half of FVC; FEV<sub>1</sub> = Forced Expiratory Volume in the 1<sup>st</sup> Second of Forced Exhalation; FVC = Forced Vital Capacity; ILD = Interstitial Lung Disease; N/A = Not Applicable; N/R = Not Reported; PFT = Pulmonary Function Test; RV = Residual Volume; SSc = Systemic Sclerosis; TLC = Total Lung Capacity; VC = Vital Capacity

| <b>Record</b>              | <b>Country</b> | <b>Study Design<br/>(SSc<br/>Recruitment<br/>Method/Site)</b>       | <b>SSc Subjects<br/>in Study<br/>(% Female)</b> | <b>Age, Years<br/>(Range)</b> | <b>PFT Measure(s)<br/>Used</b>                                                                                                                                                                                                                         | <b>Main PFT<br/>Measure</b> | <b>Reason for<br/>Using<br/>Main PFT</b> |
|----------------------------|----------------|---------------------------------------------------------------------|-------------------------------------------------|-------------------------------|--------------------------------------------------------------------------------------------------------------------------------------------------------------------------------------------------------------------------------------------------------|-----------------------------|------------------------------------------|
| Greenwald et al. 1987[6]   | United States  | Cohort Study<br>(Chlorambucil<br>Clinical Trial)                    | 61<br>(87%<br>Female)                           | 47 ± 12                       | DLCO Absolute,<br>DLCO%,<br>FEF <sub>25-75%</sub><br>Absolute,<br>FEF <sub>25-75%</sub> %,<br>FEV <sub>1</sub> Absolute,<br>FEV <sub>1</sub> %,<br>FEV <sub>1</sub> /FVC,<br>FRC Absolute,<br>FRC%,<br>FVC Absolute,<br>FVC%,<br>TLC Absolute,<br>TLC% | N/A                         | N/A                                      |
| McCarthy et al. 1988[7]    | Canada         | Cohort Study<br>(Rheumatic<br>Disease Unit)                         | 36<br>(75%<br>Female)                           | 48.5 ± 11<br>(23-66)          | FVC Absolute                                                                                                                                                                                                                                           | FVC<br>Absolute             | N/R                                      |
| Zarafonitis et al. 1989[8] | United States  | Cohort Study<br>(Hospital<br>Records)                               | 390                                             | N/R                           | DLCO%,<br>FVC%                                                                                                                                                                                                                                         | N/A                         | N/A                                      |
| Silver et al. 1990[9]      | United States  | Cohort Study<br>(General Clinical<br>Research Center)               | 43<br>(60%<br>Female)                           | 43.9 ± 11.6<br>(21-63.4)      | DLCO Absolute,<br>FVC Absolute                                                                                                                                                                                                                         | N/A                         | N/A                                      |
| Abramson et al. 1991[10]   | Australia      | Cohort Study<br>(Clinical Notes<br>and Lung<br>Function<br>Records) | 113<br>(81%<br>Female)                          | 50.6 ± 14<br>(16-81)          | FEV <sub>1</sub> Absolute,<br>VC Absolute                                                                                                                                                                                                              | N/A                         | N/A                                      |

Abbreviations: % = Percent Predicted; DLCO = Diffusing Capacity for Carbon Monoxide; DLCO/VA = Diffusing Capacity for Carbon Monoxide Corrected for Alveolar Volume; DLCOcorr = Diffusing Capacity for Carbon Monoxide Corrected for Haemoglobin; DLCOcorr/LV% = Diffusing Capacity for Carbon Monoxide Corrected for Haemoglobin and Lung Volume; FEF<sub>25-75%</sub> = Forced Expiratory Flow over Mid-Half of FVC; FEV<sub>1</sub> = Forced Expiratory Volume in the 1<sup>st</sup> Second of Forced Exhalation; FVC = Forced Vital Capacity; ILD = Interstitial Lung Disease; N/A = Not Applicable; N/R = Not Reported; PFT = Pulmonary Function Test; RV = Residual Volume; SSc = Systemic Sclerosis; TLC = Total Lung Capacity; VC = Vital Capacity

| <b>Record</b>              | <b>Country</b> | <b>Study Design<br/>(SSc<br/>Recruitment<br/>Method/Site)</b>               | <b>SSc Subjects<br/>in Study<br/>(% Female)</b> | <b>Age, Years<br/>(Range)</b> | <b>PFT Measure(s)<br/>Used</b>                                                          | <b>Main PFT<br/>Measure</b> | <b>Reason for<br/>Using<br/>Main PFT</b> |
|----------------------------|----------------|-----------------------------------------------------------------------------|-------------------------------------------------|-------------------------------|-----------------------------------------------------------------------------------------|-----------------------------|------------------------------------------|
| Wells et al.<br>1993[11]   | United Kingdom | Cohort Study<br>(ILD Unit)                                                  | 66<br>(76%<br>Female)                           | 50.1 ± 12.0                   | DLCO%,<br>FVC%                                                                          | N/A                         | N/A                                      |
| Wells et al.<br>1993[12]   | United Kingdom | Cohort Study<br>(Hospital<br>Records)                                       | 53<br>(74%<br>Female)                           | 49 ± 12                       | DLCO Absolute,<br>FVC Absolute                                                          | N/A                         | N/A                                      |
| Wells et al.<br>1993[13]   | United Kingdom | Cohort Study<br>(Hospital<br>Records)                                       | 35                                              | N/R                           | DLCO%,<br>FVC%                                                                          | N/A                         | N/A                                      |
| Dujic et al.<br>1994[14]   | Croatia        | Cohort Study<br>(Department of<br>Dermatology)                              | 29<br>(86%<br>Female)                           | 51.5 ± 12.7<br>(27-75)        | DLCO%                                                                                   | DLCO%                       | Previous<br>Use                          |
| Steen et al.<br>1994[15]   | United States  | Cohort Study<br>(Division of<br>Rheumatology<br>and Clinical<br>Immunology) | 890<br>(92%<br>Female)                          | 42                            | FVC Absolute,<br>FVC%                                                                   | FVC                         | Previous<br>Use                          |
| Steen et al.<br>1994[16]   | United States  | Cohort Study<br>(Hospital<br>Records)                                       | 122                                             | 45                            | DLCO%,<br>FVC Absolute,<br>FVC%                                                         | FVC                         | N/R                                      |
| Tashkin et al.<br>1994[17] | United States  | Cohort Study<br>(Chlorambucil<br>Clinical Trial)                            | 90                                              | 47 ± 11                       | DLCO Absolute,<br>DLCO%,<br>FEV <sub>1</sub> Absolute,<br>FVC Absolute,<br>TLC Absolute | N/A                         | N/A                                      |
| Behr et al.<br>1995[18]    | Germany        | Case-Control<br>Study                                                       | 43<br>(65%<br>Female)                           | 54.3 ± 3.0<br>(15-71)         | DLCO%,<br>TLC%,<br>VC%                                                                  | N/A                         | N/A                                      |

Abbreviations: % = Percent Predicted; DLCO = Diffusing Capacity for Carbon Monoxide; DLCO/VA = Diffusing Capacity for Carbon Monoxide Corrected for Alveolar Volume; DLCOcorr = Diffusing Capacity for Carbon Monoxide Corrected for Haemoglobin; DLCOcorr/LV% = Diffusing Capacity for Carbon Monoxide Corrected for Haemoglobin and Lung Volume; FEF<sub>25-75%</sub> = Forced Expiratory Flow over Mid-Half of FVC; FEV<sub>1</sub> = Forced Expiratory Volume in the 1<sup>st</sup> Second of Forced Exhalation; FVC = Forced Vital Capacity; ILD = Interstitial Lung Disease; N/A = Not Applicable; N/R = Not Reported; PFT = Pulmonary Function Test; RV = Residual Volume; SSc = Systemic Sclerosis; TLC = Total Lung Capacity; VC = Vital Capacity

| <b>Record</b>                 | <b>Country</b>    | <b>Study Design<br/>(SSc<br/>Recruitment<br/>Method/Site)</b>        | <b>SSc Subjects<br/>in Study<br/>(% Female)</b> | <b>Age, Years<br/>(Range)</b> | <b>PFT Measure(s)<br/>Used</b>                       | <b>Main PFT<br/>Measure</b> | <b>Reason for<br/>Using<br/>Main PFT</b> |
|-------------------------------|-------------------|----------------------------------------------------------------------|-------------------------------------------------|-------------------------------|------------------------------------------------------|-----------------------------|------------------------------------------|
| Behr et al.<br>1996[19]       | Germany           | Cohort Study<br>(Department of<br>Internal<br>Medicine)              | 79<br>(67%<br>Female)                           | 50.4 ± 1.2                    | DLCO%,<br>VC%                                        | N/A                         | N/A                                      |
| Jacobsen et<br>al. 1997[20]   | Denmark           | Cohort Study<br>(Participating<br>Clinical Centres<br>Chart Records) | 176<br>(85%<br>Female)                          | 41<br>(4-74)                  | DLCO%,<br>DLCO/VA%,<br>FEV <sub>1</sub> /VC%,<br>VC% | N/A                         | N/A                                      |
| Greidinger et<br>al. 1998[21] | United States     | Cohort Study<br>(Scleroderma<br>Center)                              | 101<br>(75%<br>Female)                          | 49.5 ± 13.5                   | DLCO%,<br>FEV <sub>1</sub> %,<br>FVC%                | N/A                         | N/A                                      |
| Atamas et al.<br>1999[22]     | United States     | Case-Control<br>Study<br>(Scleroderma<br>Center)                     | 37<br>(68%<br>Female)                           | 44.4 ± 13.0<br>(18-69)        | DLCO Absolute,<br>DLCO%,<br>FVC Absolute,<br>FVC%    | N/A                         | N/A                                      |
| Kon et al.<br>1999[23]        | United<br>Kingdom | Case-Control<br>Study                                                | 37<br>(89%<br>Female)                           | 49.6 ± 11.6<br>(24-79)        | FVC%                                                 | FVC%                        | N/R                                      |
| Witt et al.<br>1999[24]       | Germany           | Cohort Study<br>(Pneumological<br>Outpatient Clinic)                 | 73<br>(78%<br>Female)                           | 54.4 ± 9.6<br>(20-80)         | DLCO%,<br>FVC%,<br>TLC%                              | DLCO%                       | Validation                               |
| White et al.<br>2000[25]      | United States     | Cohort Study<br>(Scleroderma<br>Center)                              | 103<br>(69%<br>Female)                          | 48<br>(30-59)                 | DLCO Absolute,<br>DLCO%,<br>FVC Absolute,<br>FVC%    | N/A                         | N/A                                      |
| Yuhara et al.<br>2000[26]     | Japan             | Cohort Study<br>(Hospital<br>Records)                                | 24<br>(96%<br>Female)                           | 36.7 ± 10.6                   | DLCO%,<br>DLCO/VA%,<br>FVC%                          | N/A                         | N/A                                      |

Abbreviations: % = Percent Predicted; DLCO = Diffusing Capacity for Carbon Monoxide; DLCO/VA = Diffusing Capacity for Carbon Monoxide Corrected for Alveolar Volume; DLCOcorr = Diffusing Capacity for Carbon Monoxide Corrected for Haemoglobin; DLCOcorr/LV% = Diffusing Capacity for Carbon Monoxide Corrected for Haemoglobin and Lung Volume; FEF<sub>25-75%</sub> = Forced Expiratory Flow over Mid-Half of FVC; FEV<sub>1</sub> = Forced Expiratory Volume in the 1<sup>st</sup> Second of Forced Exhalation; FVC = Forced Vital Capacity; ILD = Interstitial Lung Disease; N/A = Not Applicable; N/R = Not Reported; PFT = Pulmonary Function Test; RV = Residual Volume; SSc = Systemic Sclerosis; TLC = Total Lung Capacity; VC = Vital Capacity

| <b>Record</b>                  | <b>Country</b> | <b>Study Design (SSc Recruitment Method/Site)</b>   | <b>SSc Subjects in Study (% Female)</b> | <b>Age, Years (Range)</b> | <b>PFT Measure(s) Used</b>                                                  | <b>Main PFT Measure</b> | <b>Reason for Using Main PFT</b> |
|--------------------------------|----------------|-----------------------------------------------------|-----------------------------------------|---------------------------|-----------------------------------------------------------------------------|-------------------------|----------------------------------|
| Marie et al. 2001[27]          | France         | Cohort Study (Hospital Records)                     | 43 (86% Female)                         | 59 (33-79)                | DLCO%, FEV <sub>1</sub> %, FEV <sub>1</sub> /VC%, FRC%, FVC%, RV%, TLC% VC% | N/A                     | N/A                              |
| Scorza et al. 2001[28]         | Italy          | Experimental Study (Outpatient Clinic)              | 46 (85% Female)                         | 53 (25-75)                | DLCO%, FEV <sub>1</sub> %, VC%                                              | N/A                     | N/A                              |
| Bouros et al. 2002[29]         | United Kingdom | Cohort Study (Hospital Records)                     | 80                                      | N/R                       | DLCO%, FVC%                                                                 | N/A                     | N/A                              |
| Giacomelli et al. 2002[30]     | Italy          | Cohort Study (Outpatient Clinic Centers)            | 23 (83% Female)                         | 57.3 (39-67)              | DLCO%, FEV <sub>1</sub> %, FVC%                                             | N/A                     | N/A                              |
| Pakas et al. 2002[31]          | Greece         | Experimental Study (Rheumatology Outpatient Clinic) | 28 (82% Female)                         | 48.3                      | DLCO%, FVC%, TLC%                                                           | N/A                     | N/A                              |
| Kowal-Bielecka et al. 2003[32] | Poland         | Case-Control Study                                  | 30 (100% Female)                        | 46 (24-62)                | FVC%                                                                        | FVC%                    | N/R                              |
| Yanaba et al. 2003[33]         | Japan          | Case-Control Study                                  | 39 (85% Female)                         | 49 (2-72)                 | DLCO%, VC%                                                                  | N/A                     | N/A                              |

Abbreviations: % = Percent Predicted; DLCO = Diffusing Capacity for Carbon Monoxide; DLCO/VA = Diffusing Capacity for Carbon Monoxide Corrected for Alveolar Volume; DLCOcorr = Diffusing Capacity for Carbon Monoxide Corrected for Haemoglobin; DLCOcorr/LV% = Diffusing Capacity for Carbon Monoxide Corrected for Haemoglobin and Lung Volume; FEF<sub>25-75%</sub> = Forced Expiratory Flow over Mid-Half of FVC; FEV<sub>1</sub> = Forced Expiratory Volume in the 1<sup>st</sup> Second of Forced Exhalation; FVC = Forced Vital Capacity; ILD = Interstitial Lung Disease; N/A = Not Applicable; N/R = Not Reported; PFT = Pulmonary Function Test; RV = Residual Volume; SSc = Systemic Sclerosis; TLC = Total Lung Capacity; VC = Vital Capacity



| <b>Record</b>                  | <b>Country</b>        | <b>Study Design (SSc Recruitment Method/Site)</b>                     | <b>SSc Subjects in Study (% Female)</b> | <b>Age, Years (Range)</b> | <b>PFT Measure(s) Used</b>                                               | <b>Main PFT Measure</b> | <b>Reason for Using Main PFT</b> |
|--------------------------------|-----------------------|-----------------------------------------------------------------------|-----------------------------------------|---------------------------|--------------------------------------------------------------------------|-------------------------|----------------------------------|
| Airo et al. 2004[34]           | Italy, United Kingdom | Individual Patient Data Meta-Analysis                                 | 53                                      | N/R                       | DLCO%, FVC%                                                              | N/A                     | N/A                              |
| Yanaba et al. 2004[35]         | Japan                 | Case-Control Study                                                    | 42 (86% Female)                         | 49 ± 18                   | DLCO%, VC%                                                               | N/A                     | N/A                              |
| De Santis et al. 2005[36]      | Italy                 | Cohort Study (Outpatient Clinic of the Division of Rheumatology)      | 100 (92% Female)                        | 55.4 ± 11.9               | DLCO%, FVC%                                                              | N/A                     | N/A                              |
| Kodera et al. 2005[37]         | Japan                 | Case-Control Study                                                    | 123 (86% Female)                        | 51 ± 14                   | DLCO%, VC%                                                               | N/A                     | N/A                              |
| Kowal-Bielecka et al. 2005[38] | Poland                | Cohort Study                                                          | 21 (100% Female)                        | 52 (25–66)                | FVC%                                                                     | FVC%                    | N/R                              |
| Hoyle et al. 2006[39]          | United Kingdom        | Experimental Study (Fibrosing Alveolitis in Scleroderma Trial (FAST)) | 45 (71% Female)                         | 55 (18-75)                | DLCO%<br>DLCO/VA%,<br>DLCOcorr%,<br>FEV <sub>1</sub> %,<br>FVC%,<br>TLC% | N/A                     | N/A                              |
| Plastiras et al. 2006[40]      | Greece                | Cohort Study (Outpatient University Rheumatology Clinic)              | 78 (85% Female)                         | 45.9 ± 13.5               | DLCO%, FVC%                                                              | FVC%                    | Previous Use                     |

Abbreviations: % = Percent Predicted; DLCO = Diffusing Capacity for Carbon Monoxide; DLCO/VA = Diffusing Capacity for Carbon Monoxide Corrected for Alveolar Volume; DLCOcorr = Diffusing Capacity for Carbon Monoxide Corrected for Haemoglobin; DLCOcorr/LV% = Diffusing Capacity for Carbon Monoxide Corrected for Haemoglobin and Lung Volume; FEF<sub>25-75%</sub> = Forced Expiratory Flow over Mid-Half of FVC; FEV<sub>1</sub> = Forced Expiratory Volume in the 1<sup>st</sup> Second of Forced Exhalation; FVC = Forced Vital Capacity; ILD = Interstitial Lung Disease; N/A = Not Applicable; N/R = Not Reported; PFT = Pulmonary Function Test; RV = Residual Volume; SSc = Systemic Sclerosis; TLC = Total Lung Capacity; VC = Vital Capacity

| <b>Record</b>            | <b>Country</b> | <b>Study Design (SSc Recruitment Method/Site)</b>                                  | <b>SSc Subjects in Study (% Female)</b> | <b>Age, Years (Range)</b> | <b>PFT Measure(s) Used</b>             | <b>Main PFT Measure</b> | <b>Reason for Using Main PFT</b> |
|--------------------------|----------------|------------------------------------------------------------------------------------|-----------------------------------------|---------------------------|----------------------------------------|-------------------------|----------------------------------|
| Tashkin et al. 2006[41]  | United States  | Experimental Study (Scleroderma Lung Study I (SLS I))                              | 158 (70% Female)                        | 47.9 ± 1.0 (19.6-83.1)    | DLCO%, DLCO/VA%, FVC%, TLC%            | FVC%                    | Previous Use                     |
| Beretta et al. 2007[42]  | Italy          | Case-Control Study (Outpatient Clinical Immunology and Allergology Clinic)         | 204 (91% Female)                        | 48.6 ± 13.2 (16-75)       | FVC%                                   | FVC%                    | N/R                              |
| Beretta et al. 2007[43]  | Italy          | Cohort Study (Outpatient Allergology, Clinical Immunology and Rheumatology Clinic) | 33 (79% Female)                         | 49.7 ± 10.4               | DLCO Absolute, DLCO%, VC Absolute, VC% | N/A                     | N/A                              |
| Clements et al. 2007[44] | United States  | Cohort Study (Scleroderma Lung Study I (SLS I))                                    | 158 (70% Female)                        | 48 ± 13                   | DLCO%, FEV <sub>1</sub> %, FVC%, TLC%  | N/A                     | N/A                              |
| Goh et al. 2007[45]      | United Kingdom | Cohort Study (ILD Unit)                                                            | 141 (81% Female)                        | 47.3 ± 12.2               | DLCO%, FVC%                            | N/A                     | N/A                              |

Abbreviations: % = Percent Predicted; DLCO = Diffusing Capacity for Carbon Monoxide; DLCO/VA = Diffusing Capacity for Carbon Monoxide Corrected for Alveolar Volume; DLCOcorr = Diffusing Capacity for Carbon Monoxide Corrected for Haemoglobin; DLCOcorr/LV% = Diffusing Capacity for Carbon Monoxide Corrected for Haemoglobin and Lung Volume; FEF<sub>25-75%</sub> = Forced Expiratory Flow over Mid-Half of FVC; FEV<sub>1</sub> = Forced Expiratory Volume in the 1<sup>st</sup> Second of Forced Exhalation; FVC = Forced Vital Capacity; ILD = Interstitial Lung Disease; N/A = Not Applicable; N/R = Not Reported; PFT = Pulmonary Function Test; RV = Residual Volume; SSc = Systemic Sclerosis; TLC = Total Lung Capacity; VC = Vital Capacity

| <b>Record</b>            | <b>Country</b> | <b>Study Design (SSc Recruitment Method/Site)</b>                | <b>SSc Subjects in Study (% Female)</b> | <b>Age, Years (Range)</b> | <b>PFT Measure(s) Used</b>               | <b>Main PFT Measure</b> | <b>Reason for Using Main PFT</b> |
|--------------------------|----------------|------------------------------------------------------------------|-----------------------------------------|---------------------------|------------------------------------------|-------------------------|----------------------------------|
| Mittoo et al. 2007[46]   | United States  | Cohort Study (Scleroderma Center)                                | 25 (64% Women)                          | 43.5 ± 12.5 (16-67)       | DLCO Absolute, DLCO%, FVC Absolute, FVC% | N/A                     | N/A                              |
| Tashkin et al. 2007[47]  | United States  | Cohort Study (Scleroderma Lung Study I (SLS I))                  | 145 (70% Female)                        | 47.9 ± 1.0                | DLCO%, DLCO/VA%, FVC%, TLC%              | FVC%                    | Previous Use                     |
| Tzelepis et al. 2007[48] | Greece         | Cohort Study (University Rheumatology Clinic)                    | 59 (81% Female)                         | 47.5 ± 13.9               | FVC%                                     | FVC%                    | Previous Use                     |
| Berezne et al. 2008[49]  | France         | Cohort Study (National Reference Centers for Systemic Sclerosis) | 27 (74% Female)                         | 49.4 ± 15                 | DLCO%, FVC%, TLC%                        | N/A                     | N/A                              |
| Boin et al. 2008[50]     | United States  | Case-Control Study (Scleroderma Center)                          | 62 (84% Female)                         | 51.1                      | FVC%                                     | FVC%                    | N/R                              |
| Goh et al. 2008[51]      | United Kingdom | Cohort Study (Hospital Records)                                  | 215 (81% Female)                        | 49.1 ± 13.0               | DLCO%, FVC%                              | N/A                     | N/A                              |
| Strange et al. 2008[52]  | United States  | Cohort Study (Scleroderma Lung Study I (SLS I))                  | 141 (72% Female)                        | 48.6 ± 12.0               | FVC%                                     | FVC%                    | Previous Use                     |

Abbreviations: % = Percent Predicted; DLCO = Diffusing Capacity for Carbon Monoxide; DLCO/VA = Diffusing Capacity for Carbon Monoxide Corrected for Alveolar Volume; DLCOcorr = Diffusing Capacity for Carbon Monoxide Corrected for Haemoglobin; DLCOcorr/LV% = Diffusing Capacity for Carbon Monoxide Corrected for Haemoglobin and Lung Volume; FEF<sub>25-75%</sub> = Forced Expiratory Flow over Mid-Half of FVC; FEV<sub>1</sub> = Forced Expiratory Volume in the 1<sup>st</sup> Second of Forced Exhalation; FVC = Forced Vital Capacity; ILD = Interstitial Lung Disease; N/A = Not Applicable; N/R = Not Reported; PFT = Pulmonary Function Test; RV = Residual Volume; SSc = Systemic Sclerosis; TLC = Total Lung Capacity; VC = Vital Capacity

| <b>Record</b>                       | <b>Country</b> | <b>Study Design (SSc Recruitment Method/Site)</b>                                 | <b>SSc Subjects in Study (% Female)</b> | <b>Age, Years (Range)</b> | <b>PFT Measure(s) Used</b>      | <b>Main PFT Measure</b> | <b>Reason for Using Main PFT</b> |
|-------------------------------------|----------------|-----------------------------------------------------------------------------------|-----------------------------------------|---------------------------|---------------------------------|-------------------------|----------------------------------|
| Assassi et al. 2009[53] (Abstract)  | United States  | Cohort Study                                                                      | 36                                      | N/R                       | FVC%                            | FVC%                    | N/R                              |
| De Souza et al. 2009[54]            | Brazil         | Cohort Study (Hospital Records)                                                   | 28 (100% Female)                        | 44.89 ± 8.74              | DLCO%, FEV <sub>1</sub> %, FVC% | N/A                     | N/A                              |
| Gordon et al. 2009[55] (Abstract)   | United States  | Experimental Study                                                                | 30                                      | N/R                       | DLCO%, FVC%                     | N/A                     | N/A                              |
| Khanna et al. 2009[56]              | United States  | Cohort Study (Scleroderma Lung Study I (SLS I))                                   | 158 (71% Female)                        | 48.5 ± 12.3               | FVC%                            | FVC%                    | Previous Use                     |
| Ottewell et al. 2009[57] (Abstract) | United Kingdom | Cohort Study                                                                      | 22 (91% Female)                         | 56 (31-79)                | DLCO%, VC%                      | N/A                     | N/A                              |
| Schmidt et al. 2009[58]             | Germany        | Case-Control Study                                                                | 32 (72% Female)                         | 58.5 (30-72)              | DLCO%, FVC%, TLC%               | N/A                     | N/A                              |
| Wanchu et al. 2009[59]              | India          | Cohort Study (Rheumatology Clinic)                                                | 36 (94% Female)                         | 37.5 ± 10.5               | DLCO%, FVC Absolute, FVC%       | N/A                     | N/A                              |
| Assassi et al. 2010[60]             | United States  | Cohort Study (Genetics versus Environment in Scleroderma Outcome Study (GENISOS)) | 266 (80% Female)                        | 48.63 ± 13.5              | FVC%                            | FVC%                    | Validation                       |

Abbreviations: % = Percent Predicted; DLCO = Diffusing Capacity for Carbon Monoxide; DLCO/VA = Diffusing Capacity for Carbon Monoxide Corrected for Alveolar Volume; DLCOcorr = Diffusing Capacity for Carbon Monoxide Corrected for Haemoglobin; DLCOcorr/LV% = Diffusing Capacity for Carbon Monoxide Corrected for Haemoglobin and Lung Volume; FEF<sub>25-75%</sub> = Forced Expiratory Flow over Mid-Half of FVC; FEV<sub>1</sub> = Forced Expiratory Volume in the 1<sup>st</sup> Second of Forced Exhalation; FVC = Forced Vital Capacity; ILD = Interstitial Lung Disease; N/A = Not Applicable; N/R = Not Reported; PFT = Pulmonary Function Test; RV = Residual Volume; SSc = Systemic Sclerosis; TLC = Total Lung Capacity; VC = Vital Capacity

| <b>Record</b>                            | <b>Country</b> | <b>Study Design<br/>(SSc<br/>Recruitment<br/>Method/Site)</b>         | <b>SSc Subjects<br/>in Study<br/>(% Female)</b> | <b>Age, Years<br/>(Range)</b> | <b>PFT Measure(s)<br/>Used</b> | <b>Main PFT<br/>Measure</b> | <b>Reason for<br/>Using<br/>Main PFT</b> |
|------------------------------------------|----------------|-----------------------------------------------------------------------|-------------------------------------------------|-------------------------------|--------------------------------|-----------------------------|------------------------------------------|
| Boin et al.<br>2010[61]<br>(Abstract)    | United States  | Cohort Study                                                          | 22                                              | N/R                           | FVC%                           | FVC%                        | N/R                                      |
| Colaci et al.<br>2010[62]                | Italy          | Cohort Study<br>(Rheumatology<br>Unit)                                | 26<br>(77%<br>Female)                           | 47.8 ± 10.5                   | DLCOcorr%,<br>FVC%             | N/A                         | N/A                                      |
| Cuomo et al.<br>2010[63]<br>(Abstract)   | Italy          | Cohort Study                                                          | 20<br>(90%<br>Female)                           | 46<br>(18-57)                 | DLCO%,<br>FVC%                 | N/A                         | N/A                                      |
| Gilson et al.<br>2010[64]                | France         | Cohort Study<br>(Department of<br>Rheumatology)                       | 105<br>(86%<br>Female)                          | 52.7 ± 11.8                   | DLCO%,<br>FVC%                 | FVC%                        | Previous<br>Use                          |
| Mittoo et al.<br>2010[65]<br>(Abstract)  | Canada         | Cohort Study<br>(Canadian<br>Scleroderma<br>Research Group<br>(CSRG)) | 67<br>(88%<br>Female)                           | 54.5 ± 12.1                   | DLCO%,<br>FVC%                 | FVC%                        | N/R                                      |
| Schorr et al.<br>2010[66]<br>(Abstract)  | United States  | Cohort Study<br>(Scleroderma<br>Specialty Center<br>Database)         | 91                                              | N/R                           | FVC%                           | FVC%                        | N/R                                      |
| Seibold et al.<br>2010[67]               | United States  | Experimental<br>Study                                                 | 152<br>(74%<br>Female)                          | 52.5<br>(15-80)               | DLCO%,<br>FVC%                 | N/A                         | N/A                                      |
| Shahane et<br>al. 2010[68]<br>(Abstract) | United States  | Cohort Study<br>(Clinic<br>Scleroderma<br>Database)                   | 133                                             | N/R                           | DLCO,<br>FVC                   | N/A                         | N/A                                      |

Abbreviations: % = Percent Predicted; DLCO = Diffusing Capacity for Carbon Monoxide; DLCO/VA = Diffusing Capacity for Carbon Monoxide Corrected for Alveolar Volume; DLCOcorr = Diffusing Capacity for Carbon Monoxide Corrected for Haemoglobin; DLCOcorr/LV% = Diffusing Capacity for Carbon Monoxide Corrected for Haemoglobin and Lung Volume; FEF<sub>25-75%</sub> = Forced Expiratory Flow over Mid-Half of FVC; FEV<sub>1</sub> = Forced Expiratory Volume in the 1<sup>st</sup> Second of Forced Exhalation; FVC = Forced Vital Capacity; ILD = Interstitial Lung Disease; N/A = Not Applicable; N/R = Not Reported; PFT = Pulmonary Function Test; RV = Residual Volume; SSc = Systemic Sclerosis; TLC = Total Lung Capacity; VC = Vital Capacity

| <b>Record</b>                    | <b>Country</b> | <b>Study Design (SSc Recruitment Method/Site)</b>                   | <b>SSc Subjects in Study (% Female)</b> | <b>Age, Years (Range)</b> | <b>PFT Measure(s) Used</b>               | <b>Main PFT Measure</b> | <b>Reason for Using Main PFT</b> |
|----------------------------------|----------------|---------------------------------------------------------------------|-----------------------------------------|---------------------------|------------------------------------------|-------------------------|----------------------------------|
| Steen et al. 2010[69] (Abstract) | United States  | Cohort Study                                                        | 1,029                                   | N/R                       | DLCO%, FVC%                              | N/A                     | N/A                              |
| Theodore et al. 2010[70]         | United States  | Cohort Study                                                        | 24                                      | N/R                       | FVC                                      | FVC                     | Previous Use                     |
| Abhishek et al. 2011[71]         | United Kingdom | Cohort Study (Rheumatology Day-Case Unit Databases)                 | 36 (75% Female)                         | 54.26 ± 14.03             | DLCO Absolute, FVC Absolute              | N/A                     | N/A                              |
| De Santis et al. 2011[72]        | Italy          | Case-Control Study (Outpatient Clinic of Rheumatology Division)     | 46 (78% Female)                         | 55.1 ± 14                 | DLCO%, FVC%                              | N/A                     | N/A                              |
| Espinosa et al. 2011[73]         | Spain          | Cohort Study (Autoimmune Disease and Internal Medicine Departments) | 37 (81% Female)                         | 43.0 ± 12.4               | DLCO%, FVC%                              | N/A                     | N/A                              |
| Goh et al. 2011[74]              | United Kingdom | Cohort Study                                                        | 168 (82% Female)                        | 49.5 ± 13.2               | DLCO Absolute, DLCO%, FVC Absolute, FVC% | N/A                     | N/A                              |
| Hasegawa et al. 2011[75]         | Japan          | Case-Control Study                                                  | 92 (87% Female)                         | 52.3 ± 13.5               | DLCO%, VC%                               | N/A                     | N/A                              |

Abbreviations: % = Percent Predicted; DLCO = Diffusing Capacity for Carbon Monoxide; DLCO/VA = Diffusing Capacity for Carbon Monoxide Corrected for Alveolar Volume; DLCOcorr = Diffusing Capacity for Carbon Monoxide Corrected for Haemoglobin; DLCOcorr/LV% = Diffusing Capacity for Carbon Monoxide Corrected for Haemoglobin and Lung Volume; FEF<sub>25-75%</sub> = Forced Expiratory Flow over Mid-Half of FVC; FEV<sub>1</sub> = Forced Expiratory Volume in the 1<sup>st</sup> Second of Forced Exhalation; FVC = Forced Vital Capacity; ILD = Interstitial Lung Disease; N/A = Not Applicable; N/R = Not Reported; PFT = Pulmonary Function Test; RV = Residual Volume; SSc = Systemic Sclerosis; TLC = Total Lung Capacity; VC = Vital Capacity

| <b>Record</b>                        | <b>Country</b> | <b>Study Design (SSc Recruitment Method/Site)</b>             | <b>SSc Subjects in Study (% Female)</b> | <b>Age, Years (Range)</b> | <b>PFT Measure(s) Used</b>               | <b>Main PFT Measure</b> | <b>Reason for Using Main PFT</b> |
|--------------------------------------|----------------|---------------------------------------------------------------|-----------------------------------------|---------------------------|------------------------------------------|-------------------------|----------------------------------|
| Hoshino et al. 2011[76]              | Japan          | Case-Control Study (Hospital Records)                         | 314 (88% Female)                        | 44.9                      | FVC%                                     | FVC%                    | N/R                              |
| Jayaweera et al. 2011[77] (Abstract) | Australia      | Cohort Study (Australia Scleroderma Interest Group (ASIG))    | 43                                      | N/R                       | DLCO%, FVC%                              | N/A                     | N/A                              |
| Khanna et al. 2011[78]               | United States  | Experimental Study                                            | 20 (65% Female)                         | 46.1 ± 14.2               | DLCO%, FVC%, TLC%                        | N/A                     | N/A                              |
| Khanna et al. 2011[79]               | United States  | Cohort Study (Scleroderma Lung Study I (SLS I) Placebo Group) | 77 (62% Female)                         | 48.3 ± 12.5               | DLCO%, FVC%                              | N/A                     | N/A                              |
| Mittoo et al. 2011[80]               | United States  | Cohort Study (Scleroderma Center Database)                    | 38 (68% Female)                         | 44.3 ± 11.4 (21-74)       | DLCO%, FVC%                              | N/A                     | N/A                              |
| Poormoghim et al. 2011[81]           | Iran           | Cohort Study (Rheumatology Clinic)                            | 91 (93% Female)                         | 44.10 ± 14.88             | DLCO%, FVC%                              | N/A                     | N/A                              |
| Rosato et al. 2011[82]               | Italy          | Cohort Study (Clinical Immunology Unit-Scleroderma Center)    | 41 (90% Female)                         | 47.5 (23-70)              | DLCOcorr%, FEV <sub>1</sub> %, TLC%, VC% | DLCOcorr%               | N/R                              |

Abbreviations: % = Percent Predicted; DLCO = Diffusing Capacity for Carbon Monoxide; DLCO/VA = Diffusing Capacity for Carbon Monoxide Corrected for Alveolar Volume; DLCOcorr = Diffusing Capacity for Carbon Monoxide Corrected for Haemoglobin; DLCOcorr/LV% = Diffusing Capacity for Carbon Monoxide Corrected for Haemoglobin and Lung Volume; FEF<sub>25-75%</sub> = Forced Expiratory Flow over Mid-Half of FVC; FEV<sub>1</sub> = Forced Expiratory Volume in the 1<sup>st</sup> Second of Forced Exhalation; FVC = Forced Vital Capacity; ILD = Interstitial Lung Disease; N/A = Not Applicable; N/R = Not Reported; PFT = Pulmonary Function Test; RV = Residual Volume; SSc = Systemic Sclerosis; TLC = Total Lung Capacity; VC = Vital Capacity

| <b>Record</b>                           | <b>Country</b> | <b>Study Design (SSc Recruitment Method/Site)</b>         | <b>SSc Subjects in Study (% Female)</b> | <b>Age, Years (Range)</b> | <b>PFT Measure(s) Used</b> | <b>Main PFT Measure</b> | <b>Reason for Using Main PFT</b> |
|-----------------------------------------|----------------|-----------------------------------------------------------|-----------------------------------------|---------------------------|----------------------------|-------------------------|----------------------------------|
| Roth et al. 2011[83]                    | United States  | Cohort Study (Scleroderma Lung Study I (SLS I))           | 112 (71% Female)                        | 46.9 ± 0.9                | FVC%                       | FVC%                    | Previous Use                     |
| Tiev et al. 2011[84]                    | France         | Cohort Study                                              | 83 (88% Female)                         | 53.5 ± 12.2               | FVC%, TLC%                 | N/A                     | N/A                              |
| Volpinari et al. 2011[85]               | Italy          | Cohort Study                                              | 79 (90% Female)                         | 55 ± 13                   | DLCO%, FVC%                | N/A                     | N/A                              |
| Abignano et al. 2012[86] (Abstract)     | United Kingdom | Cohort Study (Medical Records)                            | 45                                      | N/R                       | DLCO%, FVC%                | N/A                     | N/A                              |
| De Santis et al. 2012[87]               | Italy          | Cohort Study (Outpatient Clinic of Rheumatology Division) | 110 (87% Female)                        | 54.9 ± 12.6               | DLCO%, FVC%                | N/A                     | N/A                              |
| Hesselstrand et al. 2012[88]            | Sweden         | Cohort Study (SSc Cohort)                                 | 244                                     | N/R                       | VC%                        | VC%                     | N/R                              |
| Kishore Babu et al. 2012[89] (Abstract) | India          | Cohort Study (Discharge Summaries)                        | 23 (78% Female)                         | 35.9 ± 4.5                | FVC%                       | FVC%                    | N/R                              |
| Kuwana et al. 2012[90] (Abstract)       | Japan          | Cohort Study (Institutional SSc Database)                 | 50                                      | N/R                       | FVC%                       | FVC%                    | N/R                              |

Abbreviations: % = Percent Predicted; DLCO = Diffusing Capacity for Carbon Monoxide; DLCO/VA = Diffusing Capacity for Carbon Monoxide Corrected for Alveolar Volume; DLCOcorr = Diffusing Capacity for Carbon Monoxide Corrected for Haemoglobin; DLCOcorr/LV% = Diffusing Capacity for Carbon Monoxide Corrected for Haemoglobin and Lung Volume; FEF<sub>25-75%</sub> = Forced Expiratory Flow over Mid-Half of FVC; FEV<sub>1</sub> = Forced Expiratory Volume in the 1<sup>st</sup> Second of Forced Exhalation; FVC = Forced Vital Capacity; ILD = Interstitial Lung Disease; N/A = Not Applicable; N/R = Not Reported; PFT = Pulmonary Function Test; RV = Residual Volume; SSc = Systemic Sclerosis; TLC = Total Lung Capacity; VC = Vital Capacity



| <b>Record</b>                                   | <b>Country</b> | <b>Study Design<br/>(SSc<br/>Recruitment<br/>Method/Site)</b> | <b>SSc Subjects<br/>in Study<br/>(% Female)</b> | <b>Age, Years<br/>(Range)</b> | <b>PFT Measure(s)<br/>Used</b> | <b>Main PFT<br/>Measure</b> | <b>Reason for<br/>Using<br/>Main PFT</b> |
|-------------------------------------------------|----------------|---------------------------------------------------------------|-------------------------------------------------|-------------------------------|--------------------------------|-----------------------------|------------------------------------------|
| Kuwana et al.<br>2012[91]<br>(Abstract)         | Japan          | Cohort Study<br>(Institutional SSc<br>Database)               | 50                                              | N/R                           | FVC%                           | FVC%                        | N/R                                      |
| Le Gouellec<br>et al.<br>2012[92]<br>(Abstract) | France         | Cohort Study                                                  | 75                                              | N/R                           | DLCO%,<br>FVC%                 | N/A                         | N/A                                      |
| Schupp et al.<br>2012[93]<br>(Abstract)         | Germany        | Cohort Study                                                  | 126                                             | N/R                           | FVC%                           | FVC%                        | N/R                                      |
| Sfriso et al.<br>2012[94]                       | Italy          | Case-Control<br>Study<br>(Rheumatology<br>Unit)               | 32<br>(100%<br>Female)                          | 55.1 ± 9.2<br>(45.6-67.4)     | DLCO%,<br>FVC%                 | N/A                         | N/A                                      |
| Soriano et al.<br>2012[95]<br>(Abstract)        | Italy          | Cohort Study                                                  | 31                                              | N/R                           | FEV <sub>1</sub> %,<br>TLC%    | N/A                         | N/A                                      |
| Tiev et al.<br>2012[96]                         | France         | Cohort Study<br>(Department of<br>Internal<br>Medicine)       | 105<br>(88%<br>Female)                          | 54.8 ± 12.9                   | FVC%,<br>TLC%                  | N/A                         | N/A                                      |
| Ananyeva et<br>al. 2013[97]<br>(Abstract)       | Russia         | Cohort Study                                                  | 27<br>(96%<br>Female)                           | 45                            | DLCO%,<br>FVC%                 | N/A                         | N/A                                      |

Abbreviations: % = Percent Predicted; DLCO = Diffusing Capacity for Carbon Monoxide; DLCO/VA = Diffusing Capacity for Carbon Monoxide Corrected for Alveolar Volume; DLCOcorr = Diffusing Capacity for Carbon Monoxide Corrected for Haemoglobin; DLCOcorr/LV% = Diffusing Capacity for Carbon Monoxide Corrected for Haemoglobin and Lung Volume; FEF<sub>25-75%</sub> = Forced Expiratory Flow over Mid-Half of FVC; FEV<sub>1</sub> = Forced Expiratory Volume in the 1<sup>st</sup> Second of Forced Exhalation; FVC = Forced Vital Capacity; ILD = Interstitial Lung Disease; N/A = Not Applicable; N/R = Not Reported; PFT = Pulmonary Function Test; RV = Residual Volume; SSc = Systemic Sclerosis; TLC = Total Lung Capacity; VC = Vital Capacity

| <b>Record</b>                | <b>Country</b>        | <b>Study Design (SSc Recruitment Method/Site)</b>                                       | <b>SSc Subjects in Study (% Female)</b> | <b>Age, Years (Range)</b> | <b>PFT Measure(s) Used</b> | <b>Main PFT Measure</b> | <b>Reason for Using Main PFT</b> |
|------------------------------|-----------------------|-----------------------------------------------------------------------------------------|-----------------------------------------|---------------------------|----------------------------|-------------------------|----------------------------------|
| Ando et al. 2013[98]         | Japan                 | Cohort Study (Department of Respiratory Medicine at Tertiary Care Center)               | 71 (82% Female)                         | 58.2 ± 13.9               | FVC%                       | FVC%                    | Previous Use                     |
| Burt et al. 2013[99]         | Brazil, United States | Cohort Study (Previous Study or Compassionate Basis)                                    | 90 (81% Female)                         | 42 (16-71)                | DLCOcorr%, FVC%, TLC%      | N/A                     | N/A                              |
| Celeste et al. 2013[100]     | Italy                 | Cohort Study (Outpatient Clinic Referral Center for Systemic Autoimmune Diseases)       | 221 (90% Female)                        | 45.5                      | DLCO%, FVC%                | N/A                     | N/A                              |
| De Lauretis et al. 2013[101] | United Kingdom        | Case-Control Study (Interstitial Lung Disease Unit)                                     | 286 (78% Female)                        | 51.0                      | DLCO%, FVC%                | N/A                     | N/A                              |
| Elhaj et al. 2013[102]       | United States         | Case-Control Study (Genetics versus Environment in Scleroderma Outcome Study (GENISOS)) | 266 (83% Female)                        | 48.6 ± 13.5               | DLCOcorr%, FVC%            | FVC%                    | Validation                       |

Abbreviations: % = Percent Predicted; DLCO = Diffusing Capacity for Carbon Monoxide; DLCO/VA = Diffusing Capacity for Carbon Monoxide Corrected for Alveolar Volume; DLCOcorr = Diffusing Capacity for Carbon Monoxide Corrected for Haemoglobin; DLCOcorr/LV% = Diffusing Capacity for Carbon Monoxide Corrected for Haemoglobin and Lung Volume; FEF<sub>25-75%</sub> = Forced Expiratory Flow over Mid-Half of FVC; FEV<sub>1</sub> = Forced Expiratory Volume in the 1<sup>st</sup> Second of Forced Exhalation; FVC = Forced Vital Capacity; ILD = Interstitial Lung Disease; N/A = Not Applicable; N/R = Not Reported; PFT = Pulmonary Function Test; RV = Residual Volume; SSc = Systemic Sclerosis; TLC = Total Lung Capacity; VC = Vital Capacity

| <b>Record</b>                          | <b>Country</b> | <b>Study Design (SSc Recruitment Method/Site)</b>                                       | <b>SSc Subjects in Study (% Female)</b> | <b>Age, Years (Range)</b> | <b>PFT Measure(s) Used</b>        | <b>Main PFT Measure</b> | <b>Reason for Using Main PFT</b> |
|----------------------------------------|----------------|-----------------------------------------------------------------------------------------|-----------------------------------------|---------------------------|-----------------------------------|-------------------------|----------------------------------|
| Engelmayer et al. 2013[103] (Abstract) | Argentina      | Cohort Study                                                                            | 24                                      | N/R                       | DLCO Absolute, FVC Absolute, FVC% | N/A                     | N/A                              |
| Koneva et al. 2013[104] (Abstract)     | Russia         | Cohort Study (Institute of Rheumatology)                                                | 44 (93% Female)                         | 49 ± 13                   | DLCO%, FVC%                       | N/A                     | N/A                              |
| Liu et al. 2013[105]                   | United States  | Case-Control Study (Genetics versus Environment in Scleroderma Outcome Study (GENISOS)) | 266 (83% Female)                        | 48.6 ± 13.5               | FVC%                              | FVC%                    | Validation                       |
| Panopoulos et al. 2013[106]            | Greece         | Case-Control Study (Department of Therapeutics)                                         | 26 (92% Female)                         | 47.1                      | DLCO%, FVC%, TLC%                 | N/A                     | N/A                              |
| Radic et al. 2013[107] (Abstract)      | Germany        | Cohort Study                                                                            | 153                                     | N/R                       | DLCO%, FVC%                       | N/A                     | N/A                              |
| Stock et al. 2013[108]                 | United Kingdom | Case-Control Study (Tertiary Referral Centre Clinics)                                   | 440 (81% Female)                        | 52.8 (15-83)              | DLCO%, FVC%                       | N/A                     | N/A                              |
| Vacca et al. 2013[109] (Abstract)      | Italy          | Cohort Study (Rheumatology Unit)                                                        | 22                                      | N/R                       | DLCO%, FVC%                       | N/A                     | N/A                              |

Abbreviations: % = Percent Predicted; DLCO = Diffusing Capacity for Carbon Monoxide; DLCO/VA = Diffusing Capacity for Carbon Monoxide Corrected for Alveolar Volume; DLCOcorr = Diffusing Capacity for Carbon Monoxide Corrected for Haemoglobin; DLCOcorr/LV% = Diffusing Capacity for Carbon Monoxide Corrected for Haemoglobin and Lung Volume; FEF<sub>25-75%</sub> = Forced Expiratory Flow over Mid-Half of FVC; FEV<sub>1</sub> = Forced Expiratory Volume in the 1<sup>st</sup> Second of Forced Exhalation; FVC = Forced Vital Capacity; ILD = Interstitial Lung Disease; N/A = Not Applicable; N/R = Not Reported; PFT = Pulmonary Function Test; RV = Residual Volume; SSc = Systemic Sclerosis; TLC = Total Lung Capacity; VC = Vital Capacity

| <b>Record</b>                        | <b>Country</b>        | <b>Study Design (SSc Recruitment Method/Site)</b>                                 | <b>SSc Subjects in Study (% Female)</b> | <b>Age, Years (Range)</b> | <b>PFT Measure(s) Used</b>      | <b>Main PFT Measure</b> | <b>Reason for Using Main PFT</b> |
|--------------------------------------|-----------------------|-----------------------------------------------------------------------------------|-----------------------------------------|---------------------------|---------------------------------|-------------------------|----------------------------------|
| Wu et al. 2013[110] (Abstract)       | United States         | Cohort Study (Genetics versus Environment in Scleroderma Outcome Study (GENISOS)) | 266                                     | N/R                       | FVC%                            | FVC%                    | N/R                              |
| Zhang et al. 2013[111]               | Canada                | Cohort Study (Canadian Scleroderma Research Group (CSRG))                         | 1,043 (86% Female)                      | 55.74 ± 11.88             | FVC%                            | FVC%                    | Previous Use                     |
| Ananyeva et al. 2014[112] (Abstract) | Russia                | Cohort Study (Rheumatology Clinic Lung Study Program)                             | 77 (94% Female)                         | 38                        | DLCO%, FVC%, FVC%/DLCO%         | N/A                     | N/A                              |
| Chakr et al. 2014[113] (Abstract)    | Brazil                | Cohort Study (SSc Clinic)                                                         | 28 (86% Female)                         | 49.7 ± 14.2               | DLCO%, FEV <sub>1</sub> %, FVC% | N/A                     | N/A                              |
| Christmann et al. 2014[114]          | Brazil, United States | Cohort Study                                                                      | 28                                      | N/R                       | FVC%                            | FVC%                    | N/R                              |
| Cottrell et al. 2014[115]            | United States         | Cohort Study (Scleroderma Center)                                                 | 2,205 (83% Female)                      | 46.2 ± 13.6               | FVC%                            | FVC%                    | N/R                              |
| Fratlicelli et al. 2014[116]         | Italy                 | Experimental Study                                                                | 30 (70% Female)                         | 51 (41.75 - 62)           | DLCO Absolute, FVC Absolute     | N/A                     | N/A                              |

Abbreviations: % = Percent Predicted; DLCO = Diffusing Capacity for Carbon Monoxide; DLCO/VA = Diffusing Capacity for Carbon Monoxide Corrected for Alveolar Volume; DLCOcorr = Diffusing Capacity for Carbon Monoxide Corrected for Haemoglobin; DLCOcorr/LV% = Diffusing Capacity for Carbon Monoxide Corrected for Haemoglobin and Lung Volume; FEF<sub>25-75%</sub> = Forced Expiratory Flow over Mid-Half of FVC; FEV<sub>1</sub> = Forced Expiratory Volume in the 1<sup>st</sup> Second of Forced Exhalation; FVC = Forced Vital Capacity; ILD = Interstitial Lung Disease; N/A = Not Applicable; N/R = Not Reported; PFT = Pulmonary Function Test; RV = Residual Volume; SSc = Systemic Sclerosis; TLC = Total Lung Capacity; VC = Vital Capacity

| <b>Record</b>                             | <b>Country</b> | <b>Study Design (SSc Recruitment Method/Site)</b>                                            | <b>SSc Subjects in Study (% Female)</b> | <b>Age, Years (Range)</b> | <b>PFT Measure(s) Used</b> | <b>Main PFT Measure</b> | <b>Reason for Using Main PFT</b> |
|-------------------------------------------|----------------|----------------------------------------------------------------------------------------------|-----------------------------------------|---------------------------|----------------------------|-------------------------|----------------------------------|
| Guillen-Del Castillo et al. 2014[117]     | Spain          | Cohort Study (Hospital Records)                                                              | 63 (86% Female)                         | 43.0 (33.0-54.0)          | DLCO/VA%, FVC%             | FVC%                    | N/A                              |
| Hoffmann-Vold et al. 2014[118] (Abstract) | Norway         | Cohort Study (Norwegian Systemic Connective Tissue Disease and Vasculitis Registry (NOSVAR)) | 305 (79% Female)                        | 48.0                      | DLCO%, FVC%                | N/A                     | N/A                              |
| Kumanovics et al. 2014[119]               | Hungary        | Cohort Study (Tertiary Care Centre)                                                          | 173 (89% Female)                        | 57.6 ± 11.3               | DLCO%, FVC%                | FVC%                    | Most Specific PFT                |
| Kwon et al. 2014[120] (Abstract)          | South Korea    | Cohort Study (Rheumatology Clinic)                                                           | 32 (84% Female)                         | 47.5 ± 9.4                | FVC%                       | FVC%                    | N/R                              |
| Lambrecht et al. 2014[121]                | Belgium        | Case-Control Study (Scleroderma Clinic)                                                      | 119                                     | N/R                       | DLCO%                      | DLCO%                   | N/R                              |
| Le Gouellec et al. 2014[122] (Abstract)   | France         | Cohort Study                                                                                 | 75 (76% Female)                         | N/R                       | DLCO%, FVC%                | N/A                     | N/A                              |
| Narvaez et al. 2014[123] (Abstract)       | Spain          | Cohort Study (Hospital Recruitment)                                                          | 30 (87% Female)                         | 54                        | DLCO%, FVC%, TLC%          | N/A                     | N/A                              |

Abbreviations: % = Percent Predicted; DLCO = Diffusing Capacity for Carbon Monoxide; DLCO/VA = Diffusing Capacity for Carbon Monoxide Corrected for Alveolar Volume; DLCOcorr = Diffusing Capacity for Carbon Monoxide Corrected for Haemoglobin; DLCOcorr/LV% = Diffusing Capacity for Carbon Monoxide Corrected for Haemoglobin and Lung Volume; FEF<sub>25-75%</sub> = Forced Expiratory Flow over Mid-Half of FVC; FEV<sub>1</sub> = Forced Expiratory Volume in the 1<sup>st</sup> Second of Forced Exhalation; FVC = Forced Vital Capacity; ILD = Interstitial Lung Disease; N/A = Not Applicable; N/R = Not Reported; PFT = Pulmonary Function Test; RV = Residual Volume; SSc = Systemic Sclerosis; TLC = Total Lung Capacity; VC = Vital Capacity

| <b>Record</b>                       | <b>Country</b> | <b>Study Design (SSc Recruitment Method/Site)</b> | <b>SSc Subjects in Study (% Female)</b> | <b>Age, Years (Range)</b>                                                                | <b>PFT Measure(s) Used</b> | <b>Main PFT Measure</b> | <b>Reason for Using Main PFT</b> |
|-------------------------------------|----------------|---------------------------------------------------|-----------------------------------------|------------------------------------------------------------------------------------------|----------------------------|-------------------------|----------------------------------|
| Nihtyanova et al. 2014[124]         | United Kingdom | Cohort Study (Tertiary Referral Center)           | 398 (86% Female)                        | 41                                                                                       | DLCO%, FVC%                | N/A                     | N/A                              |
| Parida et al. 2014[125] (Abstract)  | India          | Experimental Study                                | 30                                      | N/R                                                                                      | DLCO%, FVC%, TLC%          | FVC%                    | N/R                              |
| Pham et al. 2014[126] (Abstract)    | United States  | Cohort Study                                      | 20                                      | N/R                                                                                      | DLCO%, FVC%                | N/A                     | N/A                              |
| Poormoghim et al. 2014[127]         | Iran           | Cohort Study (Hospital SSc Database)              | 36 (83% Female)                         | N/R<br>Azathioprine Group: 35.0 (30.1–45.0);<br>Cyclophosphamide Group: 33.0 (29.0–40.5) | DLCOcorr%, FVC%            | N/A                     | N/A                              |
| Rotondo et al. 2014[128] (Abstract) | Italy          | Cohort Study                                      | 70 (90% Female)                         | 59.7 ± 4.5                                                                               | DLCO%, FVC%, RV%, TLC%     | RV%                     | N/R                              |
| Ariani et al. 2015[129] (Abstract)  | Italy          | Cohort Study (Multi-Centre Study)                 | 149                                     | N/R                                                                                      | FVC%                       | FVC%                    | N/R                              |

Abbreviations: % = Percent Predicted; DLCO = Diffusing Capacity for Carbon Monoxide; DLCO/VA = Diffusing Capacity for Carbon Monoxide Corrected for Alveolar Volume; DLCOcorr = Diffusing Capacity for Carbon Monoxide Corrected for Haemoglobin; DLCOcorr/LV% = Diffusing Capacity for Carbon Monoxide Corrected for Haemoglobin and Lung Volume; FEF<sub>25-75%</sub> = Forced Expiratory Flow over Mid-Half of FVC; FEV<sub>1</sub> = Forced Expiratory Volume in the 1<sup>st</sup> Second of Forced Exhalation; FVC = Forced Vital Capacity; ILD = Interstitial Lung Disease; N/A = Not Applicable; N/R = Not Reported; PFT = Pulmonary Function Test; RV = Residual Volume; SSc = Systemic Sclerosis; TLC = Total Lung Capacity; VC = Vital Capacity

| <b>Record</b>                  | <b>Country</b> | <b>Study Design (SSc Recruitment Method/Site)</b>                                            | <b>SSc Subjects in Study (% Female)</b> | <b>Age, Years (Range)</b> | <b>PFT Measure(s) Used</b>            | <b>Main PFT Measure</b> | <b>Reason for Using Main PFT</b> |
|--------------------------------|----------------|----------------------------------------------------------------------------------------------|-----------------------------------------|---------------------------|---------------------------------------|-------------------------|----------------------------------|
| Balbir-Gurman et al. 2015[130] | Israel         | Cohort Study (Tertiary Care Rheumatology Unit)                                               | 26 (77% Female)                         | 50.7 ± 12.7               | DLCO%, FVC%                           | N/A                     | N/A                              |
| Bosello et al. 2015[131]       | Italy          | Experimental Study                                                                           | 20 (85% Female)                         | 41.4 ± 13.1               | DLCO%, FEV <sub>1</sub> %, FVC%, TLC% | N/A                     | N/A                              |
| De Luca et al. 2015[132]       | Italy          | Case-Control Study (Rheumatology Inpatient Clinic)                                           | 120                                     | N/R                       | DLCO%, FEV <sub>1</sub> % FVC%        | N/A                     | N/A                              |
| Hoffmann-Vold et al. 2015[133] | Norway         | Cohort Study (Norwegian Systemic Connective Tissue Disease and Vasculitis Registry (NOSVAR)) | 305 (79% Female)                        | 48 ± 15.0                 | DLCO%, FVC%                           | FVC%                    | Previous Use                     |
| Iudici et al. 2015[134]        | Italy          | Cohort Study (Rheumatology Unit)                                                             | 45 (91% Female)                         | 49.86 ± 13.33             | DLCOcorr%, FVC%                       | N/A                     | N/A                              |

Abbreviations: % = Percent Predicted; DLCO = Diffusing Capacity for Carbon Monoxide; DLCO/VA = Diffusing Capacity for Carbon Monoxide Corrected for Alveolar Volume; DLCOcorr = Diffusing Capacity for Carbon Monoxide Corrected for Haemoglobin; DLCOcorr/LV% = Diffusing Capacity for Carbon Monoxide Corrected for Haemoglobin and Lung Volume; FEF<sub>25-75%</sub> = Forced Expiratory Flow over Mid-Half of FVC; FEV<sub>1</sub> = Forced Expiratory Volume in the 1<sup>st</sup> Second of Forced Exhalation; FVC = Forced Vital Capacity; ILD = Interstitial Lung Disease; N/A = Not Applicable; N/R = Not Reported; PFT = Pulmonary Function Test; RV = Residual Volume; SSc = Systemic Sclerosis; TLC = Total Lung Capacity; VC = Vital Capacity

| <b>Record</b>                      | <b>Country</b>                               | <b>Study Design (SSc Recruitment Method/Site)</b>                             | <b>SSc Subjects in Study (% Female)</b> | <b>Age, Years (Range)</b> | <b>PFT Measure(s) Used</b> | <b>Main PFT Measure</b> | <b>Reason for Using Main PFT</b> |
|------------------------------------|----------------------------------------------|-------------------------------------------------------------------------------|-----------------------------------------|---------------------------|----------------------------|-------------------------|----------------------------------|
| Jordan et al. 2015[135]            | Switzerland                                  | Case-Control Study (European Scleroderma Trial and Research (EUSTAR) Centres) | 63 (71% Female)                         | 50.9 ± 1.6                | DLCO%, FVC%                | FVC%                    | Previous Use                     |
| Khanna et al. 2015[136] (Abstract) | United States                                | Experimental Study (LOTUSS Study)                                             | 63 (83% Female)                         | 50.6 ± 12.3               | DLCO%, FVC%                | N/A                     | N/A                              |
| Khanna et al. 2015[137]            | United States                                | Cohort Study (Scleroderma Lung Study I (SLS I))                               | 93 (73% Female)                         | 47.19 ± 11.72             | DLCO%, FVC%                | N/A                     | N/A                              |
| Koneva et al. 2015[138] (Abstract) | Russia                                       | Cohort Study                                                                  | 54 (81% Female)                         | 48.5 ± 12.9               | DLCO%, FVC%                | N/A                     | N/A                              |
| Lepri et al. 2015[139] (Abstract)  | Australia, France, Italy, Spain, Switzerland | Cohort Study (Multi-Centre Study)                                             | 23                                      | N/R                       | DLCO%, FVC%                | FVC%                    | N/R                              |
| Man et al. 2015[140]               | United States                                | Cohort Study (SSc Referral Centre)                                            | 254 (80% Female)                        | 49 ± 13                   | FVC%                       | FVC%                    | Validation                       |

Abbreviations: % = Percent Predicted; DLCO = Diffusing Capacity for Carbon Monoxide; DLCO/VA = Diffusing Capacity for Carbon Monoxide Corrected for Alveolar Volume; DLCOcorr = Diffusing Capacity for Carbon Monoxide Corrected for Haemoglobin; DLCOcorr/LV% = Diffusing Capacity for Carbon Monoxide Corrected for Haemoglobin and Lung Volume; FEF<sub>25-75%</sub> = Forced Expiratory Flow over Mid-Half of FVC; FEV<sub>1</sub> = Forced Expiratory Volume in the 1<sup>st</sup> Second of Forced Exhalation; FVC = Forced Vital Capacity; ILD = Interstitial Lung Disease; N/A = Not Applicable; N/R = Not Reported; PFT = Pulmonary Function Test; RV = Residual Volume; SSc = Systemic Sclerosis; TLC = Total Lung Capacity; VC = Vital Capacity



| <b>Record</b>                                       | <b>Country</b>                      | <b>Study Design<br/>(SSc<br/>Recruitment<br/>Method/Site)</b>                                                      | <b>SSc Subjects<br/>in Study<br/>(% Female)</b> | <b>Age, Years<br/>(Range)</b> | <b>PFT Measure(s)<br/>Used</b>  | <b>Main PFT<br/>Measure</b> | <b>Reason for<br/>Using<br/>Main PFT</b> |
|-----------------------------------------------------|-------------------------------------|--------------------------------------------------------------------------------------------------------------------|-------------------------------------------------|-------------------------------|---------------------------------|-----------------------------|------------------------------------------|
| Mani et al.<br>2015[141]<br>(Abstract)              | India                               | Experimental<br>Study<br>(Tertiary Care<br>Hospital)                                                               | 62                                              | N/R                           | FVC%                            | FVC%                        | N/R                                      |
| Mateos-<br>Toledo et al.<br>2015[142]<br>(Abstract) | Mexico                              | Cohort Study                                                                                                       | 46                                              | N/R                           | DLCO%,<br>FVC Absolute,<br>FVC% | N/A                         | N/A                                      |
| Narvaez et al.<br>2015[143]<br>(Abstract)           | Spain                               | Cohort Study                                                                                                       | 31                                              | 59                            | DLCO%,<br>FVC%,<br>TLC%         | N/A                         | N/A                                      |
| Ninaber et al.<br>2015[144]                         | The<br>Netherlands                  | Cohort Study<br>(Referrals to<br>Tertiary<br>Outpatient<br>Targeted<br>Multidisciplinary<br>Healthcare<br>Program) | 41<br>(76%<br>Female)                           | 50.9                          | DLCO%,<br>FVC%                  | DLCO%                       | N/R                                      |
| Radic et al.<br>2015[145]<br>(Abstract)             | Croatia,<br>Germany,<br>Switzerland | Cohort Study<br>(European<br>Scleroderma Trial<br>and Research<br>(EUSTAR)<br>Database)                            | 124                                             | N/R                           | DLCO%,<br>FVC%                  | N/A                         | N/A                                      |

Abbreviations: % = Percent Predicted; DLCO = Diffusing Capacity for Carbon Monoxide; DLCO/VA = Diffusing Capacity for Carbon Monoxide Corrected for Alveolar Volume; DLCOcorr = Diffusing Capacity for Carbon Monoxide Corrected for Haemoglobin; DLCOcorr/LV% = Diffusing Capacity for Carbon Monoxide Corrected for Haemoglobin and Lung Volume; FEF<sub>25-75%</sub> = Forced Expiratory Flow over Mid-Half of FVC; FEV<sub>1</sub> = Forced Expiratory Volume in the 1<sup>st</sup> Second of Forced Exhalation; FVC = Forced Vital Capacity; ILD = Interstitial Lung Disease; N/A = Not Applicable; N/R = Not Reported; PFT = Pulmonary Function Test; RV = Residual Volume; SSc = Systemic Sclerosis; TLC = Total Lung Capacity; VC = Vital Capacity

| <b>Record</b>                        | <b>Country</b> | <b>Study Design (SSc Recruitment Method/Site)</b>                                               | <b>SSc Subjects in Study (% Female)</b> | <b>Age, Years (Range)</b> | <b>PFT Measure(s) Used</b> | <b>Main PFT Measure</b> | <b>Reason for Using Main PFT</b> |
|--------------------------------------|----------------|-------------------------------------------------------------------------------------------------|-----------------------------------------|---------------------------|----------------------------|-------------------------|----------------------------------|
| Sakamoto et al. 2015[146]            | Japan          | Case-Control Study (Hospital Records)                                                           | 33 (70% Female)                         | 63 (54-70)                | VC Absolute                | VC Absolute             | Previous Use                     |
| Saketkoo et al. 2015[147] (Abstract) | United States  | Cohort Study (Pulmonary Hypertension Recognition and Outcomes in Scleroderma (PHAROS) Registry) | 256                                     | N/R                       | FVC%                       | FVC%                    | N/R                              |
| Schulam et al. 2015[148] (Abstract)  | United States  | Cohort Study                                                                                    | 672                                     | N/R                       | FVC%                       | FVC%                    | N/R                              |
| Shirai et al. 2015[149] (Abstract)   | Japan          | Cohort Study (SSc Database)                                                                     | 58                                      | N/R                       | FVC%                       | FVC%                    | N/R                              |
| Suliman et al. 2015[150]             | Switzerland    | Cohort Study (Division of Rheumatology)                                                         | 102 (77% Female)                        | 58.5 (28-90)              | FVC%                       | FVC%                    | Previous Use                     |
| Tanaseanu et al. 2015[151]           | Romania        | Cohort Study                                                                                    | 40 (95% Female)                         | 34 ± 12                   | DLCO%, FEV <sub>1</sub> %  | N/A                     | N/A                              |

Abbreviations: % = Percent Predicted; DLCO = Diffusing Capacity for Carbon Monoxide; DLCO/VA = Diffusing Capacity for Carbon Monoxide Corrected for Alveolar Volume; DLCCorr = Diffusing Capacity for Carbon Monoxide Corrected for Haemoglobin; DLCCorr/LV% = Diffusing Capacity for Carbon Monoxide Corrected for Haemoglobin and Lung Volume; FEF<sub>25-75%</sub> = Forced Expiratory Flow over Mid-Half of FVC; FEV<sub>1</sub> = Forced Expiratory Volume in the 1<sup>st</sup> Second of Forced Exhalation; FVC = Forced Vital Capacity; ILD = Interstitial Lung Disease; N/A = Not Applicable; N/R = Not Reported; PFT = Pulmonary Function Test; RV = Residual Volume; SSc = Systemic Sclerosis; TLC = Total Lung Capacity; VC = Vital Capacity

| <b>Record</b>                       | <b>Country</b> | <b>Study Design (SSc Recruitment Method/Site)</b>                             | <b>SSc Subjects in Study (% Female)</b> | <b>Age, Years (Range)</b> | <b>PFT Measure(s) Used</b> | <b>Main PFT Measure</b> | <b>Reason for Using Main PFT</b> |
|-------------------------------------|----------------|-------------------------------------------------------------------------------|-----------------------------------------|---------------------------|----------------------------|-------------------------|----------------------------------|
| Tashkin et al. 2015[152] (Abstract) | United States  | Experimental Study (Scleroderma Lung Study II (SLS II))                       | 142                                     | N/R                       | DLCO%, FVC%                | FVC%                    | N/R                              |
| Volkman et al. 2015[153]            | United States  | Cohort Study (Scleroderma Lung Study I (SLS I))                               | 82 (73% Female)                         | 47.2                      | FVC%, TLC%                 | N/A                     | N/A                              |
| Volkman et al. 2015[154] (Abstract) | United States  | Cohort Study (Scleroderma Lung Study II (SLS II))                             | 136                                     | N/R                       | DLCO%                      | DLCO%                   | Previous Use                     |
| Wallace et al. 2015[155]            | United States  | Cohort Study (Combined Response Index in Systemic Sclerosis (CRISS) Database) | 177 (75% Female)                        | 50.5 ± 11.7               | DLCO%, FVC%, TLC%          | N/A                     | N/A                              |
| Fava et al. 2016[156]               | United States  | Cohort Study (Scleroderma Center)                                             | 27 (78% Female)                         | 51.3 ± 9.6                | FVC%                       | FVC%                    | N/R                              |

Abbreviations: % = Percent Predicted; DLCO = Diffusing Capacity for Carbon Monoxide; DLCO/VA = Diffusing Capacity for Carbon Monoxide Corrected for Alveolar Volume; DLCOcorr = Diffusing Capacity for Carbon Monoxide Corrected for Haemoglobin; DLCOcorr/LV% = Diffusing Capacity for Carbon Monoxide Corrected for Haemoglobin and Lung Volume; FEF<sub>25-75%</sub> = Forced Expiratory Flow over Mid-Half of FVC; FEV<sub>1</sub> = Forced Expiratory Volume in the 1<sup>st</sup> Second of Forced Exhalation; FVC = Forced Vital Capacity; ILD = Interstitial Lung Disease; N/A = Not Applicable; N/R = Not Reported; PFT = Pulmonary Function Test; RV = Residual Volume; SSc = Systemic Sclerosis; TLC = Total Lung Capacity; VC = Vital Capacity

| <b>Record</b>                  | <b>Country</b> | <b>Study Design (SSc Recruitment Method/Site)</b>                                                  | <b>SSc Subjects in Study (% Female)</b> | <b>Age, Years (Range)</b> | <b>PFT Measure(s) Used</b>                                                                                                   | <b>Main PFT Measure</b> | <b>Reason for Using Main PFT</b> |
|--------------------------------|----------------|----------------------------------------------------------------------------------------------------|-----------------------------------------|---------------------------|------------------------------------------------------------------------------------------------------------------------------|-------------------------|----------------------------------|
| Hoffmann-Vold et al. 2016[157] | Norway         | Case-Control Study (Norwegian Systemic Connective Tissue Disease and Vasculitis Registry (NOSVAR)) | 298 (82% Female)                        | 48 ± 15.4                 | DLCO%, FVC%                                                                                                                  | FVC%                    | N/R                              |
| Kloth et al. 2016[158]         | Germany        | Cohort Study (Radiology Department Database)                                                       | 26 (54% Female)                         | 37.45 ± 9.83 (11-51)      | DLCO Absolute, DLCO%, FEV <sub>1</sub> Absolute, FEV <sub>1</sub> %, FVC Absolute, FVC%, TLC Absolute, TLC% VC Absolute, VC% | N/A                     | N/A                              |
| Owen et al. 2016[159]          | Australia      | Cohort Study (Australia Scleroderma Cohort Study (ASCS))                                           | 47 (79% Female)                         | 54.6                      | DLCO Absolute, FVC Absolute                                                                                                  | FVC Absolute            | Previous Use                     |
| Shenoy et al. 2016[160]        | India          | Cohort Study (Rheumatology Outpatient Department)                                                  | 57 (86% Female)                         | 45.55                     | FVC%                                                                                                                         | FVC%                    | Most Specific PFT                |

Abbreviations: % = Percent Predicted; DLCO = Diffusing Capacity for Carbon Monoxide; DLCO/VA = Diffusing Capacity for Carbon Monoxide Corrected for Alveolar Volume; DLCOcorr = Diffusing Capacity for Carbon Monoxide Corrected for Haemoglobin; DLCOcorr/LV% = Diffusing Capacity for Carbon Monoxide Corrected for Haemoglobin and Lung Volume; FEF<sub>25-75%</sub> = Forced Expiratory Flow over Mid-Half of FVC; FEV<sub>1</sub> = Forced Expiratory Volume in the 1<sup>st</sup> Second of Forced Exhalation; FVC = Forced Vital Capacity; ILD = Interstitial Lung Disease; N/A = Not Applicable; N/R = Not Reported; PFT = Pulmonary Function Test; RV = Residual Volume; SSc = Systemic Sclerosis; TLC = Total Lung Capacity; VC = Vital Capacity

| <b>Record</b>                                                 | <b>Country</b>                                                                                                                                                        | <b>Study Design<br/>(SSc<br/>Recruitment<br/>Method/Site)</b> | <b>SSc Subjects<br/>in Study<br/>(% Female)</b> | <b>Age, Years<br/>(Range)</b> | <b>PFT Measure(s)<br/>Used</b> | <b>Main PFT<br/>Measure</b> | <b>Reason for<br/>Using<br/>Main PFT</b> |
|---------------------------------------------------------------|-----------------------------------------------------------------------------------------------------------------------------------------------------------------------|---------------------------------------------------------------|-------------------------------------------------|-------------------------------|--------------------------------|-----------------------------|------------------------------------------|
| ClinicalTrials.gov ID:<br>NCT00319033[161]<br>(Registration)  | Canada,<br>France,<br>Germany,<br>Israel,<br>Italy,<br>Republic of<br>Korea,<br>The<br>Netherlands,<br>Sweden,<br>Switzerland,<br>United<br>Kingdom,<br>United States | Experimental<br>Study<br>(BUILD 2 OL)                         | 132                                             | N/A                           | DLCO,<br>FVC                   | N/A                         | N/A                                      |
| EudraCT #:<br>2008-<br>000224-<br>27[162]<br>(Registration)   | United<br>Kingdom                                                                                                                                                     | Cohort Study                                                  | 20<br>(Anticipated)                             | N/A                           | DLCO%,<br>FVC%                 | N/A                         | N/A                                      |
| ClinicalTrials.gov ID:<br>NCT01570764 [163]<br>(Registration) | France                                                                                                                                                                | Experimental<br>Study<br>(SCLEROCYC)                          | 50<br>(Anticipated)                             | N/A                           | DLCO%,<br>FVC%                 | FVC%                        | N/R                                      |

Abbreviations: % = Percent Predicted; DLCO = Diffusing Capacity for Carbon Monoxide; DLCO/VA = Diffusing Capacity for Carbon Monoxide Corrected for Alveolar Volume; DLCOcorr = Diffusing Capacity for Carbon Monoxide Corrected for Haemoglobin; DLCOcorr/LV% = Diffusing Capacity for Carbon Monoxide Corrected for Haemoglobin and Lung Volume; FEF<sub>25-75%</sub> = Forced Expiratory Flow over Mid-Half of FVC; FEV<sub>1</sub> = Forced Expiratory Volume in the 1<sup>st</sup> Second of Forced Exhalation; FVC = Forced Vital Capacity; ILD = Interstitial Lung Disease; N/A = Not Applicable; N/R = Not Reported; PFT = Pulmonary Function Test; RV = Residual Volume; SSc = Systemic Sclerosis; TLC = Total Lung Capacity; VC = Vital Capacity

| <b>Record</b>                                           | <b>Country</b>                                                                                       | <b>Study Design<br/>(SSc<br/>Recruitment<br/>Method/Site)</b> | <b>SSc Subjects<br/>in Study<br/>(% Female)</b> | <b>Age, Years<br/>(Range)</b> | <b>PFT Measure(s)<br/>Used</b> | <b>Main PFT<br/>Measure</b> | <b>Reason for<br/>Using<br/>Main PFT</b> |
|---------------------------------------------------------|------------------------------------------------------------------------------------------------------|---------------------------------------------------------------|-------------------------------------------------|-------------------------------|--------------------------------|-----------------------------|------------------------------------------|
| ClinicalTrials.gov ID: NCT01559129[164] (Registration)  | Australia, France, Germany, Italy, Poland, Russia, Spain, Switzerland, United Kingdom, United States | Experimental Study                                            | 23                                              | N/A                           | FVC Absolute                   | FVC Absolute                | N/R                                      |
| ClinicalTrials.gov ID: NCT01858259 [165] (Registration) | France, Germany, Hungary, Italy, Switzerland, United Kingdom                                         | Cohort Study (DeSSciphher)                                    | 1,372                                           | N/A                           | DLCO%, FVC%                    | FVC%                        | N/R                                      |

Abbreviations: % = Percent Predicted; DLCO = Diffusing Capacity for Carbon Monoxide; DLCO/VA = Diffusing Capacity for Carbon Monoxide Corrected for Alveolar Volume; DLCOcorr = Diffusing Capacity for Carbon Monoxide Corrected for Haemoglobin; DLCOcorr/LV% = Diffusing Capacity for Carbon Monoxide Corrected for Haemoglobin and Lung Volume; FEF<sub>25-75%</sub> = Forced Expiratory Flow over Mid-Half of FVC; FEV<sub>1</sub> = Forced Expiratory Volume in the 1<sup>st</sup> Second of Forced Exhalation; FVC = Forced Vital Capacity; ILD = Interstitial Lung Disease; N/A = Not Applicable; N/R = Not Reported; PFT = Pulmonary Function Test; RV = Residual Volume; SSc = Systemic Sclerosis; TLC = Total Lung Capacity; VC = Vital Capacity

| <b>Record</b>                                          | <b>Country</b>                                                                                                                                                                                  | <b>Study Design<br/>(SSc<br/>Recruitment<br/>Method/Site)</b> | <b>SSc Subjects<br/>in Study<br/>(% Female)</b> | <b>Age, Years<br/>(Range)</b> | <b>PFT Measure(s)<br/>Used</b> | <b>Main PFT<br/>Measure</b> | <b>Reason for<br/>Using<br/>Main PFT</b> |
|--------------------------------------------------------|-------------------------------------------------------------------------------------------------------------------------------------------------------------------------------------------------|---------------------------------------------------------------|-------------------------------------------------|-------------------------------|--------------------------------|-----------------------------|------------------------------------------|
| ClinicalTrials.gov ID: NCT02597933[166] (Registration) | Australia, Belgium, Canada, China, Denmark, France, Germany, Greece, India, Ireland, Israel, Italy, Japan, The Netherlands, Poland, Portugal, Spain, Switzerland, United Kingdom, United States | Experimental Study                                            | 520 (Anticipated)                               | N/A                           | DLCO%, FVC Absolute, FVC%      | FVC Absolute                | Previous Use                             |
| ClinicalTrials.gov ID: NCT02588625[167] (Registration) | Canada, Poland, United Kingdom, United States                                                                                                                                                   | Experimental Study                                            | N/R                                             | N/A                           | FVC%                           | FVC%                        | N/R                                      |

Abbreviations: % = Percent Predicted; DLCO = Diffusing Capacity for Carbon Monoxide; DLCO/VA = Diffusing Capacity for Carbon Monoxide Corrected for Alveolar Volume; DLCOcorr = Diffusing Capacity for Carbon Monoxide Corrected for Haemoglobin; DLCOcorr/LV% = Diffusing Capacity for Carbon Monoxide Corrected for Haemoglobin and Lung Volume; FEF<sub>25-75%</sub> = Forced Expiratory Flow over Mid-Half of FVC; FEV<sub>1</sub> = Forced Expiratory Volume in the 1<sup>st</sup> Second of Forced Exhalation; FVC = Forced Vital Capacity; ILD = Interstitial Lung Disease; N/A = Not Applicable; N/R = Not Reported; PFT = Pulmonary Function Test; RV = Residual Volume; SSc = Systemic Sclerosis; TLC = Total Lung Capacity; VC = Vital Capacity

| <b>Record</b>                                                | <b>Country</b>                                                                                                    | <b>Study Design<br/>(SSc<br/>Recruitment<br/>Method/Site)</b> | <b>SSc Subjects<br/>in Study<br/>(% Female)</b> | <b>Age, Years<br/>(Range)</b> | <b>PFT Measure(s)<br/>Used</b>                       | <b>Main PFT<br/>Measure</b> | <b>Reason for<br/>Using<br/>Main PFT</b> |
|--------------------------------------------------------------|-------------------------------------------------------------------------------------------------------------------|---------------------------------------------------------------|-------------------------------------------------|-------------------------------|------------------------------------------------------|-----------------------------|------------------------------------------|
| ClinicalTrials.gov ID:<br>NCT02370693[168]<br>(Registration) | United States                                                                                                     | Experimental Study                                            | 30<br>(Anticipated)                             | N/A                           | FVC                                                  | FVC                         | N/R                                      |
| ClinicalTrials.gov ID:<br>NCT02745145[169]<br>(Registration) | Argentina,<br>Australia,<br>Canada,<br>Israel,<br>Italy,<br>Poland,<br>Spain,<br>United Kingdom,<br>United States | Experimental Study                                            | 175<br>(Anticipated)                            | N/A                           | DLCO%,<br>DLCO/VA,<br>FVC Absolute,<br>FVC%,<br>TLC% | FVC<br>Absolute             | N/R                                      |

Abbreviations: % = Percent Predicted; DLCO = Diffusing Capacity for Carbon Monoxide; DLCO/VA = Diffusing Capacity for Carbon Monoxide Corrected for Alveolar Volume; DLCOcorr = Diffusing Capacity for Carbon Monoxide Corrected for Haemoglobin; DLCOcorr/LV% = Diffusing Capacity for Carbon Monoxide Corrected for Haemoglobin and Lung Volume; FEF<sub>25-75%</sub> = Forced Expiratory Flow over Mid-Half of FVC; FEV<sub>1</sub> = Forced Expiratory Volume in the 1<sup>st</sup> Second of Forced Exhalation; FVC = Forced Vital Capacity; ILD = Interstitial Lung Disease; N/A = Not Applicable; N/R = Not Reported; PFT = Pulmonary Function Test; RV = Residual Volume; SSc = Systemic Sclerosis; TLC = Total Lung Capacity; VC = Vital Capacity



#### **e-APPENDIX 4: Cumulative Use and Percent Cumulative Use of Absolute and Percent Predicted Values**

Percent predicted PFT values were cumulatively more commonly used than absolute measures as outcomes for SSc-ILD progression throughout the study period. However, their use was similar to that of absolute PFT values until the mid- 1990's, at which point the cumulative use of percent predicted values skyrocketed (e-Figure 1a). By the end of the study period, PFTs were expressed as percent predicted values in 155 (93.9%) of the 169 outcome studies, while they were reported as absolute values in 27 (16.4%) of studies. This is further depicted in e-Figure 1b which illustrates the percent cumulative use of absolute and percent predicted PFT values. Indeed, while the cumulative percent use of percent predicted PFT values increased steadily as of the mid-1990's, the cumulative percent use of absolute PFT values plummeted in a consistent manner.

A probable explanation for the increasing popularity of percent predicted values throughout the study period is the proposal of new PFT standardization and interpretative guidelines. In fact, in a 1987 report, the American Thoracic Society (ATS) focused mainly on absolute values, while also discussing the new development of standardizing PFTs using reference values.[170]

Following a 1991 ATS statement on the selection and interpretation of PFT reference values,[171] the ATS's subsequent guideline on the standardization of PFTs in 1995 placed emphasis solely on percent predicted values.[172] It is perhaps this report that can explain the decrease in percent cumulative use of absolute values in favour of percent predicted values in the mid-1990s.

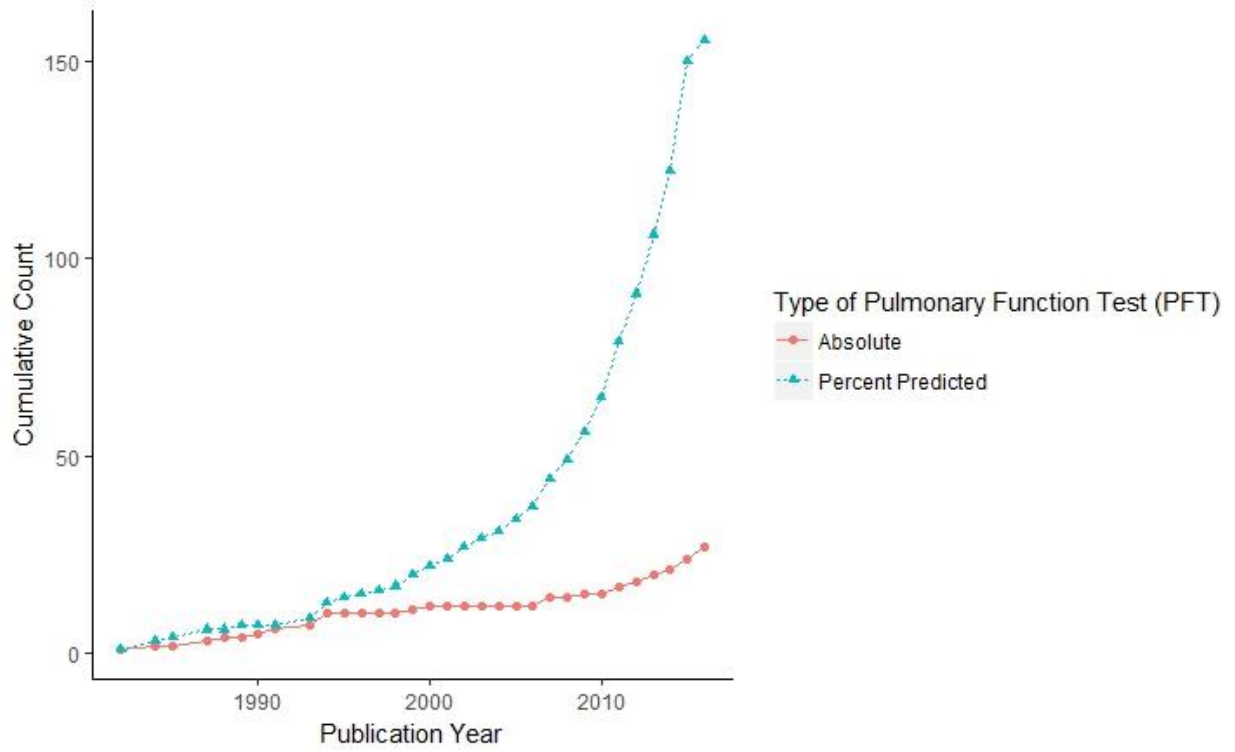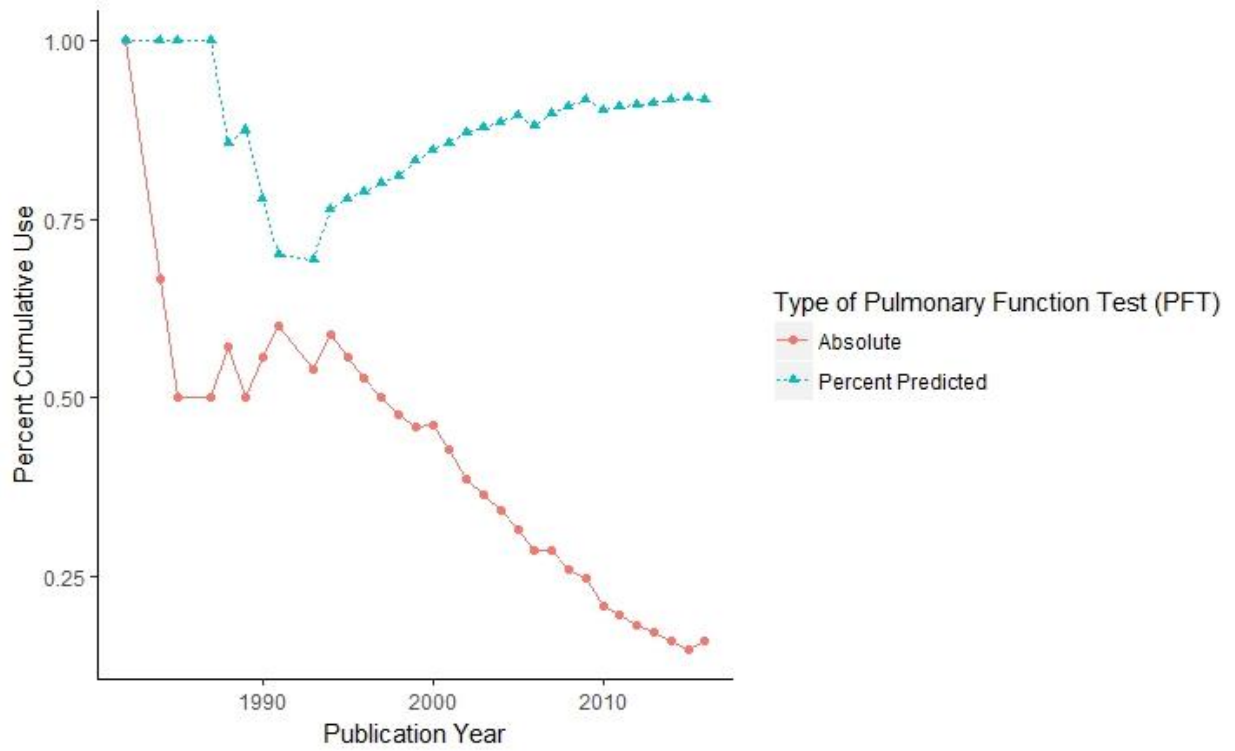

**e-Figure 1: a) Cumulative Use and b) Percent Cumulative Use of Absolute and Percent Predicted Pulmonary Function Test (PFT) Measures as Longitudinal Outcomes for Systemic Sclerosis-Associated Interstitial Lung Disease (SSc-ILD) Progression.**

For each year, percent cumulative use was calculated by dividing the cumulative use of both absolute and percent predicted PFT measures by the cumulative number of published articles.

**e-APPENDIX 5: Characteristics of the Validation Studies (N = 50)**

| <b>Record</b>                | <b>Country</b>    | <b>Study Design<br/>(SSc<br/>Recruitment<br/>Method/Site)</b>   | <b>SSc<br/>Subjects in<br/>Study<br/>(%<br/>Female)</b> | <b>Age,<br/>Years<br/>(Range)</b> | <b>Gold Standard<br/>(Scoring Method)</b>                                                                                                    | <b>Type of<br/>Validation</b> | <b>PFT Measures<br/>Considered</b>                          |
|------------------------------|-------------------|-----------------------------------------------------------------|---------------------------------------------------------|-----------------------------------|----------------------------------------------------------------------------------------------------------------------------------------------|-------------------------------|-------------------------------------------------------------|
| Harrison et al.<br>1991[173] | United<br>Kingdom | Case-Control<br>Study<br>(Hospital<br>Records)                  | 34<br>(76%<br>Female)                                   | 45<br>(22-67)                     | Lung Biopsy<br>(Four-Point<br>Scoring System for<br>Interstitial Fibrosis,<br>Four-Point Scoring<br>System for Loss of<br>Lung Architecture) | Cross-<br>Sectional           | DLCO%                                                       |
| Wells et al.<br>1997[174]    | United<br>Kingdom | Cross-Sectional<br>Study<br>(Interstitial Lung<br>Disease Unit) | 64<br>(80%<br>Female)                                   | 48.8 ±<br>11.6                    | HRCT<br>(Nearest 5% -<br>Overall Lung<br>Involvement)                                                                                        | Cross-<br>Sectional           | DLCO%,<br>DLCO/VA%,<br>FEV <sub>1</sub> %,<br>FVC%,<br>TLC% |
| Wells et al.<br>1997[175]    | United<br>Kingdom | Cross-Sectional<br>Study<br>(Interstitial Lung<br>Disease Unit) | 57<br>(82%<br>Female)                                   | 48 ± 12                           | HRCT<br>(Nearest 5% -<br>Overall Lung<br>Involvement)                                                                                        | Cross-<br>Sectional           | DLCO%                                                       |
| Diot et al.<br>1998[176]     | France            | Cross-Sectional<br>Study<br>(Hospital<br>Referrals)             | 52<br>(98%<br>Female)                                   | 53.71 ±<br>14.12<br>(23-79)       | HRCT<br>(Warrick Total<br>Score (0-30))                                                                                                      | Cross-<br>Sectional           | DLCO%,<br>TLC%                                              |

Abbreviations: % = Percent Predicted; DLCO = Diffusing Capacity for Carbon Monoxide; DLCO/VA = Diffusing Capacity for Carbon Monoxide Corrected for Alveolar Volume; DLCOcorr = Diffusing Capacity for Carbon Monoxide Corrected for Haemoglobin; DLCOcorr/VA = Diffusing Capacity for Carbon Monoxide Corrected for Alveolar Volume and Haemoglobin; FEV<sub>1</sub> = Forced Expiratory Volume in the 1<sup>st</sup> Second of Forced Exhalation; FRC = Functional Residual Capacity; FVC = Forced Vital Capacity; HRCT = High-Resolution Computed Tomography; ILD = Interstitial Lung Disease; N/R = Not Reported; PFT = Pulmonary Function Test; RV = Residual Volume; TLC = Total Lung Capacity; VC = Vital Capacity

| <b>Record</b>                         | <b>Country</b> | <b>Study Design<br/>(SSc<br/>Recruitment<br/>Method/Site)</b>                     | <b>SSc<br/>Subjects in<br/>Study<br/>(%<br/>Female)</b> | <b>Age,<br/>Years<br/>(Range)</b> | <b>Gold Standard<br/>(Scoring Method)</b>                                                                                                                                          | <b>Type of<br/>Validation</b> | <b>PFT Measures<br/>Considered</b>                                              |
|---------------------------------------|----------------|-----------------------------------------------------------------------------------|---------------------------------------------------------|-----------------------------------|------------------------------------------------------------------------------------------------------------------------------------------------------------------------------------|-------------------------------|---------------------------------------------------------------------------------|
| Kim et al.<br>2001[177]               | South<br>Korea | Cohort Study<br>(Tertiary Hospital<br>Clinical Records)                           | 40<br>(85%<br>Female)                                   | 54<br>(27-76)                     | HRCT<br>(Nearest 5% -<br>Ground-Glass<br>Opacity,<br>Nearest 5% -<br>Honeycombing,<br>Nearest 5% -<br>Irregular Linear<br>Opacity,<br>Nearest 5% -<br>Overall Lung<br>Involvement) | Longitudinal                  | DLCO%,<br>FEV <sub>1</sub> Absolute,<br>FEV <sub>1</sub> /FVC%,<br>FVC Absolute |
| Shahin et al.<br>2001[178]            | Egypt          | Case-Control<br>Study<br>(Department of<br>Rheumatology<br>and<br>Rehabilitation) | 22<br>(95%<br>Female)                                   | 37.6 ±<br>14.3                    | HRCT<br>(Total Score (0-At<br>Least 21))                                                                                                                                           | Cross-<br>Sectional           | DLCO%                                                                           |
| Han et al.<br>2003[179]<br>(Abstract) | South<br>Korea | Cross-Sectional<br>Study                                                          | 43                                                      | 46.8 ±<br>11.9                    | HRCT<br>(Absence/Presence<br>of Pulmonary<br>Fibrosis)                                                                                                                             | Cross-<br>Sectional           | DLCO%                                                                           |

Abbreviations: % = Percent Predicted; DLCO = Diffusing Capacity for Carbon Monoxide; DLCO/VA = Diffusing Capacity for Carbon Monoxide Corrected for Alveolar Volume; DLCOcorr = Diffusing Capacity for Carbon Monoxide Corrected for Haemoglobin; DLCOcorr/VA = Diffusing Capacity for Carbon Monoxide Corrected for Alveolar Volume and Haemoglobin; FEV<sub>1</sub> = Forced Expiratory Volume in the 1<sup>st</sup> Second of Forced Exhalation; FRC = Functional Residual Capacity; FVC = Forced Vital Capacity; HRCT = High-Resolution Computed Tomography; ILD = Interstitial Lung Disease; N/R = Not Reported; PFT = Pulmonary Function Test; RV = Residual Volume; TLC = Total Lung Capacity; VC = Vital Capacity

| <b>Record</b>                | <b>Country</b> | <b>Study Design<br/>(SSc<br/>Recruitment<br/>Method/Site)</b>             | <b>SSc<br/>Subjects in<br/>Study<br/>(%<br/>Female)</b> | <b>Age,<br/>Years<br/>(Range)</b> | <b>Gold Standard<br/>(Scoring Method)</b>                                                    | <b>Type of<br/>Validation</b> | <b>PFT Measures<br/>Considered</b>             |
|------------------------------|----------------|---------------------------------------------------------------------------|---------------------------------------------------------|-----------------------------------|----------------------------------------------------------------------------------------------|-------------------------------|------------------------------------------------|
| Ooi et al.<br>2003[180]      | China          | Cross-Sectional<br>Study<br>(Division of<br>Rheumatology)                 | 45<br>(89%<br>Female)                                   | 48.5 ±<br>13.4                    | HRCT<br>(Fibrosis Index (0-<br>48),<br>Inflammatory<br>Index (0-48),<br>Total Score (0-96))  | Cross-<br>Sectional           | DLCO%,<br>FEV <sub>1</sub> %,<br>FVC%,<br>TLC% |
| De Santis et<br>al. 2005[36] | Italy          | Cohort Study<br>(Outpatient Clinic<br>of the Division of<br>Rheumatology) | 100<br>(92%<br>Female)                                  | 55.4 ±<br>11.9                    | HRCT<br>(Kazerooni<br>Alveolar Score (0-<br>5),<br>Kazerooni<br>Interstitial Score<br>(0-5)) | Cross-<br>Sectional           | DLCO%,<br>FVC%                                 |

Abbreviations: % = Percent Predicted; DLCO = Diffusing Capacity for Carbon Monoxide; DLCO/VA = Diffusing Capacity for Carbon Monoxide Corrected for Alveolar Volume; DLCOcorr = Diffusing Capacity for Carbon Monoxide Corrected for Haemoglobin; DLCOcorr/VA = Diffusing Capacity for Carbon Monoxide Corrected for Alveolar Volume and Haemoglobin; FEV<sub>1</sub> = Forced Expiratory Volume in the 1<sup>st</sup> Second of Forced Exhalation; FRC = Functional Residual Capacity; FVC = Forced Vital Capacity; HRCT = High-Resolution Computed Tomography; ILD = Interstitial Lung Disease; N/R = Not Reported; PFT = Pulmonary Function Test; RV = Residual Volume; TLC = Total Lung Capacity; VC = Vital Capacity

| <b>Record</b>               | <b>Country</b> | <b>Study Design<br/>(SSc<br/>Recruitment<br/>Method/Site)</b> | <b>SSc<br/>Subjects in<br/>Study<br/>(%<br/>Female)</b> | <b>Age,<br/>Years<br/>(Range)</b> | <b>Gold Standard<br/>(Scoring Method)</b>                                                                                                                                                                                                                                                                                    | <b>Type of<br/>Validation</b> | <b>PFT Measures<br/>Considered</b> |
|-----------------------------|----------------|---------------------------------------------------------------|---------------------------------------------------------|-----------------------------------|------------------------------------------------------------------------------------------------------------------------------------------------------------------------------------------------------------------------------------------------------------------------------------------------------------------------------|-------------------------------|------------------------------------|
| Orlandi et al.<br>2006[181] | Italy          | Cross-Sectional<br>Study<br>(SSc Outpatients)                 | 39<br>(87%<br>Female)                                   | 58 ± 13<br>(18-80)                | HRCT<br>(Inspiratory<br>Volume/Body<br>Surface Area,<br>Low-Dose<br>Volumetric<br>Kurtosis,<br>Low-Dose<br>Volumetric Mean<br>Lung Attenuation,<br>Low-Dose<br>Volumetric Total<br>Lung Skewness,<br>Total Mean Lung<br>Attenuation,<br>Total Lung<br>Kurtosis,<br>Total Lung<br>Skewness,<br>Warrick Total<br>Score (0-30)) | Cross-<br>Sectional           | DLCO%,<br>TLC%                     |

Abbreviations: % = Percent Predicted; DLCO = Diffusing Capacity for Carbon Monoxide; DLCO/VA = Diffusing Capacity for Carbon Monoxide Corrected for Alveolar Volume; DLCOcorr = Diffusing Capacity for Carbon Monoxide Corrected for Haemoglobin; DLCOcorr/VA = Diffusing Capacity for Carbon Monoxide Corrected for Alveolar Volume and Haemoglobin; FEV<sub>1</sub> = Forced Expiratory Volume in the 1<sup>st</sup> Second of Forced Exhalation; FRC = Functional Residual Capacity; FVC = Forced Vital Capacity; HRCT = High-Resolution Computed Tomography; ILD = Interstitial Lung Disease; N/R = Not Reported; PFT = Pulmonary Function Test; RV = Residual Volume; TLC = Total Lung Capacity; VC = Vital Capacity

| <b>Record</b>                       | <b>Country</b>   | <b>Study Design<br/>(SSc<br/>Recruitment<br/>Method/Site)</b>                                                       | <b>SSc<br/>Subjects in<br/>Study<br/>(%<br/>Female)</b> | <b>Age,<br/>Years<br/>(Range)</b> | <b>Gold Standard<br/>(Scoring Method)</b>                                                                                             | <b>Type of<br/>Validation</b> | <b>PFT Measures<br/>Considered</b>                                        |
|-------------------------------------|------------------|---------------------------------------------------------------------------------------------------------------------|---------------------------------------------------------|-----------------------------------|---------------------------------------------------------------------------------------------------------------------------------------|-------------------------------|---------------------------------------------------------------------------|
| Beretta et al.<br>2007[182]         | Italy            | Cross-Sectional<br>Study<br>(Centre of<br>Expertise for<br>Systemic<br>Autoimmune<br>Diseases<br>Outpatient Clinic) | 28<br>(82%<br>Female)                                   | 52.2 ±<br>10.6                    | HRCT<br>(Warrick Total<br>Score (0-30))                                                                                               | Cross-<br>Sectional           | DLCOcorr%,<br>FVC%,<br>TLC%                                               |
| Camiciottoli<br>et al.<br>2007[183] | Italy            | Cross-Sectional<br>Study                                                                                            | 48<br>(88%<br>Female)                                   | 57 ± 13<br>(18-80)                | HRCT<br>(Total Lung<br>Kurtosis,<br>Total Lung<br>Skewness,<br>Total Mean Lung<br>Attenuation,<br>Warrick Total<br>Score (0-30))      | Cross-<br>Sectional           | DLCO%,<br>FEV <sub>1</sub> %,<br>FRC%,<br>FVC%                            |
| Goldin et al.<br>2008[184]          | United<br>States | Cross-Sectional<br>Study<br>(Scleroderma<br>Lung Study I<br>(SLS I))                                                | 162<br>(70%<br>Female)                                  | 51 ± 12.3                         | HRCT<br>(Global Fibrosis<br>Score (0-4),<br>Global Ground-<br>Glass Opacity<br>Score (0-4),<br>Global<br>Honeycombing<br>Score (0-4)) | Cross-<br>Sectional           | DLCO%,<br>FEV <sub>1</sub> %,<br>FEV <sub>1</sub> /FVC%,<br>FVC%,<br>TLC% |

Abbreviations: % = Percent Predicted; DLCO = Diffusing Capacity for Carbon Monoxide; DLCO/VA = Diffusing Capacity for Carbon Monoxide Corrected for Alveolar Volume; DLCOcorr = Diffusing Capacity for Carbon Monoxide Corrected for Haemoglobin; DLCOcorr/VA = Diffusing Capacity for Carbon Monoxide Corrected for Alveolar Volume and Haemoglobin; FEV<sub>1</sub> = Forced Expiratory Volume in the 1<sup>st</sup> Second of Forced Exhalation; FRC = Functional Residual Capacity; FVC = Forced Vital Capacity; HRCT = High-Resolution Computed Tomography; ILD = Interstitial Lung Disease; N/R = Not Reported; PFT = Pulmonary Function Test; RV = Residual Volume; TLC = Total Lung Capacity; VC = Vital Capacity



| <b>Record</b>              | <b>Country</b>     | <b>Study Design<br/>(SSc<br/>Recruitment<br/>Method/Site)</b>                                                                                                      | <b>SSc<br/>Subjects in<br/>Study<br/>(%<br/>Female)</b> | <b>Age,<br/>Years<br/>(Range)</b> | <b>Gold Standard<br/>(Scoring Method)</b>                                                                                                                                                | <b>Type of<br/>Validation</b> | <b>PFT Measures<br/>Considered</b>    |
|----------------------------|--------------------|--------------------------------------------------------------------------------------------------------------------------------------------------------------------|---------------------------------------------------------|-----------------------------------|------------------------------------------------------------------------------------------------------------------------------------------------------------------------------------------|-------------------------------|---------------------------------------|
| Bellia et al.<br>2009[185] | Italy              | Cross-Sectional<br>Study<br>(Department of<br>Rheumatology)                                                                                                        | 31<br>(97%<br>Female)                                   | 54 ± 10.4                         | HRCT<br>(Warrick Alveolitis<br>Index (0-4),<br>Warrick Extent<br>Score (1-3),<br>Warrick Fibrosis<br>Index (0-26),<br>Warrick Severity<br>Score (1-5),<br>Warrick Total<br>Score (0-30)) | Cross-<br>Sectional           | DLCO%,<br>FEV <sub>1</sub> %,<br>TLC% |
| Goldin et al.<br>2009[186] | United<br>States   | Cohort Study<br>(Scleroderma<br>Lung Study I<br>(SLS I))                                                                                                           | 98<br>(74%<br>Female)                                   | 46.6                              | HRCT<br>(Global Fibrosis<br>Score (0-4))                                                                                                                                                 | Longitudinal                  | DLCO%,<br>FVC%,<br>TLC%               |
| Vonk et al.<br>2009[187]   | The<br>Netherlands | Cross-Sectional<br>Study<br>(Pulmonary<br>Hypertension<br>Screening, a<br>Multidisciplinary<br>Approach in<br>Scleroderma<br>(POEMAS) and<br>Nationwide<br>Survey) | 1,000                                                   | N/R                               | HRCT<br>(Scoring Not<br>Reported)                                                                                                                                                        | Cross-<br>Sectional           | TLC%                                  |

Abbreviations: % = Percent Predicted; DLCO = Diffusing Capacity for Carbon Monoxide; DLCO/VA = Diffusing Capacity for Carbon Monoxide Corrected for Alveolar Volume; DLCOcorr = Diffusing Capacity for Carbon Monoxide Corrected for Haemoglobin; DLCOcorr/VA = Diffusing Capacity for Carbon Monoxide Corrected for Alveolar Volume and Haemoglobin; FEV<sub>1</sub> = Forced Expiratory Volume in the 1<sup>st</sup> Second of Forced Exhalation; FRC = Functional Residual Capacity; FVC = Forced Vital Capacity; HRCT = High-Resolution Computed Tomography; ILD = Interstitial Lung Disease; N/R = Not Reported; PFT = Pulmonary Function Test; RV = Residual Volume; TLC = Total Lung Capacity; VC = Vital Capacity

| <b>Record</b>                        | <b>Country</b> | <b>Study Design<br/>(SSc<br/>Recruitment<br/>Method/Site)</b>                              | <b>SSc<br/>Subjects in<br/>Study<br/>(%<br/>Female)</b> | <b>Age,<br/>Years<br/>(Range)</b> | <b>Gold Standard<br/>(Scoring Method)</b>                  | <b>Type of<br/>Validation</b> | <b>PFT Measures<br/>Considered</b>    |
|--------------------------------------|----------------|--------------------------------------------------------------------------------------------|---------------------------------------------------------|-----------------------------------|------------------------------------------------------------|-------------------------------|---------------------------------------|
| Ananyeva et al. 2010[188] (Abstract) | Russia         | Cross-Sectional Study                                                                      | 138 (90% Female)                                        | 47 ± 13                           | HRCT (Extent of Lung Involvement – Scoring Not Reported)   | Cross-Sectional               | DLCO%, FVC%                           |
| Gilson et al. 2010[64]               | France         | Cohort Study (Department of Rheumatology)                                                  | 105 (86% Female)                                        | 52.7 ± 11.8                       | HRCT (Wells Total Score (0-3))                             | Longitudinal                  | FVC%                                  |
| Peng et al. 2010[189] (Abstract)     | China          | Cross-Sectional Study (Scleroderma Study of Peking Union Medical College Hospital (PUMCH)) | 68                                                      | N/R                               | HRCT (Extent of Lung Involvement – Scoring Not Reported)   | Cross-Sectional               | DLCO%, FVC%, TLC%                     |
| Kim et al. 2011[190] (Abstract)      | United States  | Cross-Sectional Study (Anonymized Research Database)                                       | 119                                                     | 48 ± 10.6                         | HRCT (Quantitative Percentage with Fibrosis in Whole Lung) | Cross-Sectional               | DLCO%, FEV <sub>1</sub> %, FVC%, TLC% |

Abbreviations: % = Percent Predicted; DLCO = Diffusing Capacity for Carbon Monoxide; DLCO/VA = Diffusing Capacity for Carbon Monoxide Corrected for Alveolar Volume; DLCOcorr = Diffusing Capacity for Carbon Monoxide Corrected for Haemoglobin; DLCOcorr/VA = Diffusing Capacity for Carbon Monoxide Corrected for Alveolar Volume and Haemoglobin; FEV<sub>1</sub> = Forced Expiratory Volume in the 1<sup>st</sup> Second of Forced Exhalation; FRC = Functional Residual Capacity; FVC = Forced Vital Capacity; HRCT = High-Resolution Computed Tomography; ILD = Interstitial Lung Disease; N/R = Not Reported; PFT = Pulmonary Function Test; RV = Residual Volume; TLC = Total Lung Capacity; VC = Vital Capacity

| <b>Record</b>                           | <b>Country</b>   | <b>Study Design<br/>(SSc<br/>Recruitment<br/>Method/Site)</b> | <b>SSc<br/>Subjects in<br/>Study<br/>(%<br/>Female)</b> | <b>Age,<br/>Years<br/>(Range)</b> | <b>Gold Standard<br/>(Scoring Method)</b>                                                                                                                      | <b>Type of<br/>Validation</b> | <b>PFT Measures<br/>Considered</b>                                          |
|-----------------------------------------|------------------|---------------------------------------------------------------|---------------------------------------------------------|-----------------------------------|----------------------------------------------------------------------------------------------------------------------------------------------------------------|-------------------------------|-----------------------------------------------------------------------------|
| Kim et al.<br>2011[191]                 | United<br>States | Cohort Study<br>(Scleroderma<br>Lung Study I<br>(SLS I))      | 83                                                      | N/R                               | HRCT<br>(Quantitative<br>Percentage with<br>Fibrosis in Highest<br>Score Zone at<br>Baseline,<br>Quantitative<br>Percentage with<br>Fibrosis in Whole<br>Lung) | Longitudinal                  | FVC%,<br>TLC%                                                               |
| Moghadam et<br>al. 2011[192]            | Iran             | Cross-Sectional<br>Study<br>(Rheumatology<br>Research Center) | 55<br>(91%<br>Female)                                   | 38.4 ±<br>1.3<br>(17–63)          | HRCT<br>(Wells Total Score<br>(0-4))                                                                                                                           | Cross-<br>Sectional           | DLCO Absolute,<br>DLCO%,<br>FVC Absolute,<br>FVC%,<br>TLC Absolute,<br>TLC% |
| Parra et al.<br>2011[193]<br>(Abstract) | Brazil           | Cross-Sectional<br>Study                                      | 30<br>(77%<br>Female)                                   | N/R                               | HRCT<br>(Extent of Lung<br>Involvement –<br>Scoring Not<br>Reported)                                                                                           | Cross-<br>Sectional           | DLCO%                                                                       |

Abbreviations: % = Percent Predicted; DLCO = Diffusing Capacity for Carbon Monoxide; DLCO/VA = Diffusing Capacity for Carbon Monoxide Corrected for Alveolar Volume; DLCOcorr = Diffusing Capacity for Carbon Monoxide Corrected for Haemoglobin; DLCOcorr/VA = Diffusing Capacity for Carbon Monoxide Corrected for Alveolar Volume and Haemoglobin; FEV<sub>1</sub> = Forced Expiratory Volume in the 1<sup>st</sup> Second of Forced Exhalation; FRC = Functional Residual Capacity; FVC = Forced Vital Capacity; HRCT = High-Resolution Computed Tomography; ILD = Interstitial Lung Disease; N/R = Not Reported; PFT = Pulmonary Function Test; RV = Residual Volume; TLC = Total Lung Capacity; VC = Vital Capacity

| <b>Record</b>                             | <b>Country</b> | <b>Study Design<br/>(SSc<br/>Recruitment<br/>Method/Site)</b>                                  | <b>SSc<br/>Subjects in<br/>Study<br/>(%<br/>Female)</b> | <b>Age,<br/>Years<br/>(Range)</b> | <b>Gold Standard<br/>(Scoring Method)</b>                                                                                                                                 | <b>Type of<br/>Validation</b> | <b>PFT Measures<br/>Considered</b> |
|-------------------------------------------|----------------|------------------------------------------------------------------------------------------------|---------------------------------------------------------|-----------------------------------|---------------------------------------------------------------------------------------------------------------------------------------------------------------------------|-------------------------------|------------------------------------|
| Assayag et al.<br>2012[194]<br>(Abstract) | Canada         | Cross-Sectional<br>Study<br>(Canadian<br>Scleroderma<br>Research Group<br>(CSRG))              | 54<br>(89%<br>Female)                                   | 58.5                              | HRCT<br>(Global Fibrosis<br>Score (0-4),<br>Global Ground-<br>Glass Opacity<br>Score (0-4),<br>Global<br>Honeycombing<br>Score (0-4),<br>Global Severity<br>Score (0-12)) | Cross-<br>Sectional           | DLCO%,<br>FVC%                     |
| Mantero et al.<br>2012[195]<br>(Abstract) | Italy          | Case-Control<br>Study                                                                          | 32<br>(84%<br>Female)                                   | 62.5<br>(59-73)                   | HRCT<br>(Extent of Lung<br>Involvement –<br>Scoring Not<br>Reported)                                                                                                      | Cross-<br>Sectional           | FVC%                               |
| Mittal et al.<br>2012[196]<br>(Abstract)  | India          | Cross-Sectional<br>Study                                                                       | 23<br>(91%<br>Female)                                   | 35.3 ±<br>9.9                     | HRCT<br>(Total Score (0-<br>24))                                                                                                                                          | Cross-<br>Sectional           | FVC%                               |
| Pernot et al.<br>2012[197]                | France         | Case-Control<br>Study<br>(Department of<br>Dermatology,<br>Department of<br>Internal Medicine) | 35<br>(83%<br>Female)                                   | 60.1                              | HRCT<br>(Absence/Presence<br>of ILD)                                                                                                                                      | Cross-<br>Sectional           | DLCO%                              |

Abbreviations: % = Percent Predicted; DLCO = Diffusing Capacity for Carbon Monoxide; DLCO/VA = Diffusing Capacity for Carbon Monoxide Corrected for Alveolar Volume; DLCOcorr = Diffusing Capacity for Carbon Monoxide Corrected for Haemoglobin; DLCOcorr/VA = Diffusing Capacity for Carbon Monoxide Corrected for Alveolar Volume and Haemoglobin; FEV<sub>1</sub> = Forced Expiratory Volume in the 1<sup>st</sup> Second of Forced Exhalation; FRC = Functional Residual Capacity; FVC = Forced Vital Capacity; HRCT = High-Resolution Computed Tomography; ILD = Interstitial Lung Disease; N/R = Not Reported; PFT = Pulmonary Function Test; RV = Residual Volume; TLC = Total Lung Capacity; VC = Vital Capacity

| <b>Record</b>                                   | <b>Country</b> | <b>Study Design<br/>(SSc<br/>Recruitment<br/>Method/Site)</b>                                    | <b>SSc<br/>Subjects in<br/>Study<br/>(%<br/>Female)</b> | <b>Age,<br/>Years<br/>(Range)</b> | <b>Gold Standard<br/>(Scoring Method)</b>                                                                      | <b>Type of<br/>Validation</b> | <b>PFT Measures<br/>Considered</b>                         |
|-------------------------------------------------|----------------|--------------------------------------------------------------------------------------------------|---------------------------------------------------------|-----------------------------------|----------------------------------------------------------------------------------------------------------------|-------------------------------|------------------------------------------------------------|
| Perrin et al.<br>2012[198]<br>(Abstract)        | France         | Cross-Sectional<br>Study                                                                         | 72                                                      | N/R                               | HRCT<br>(Absence/Presence<br>of ILD)                                                                           | Cross-<br>Sectional           | DLCO%                                                      |
| Wilsher et al.<br>2012[199]                     | New<br>Zealand | Cross-Sectional<br>Study<br>(Rheumatology<br>Clinics)                                            | 30<br>(80%<br>Female)                                   | 47 ± 12<br>(18-70)                | HRCT<br>(Total Extent of<br>Ground-Glass<br>Opacity (0-24),<br>Total Extent of<br>Reticular Pattern<br>(0-24)) | Cross-<br>Sectional           | DLCO%,<br>FEV <sub>1</sub> %,<br>VC%                       |
| Zimmermann<br>et al.<br>2012[200]<br>(Abstract) | Brazil         | Cross-Sectional<br>Study                                                                         | 45                                                      | N/R                               | HRCT<br>(Tomographic<br>Index)                                                                                 | Cross-<br>Sectional           | DLCO,<br>Final Expiratory<br>Volume,<br>FVC,<br>RV,<br>TLC |
| Celeste et al.<br>2013[100]                     | Italy          | Cohort Study<br>(Outpatient Clinic<br>Referral Center<br>for Systemic<br>Autoimmune<br>Diseases) | 221<br>(90%<br>Female)                                  | 45.5                              | HRCT<br>(Nearest 5% -<br>Overall Lung<br>Involvement)                                                          | Cross-<br>Sectional           | DLCO%,<br>FVC%                                             |
| Gatta et al.<br>2013[201]                       | Italy          | Cross-Sectional<br>Study<br>(Hospital<br>Information<br>System)                                  | 42<br>(14%<br>Female)                                   | 48<br>(27-66)                     | HRCT<br>(Modified Warrick<br>Total Score (0-<br>115))                                                          | Cross-<br>Sectional           | DLCO%,<br>DLCO/VA%,<br>FVC%,<br>TLC%                       |

Abbreviations: % = Percent Predicted; DLCO = Diffusing Capacity for Carbon Monoxide; DLCO/VA = Diffusing Capacity for Carbon Monoxide Corrected for Alveolar Volume; DLCOcorr = Diffusing Capacity for Carbon Monoxide Corrected for Haemoglobin; DLCOcorr/VA = Diffusing Capacity for Carbon Monoxide Corrected for Alveolar Volume and Haemoglobin; FEV<sub>1</sub> = Forced Expiratory Volume in the 1<sup>st</sup> Second of Forced Exhalation; FRC = Functional Residual Capacity; FVC = Forced Vital Capacity; HRCT = High-Resolution Computed Tomography; ILD = Interstitial Lung Disease; N/R = Not Reported; PFT = Pulmonary Function Test; RV = Residual Volume; TLC = Total Lung Capacity; VC = Vital Capacity

| <b>Record</b>                          | <b>Country</b> | <b>Study Design<br/>(SSc<br/>Recruitment<br/>Method/Site)</b>                                            | <b>SSc<br/>Subjects in<br/>Study<br/>(%<br/>Female)</b> | <b>Age,<br/>Years<br/>(Range)</b> | <b>Gold Standard<br/>(Scoring Method)</b>                                                                                                                                | <b>Type of<br/>Validation</b> | <b>PFT Measures<br/>Considered</b>                |
|----------------------------------------|----------------|----------------------------------------------------------------------------------------------------------|---------------------------------------------------------|-----------------------------------|--------------------------------------------------------------------------------------------------------------------------------------------------------------------------|-------------------------------|---------------------------------------------------|
| Nguyen-Kim et al. 2013[202] (Abstract) | Switzerland    | Cross-Sectional Study                                                                                    | 37 (95% Female)                                         | 57 ± 12.5                         | HRCT (Total Lung Kurtosis, Total Lung Skewness)                                                                                                                          | Cross-Sectional               | DLCO, FEV <sub>1</sub> , FVC, TLC                 |
| Piorunek et al. 2013[203]              | Poland         | Cross-Sectional Study                                                                                    | 37 (84% Female)                                         | 43.2 ± 13.9                       | HRCT (Warrick Total Score (0-30))                                                                                                                                        | Cross-Sectional               | DLCO%                                             |
| Zamora et al. 2013[204] (Abstract)     | United States  | Cross-Sectional Study (Pulmonary Hypertension Recognition and Outcomes in Scleroderma (PHAROS) Registry) | 336                                                     | N/R                               | HRCT (Total Extent of Fibrosis – Scoring Not Reported, Total Extent of Ground-Glass Opacity – Scoring Not Reported, Total Extent of Honeycombing – Scoring Not Reported) | Cross-Sectional               | DLCO%, FVC%, TLC%                                 |
| Colaci et al. 2014[205]                | Italy          | Cross-Sectional Study (Rheumatology Centre)                                                              | 107 (81% Female)                                        | 52.1 ± 12.3                       | HRCT (Modified Schurawitzki Total Score (0-18))                                                                                                                          | Cross-Sectional               | DLCOcorr/VA%, FEV <sub>1</sub> %, FVC%, TLC%, VC% |

Abbreviations: % = Percent Predicted; DLCO = Diffusing Capacity for Carbon Monoxide; DLCO/VA = Diffusing Capacity for Carbon Monoxide Corrected for Alveolar Volume; DLCOcorr = Diffusing Capacity for Carbon Monoxide Corrected for Haemoglobin; DLCOcorr/VA = Diffusing Capacity for Carbon Monoxide Corrected for Alveolar Volume and Haemoglobin; FEV<sub>1</sub> = Forced Expiratory Volume in the 1<sup>st</sup> Second of Forced Exhalation; FRC = Functional Residual Capacity; FVC = Forced Vital Capacity; HRCT = High-Resolution Computed Tomography; ILD = Interstitial Lung Disease; N/R = Not Reported; PFT = Pulmonary Function Test; RV = Residual Volume; TLC = Total Lung Capacity; VC = Vital Capacity

| <b>Record</b>                         | <b>Country</b> | <b>Study Design<br/>(SSc<br/>Recruitment<br/>Method/Site)</b>                    | <b>SSc<br/>Subjects in<br/>Study<br/>(%<br/>Female)</b> | <b>Age,<br/>Years<br/>(Range)</b> | <b>Gold Standard<br/>(Scoring Method)</b>                                                                                                                                                                                                  | <b>Type of<br/>Validation</b> | <b>PFT Measures<br/>Considered</b> |
|---------------------------------------|----------------|----------------------------------------------------------------------------------|---------------------------------------------------------|-----------------------------------|--------------------------------------------------------------------------------------------------------------------------------------------------------------------------------------------------------------------------------------------|-------------------------------|------------------------------------|
| Ariani et al. 2015[206]               | Italy          | Cross-Sectional Study (Units of Rheumatology)                                    | 257 (91% Female)                                        | 60.0 ± 13.4                       | HRCT (Fibrosis Ratio, Parenchymal Kurtosis, Parenchymal Mean Lung Attenuation, Parenchymal Skewness, Parenchymal Standard Deviation, Total Lung Kurtosis, Total Lung Skewness, Total Mean Lung Attenuation, Total Lung Standard Deviation) | Cross-Sectional               | DLCO%, DLCO/VA%, FVC%, TLC%        |
| Bernstein et al. 2015[207] (Abstract) | United States  | Cross-Sectional Study (Prospective Registry of Early Systemic Sclerosis (PRESS)) | 91 (68% Female)                                         | 52.0 ± 15.3                       | HRCT (Absence/Presence of ILD)                                                                                                                                                                                                             | Cross-Sectional               | DLCO%, FVC%, TLC%                  |

Abbreviations: % = Percent Predicted; DLCO = Diffusing Capacity for Carbon Monoxide; DLCO/VA = Diffusing Capacity for Carbon Monoxide Corrected for Alveolar Volume; DLCOcorr = Diffusing Capacity for Carbon Monoxide Corrected for Haemoglobin; DLCOcorr/VA = Diffusing Capacity for Carbon Monoxide Corrected for Alveolar Volume and Haemoglobin; FEV<sub>1</sub> = Forced Expiratory Volume in the 1<sup>st</sup> Second of Forced Exhalation; FRC = Functional Residual Capacity; FVC = Forced Vital Capacity; HRCT = High-Resolution Computed Tomography; ILD = Interstitial Lung Disease; N/R = Not Reported; PFT = Pulmonary Function Test; RV = Residual Volume; TLC = Total Lung Capacity; VC = Vital Capacity

| <b>Record</b>                        | <b>Country</b> | <b>Study Design<br/>(SSc<br/>Recruitment<br/>Method/Site)</b>                         | <b>SSc<br/>Subjects in<br/>Study<br/>(%<br/>Female)</b> | <b>Age,<br/>Years<br/>(Range)</b> | <b>Gold Standard<br/>(Scoring Method)</b>                | <b>Type of<br/>Validation</b> | <b>PFT Measures<br/>Considered</b> |
|--------------------------------------|----------------|---------------------------------------------------------------------------------------|---------------------------------------------------------|-----------------------------------|----------------------------------------------------------|-------------------------------|------------------------------------|
| Ghandour et al. 2015[208] (Abstract) | Egypt          | Cross-Sectional Study (Outpatient Clinic of Rheumatology & Rehabilitation Department) | 40 (100% Female)                                        | (17-57)                           | HRCT (Extent of Lung Involvement – Scoring Not Reported) | Cross-Sectional               | FEV <sub>1</sub> /FVC%, FVC%       |
| Guarnieri et al. 2015[209]           | Italy          | Case-Control Study (Outpatient Clinic of Rheumatology Unit)                           | 37 (81% Female)                                         | 54                                | HRCT (Global Severity Score (0-12))                      | Cross-Sectional               | DLCO%                              |

Abbreviations: % = Percent Predicted; DLCO = Diffusing Capacity for Carbon Monoxide; DLCO/VA = Diffusing Capacity for Carbon Monoxide Corrected for Alveolar Volume; DLCOcorr = Diffusing Capacity for Carbon Monoxide Corrected for Haemoglobin; DLCOcorr/VA = Diffusing Capacity for Carbon Monoxide Corrected for Alveolar Volume and Haemoglobin; FEV<sub>1</sub> = Forced Expiratory Volume in the 1<sup>st</sup> Second of Forced Exhalation; FRC = Functional Residual Capacity; FVC = Forced Vital Capacity; HRCT = High-Resolution Computed Tomography; ILD = Interstitial Lung Disease; N/R = Not Reported; PFT = Pulmonary Function Test; RV = Residual Volume; TLC = Total Lung Capacity; VC = Vital Capacity



| <b>Record</b>              | <b>Country</b>   | <b>Study Design<br/>(SSc<br/>Recruitment<br/>Method/Site)</b> | <b>SSc<br/>Subjects in<br/>Study<br/>(%<br/>Female)</b> | <b>Age,<br/>Years<br/>(Range)</b> | <b>Gold Standard<br/>(Scoring Method)</b>                                                                                                                                                                                                                                                                                                                                                                                                                                          | <b>Type of<br/>Validation</b> | <b>PFT Measures<br/>Considered</b> |
|----------------------------|------------------|---------------------------------------------------------------|---------------------------------------------------------|-----------------------------------|------------------------------------------------------------------------------------------------------------------------------------------------------------------------------------------------------------------------------------------------------------------------------------------------------------------------------------------------------------------------------------------------------------------------------------------------------------------------------------|-------------------------------|------------------------------------|
| Khanna et al.<br>2015[137] | United<br>States | Cohort Study<br>(Scleroderma<br>Lung Study I<br>(SLS I))      | 93<br>(73%<br>Female)                                   | 47.19 ±<br>11.72                  | HRCT<br>(Maximum<br>Fibrosis Score in<br>Zone of Maximal<br>Involvement (0-4),<br>Nearest 5% -<br>Overall Lung<br>Involvement,<br>Quantitative<br>Percentage with<br>Fibrosis in Whole<br>Lung,<br>Quantitative<br>Percentage with<br>Fibrosis in Zone of<br>Maximal<br>Involvement,<br>Quantitative Total<br>Extent of<br>Interstitial Lung<br>Disease in Whole<br>Lung,<br>Quantitative Total<br>Extent of<br>Interstitial Lung<br>Disease in Zone of<br>Maximal<br>Involvement) | Cross-<br>Sectional           | DLCO%,<br>FVC%                     |

Abbreviations: % = Percent Predicted; DLCO = Diffusing Capacity for Carbon Monoxide; DLCO/VA = Diffusing Capacity for Carbon Monoxide Corrected for Alveolar Volume; DLCOcorr = Diffusing Capacity for Carbon Monoxide Corrected for Haemoglobin; DLCOcorr/VA = Diffusing Capacity for Carbon Monoxide Corrected for Alveolar Volume and Haemoglobin; FEV<sub>1</sub> = Forced Expiratory Volume in the 1<sup>st</sup> Second of Forced Exhalation; FRC = Functional Residual Capacity; FVC = Forced Vital Capacity; HRCT = High-Resolution Computed Tomography; ILD = Interstitial Lung Disease; N/R = Not Reported; PFT = Pulmonary Function Test; RV = Residual Volume; TLC = Total Lung Capacity; VC = Vital Capacity

| <b>Record</b>                         | <b>Country</b>  | <b>Study Design<br/>(SSc<br/>Recruitment<br/>Method/Site)</b>                                                      | <b>SSc<br/>Subjects in<br/>Study<br/>(%<br/>Female)</b> | <b>Age,<br/>Years<br/>(Range)</b> | <b>Gold Standard<br/>(Scoring Method)</b>                                                         | <b>Type of<br/>Validation</b>        | <b>PFT Measures<br/>Considered</b>    |
|---------------------------------------|-----------------|--------------------------------------------------------------------------------------------------------------------|---------------------------------------------------------|-----------------------------------|---------------------------------------------------------------------------------------------------|--------------------------------------|---------------------------------------|
| Kim et al.<br>2015[210]<br>(Abstract) | United States   | Cohort Study<br>(Scleroderma<br>Lung Study I<br>(SLS I))                                                           | 76                                                      | N/R                               | HRCT<br>(Quantitative<br>Percentage with<br>Fibrosis in Whole<br>Lung,<br>Total Lung<br>Kurtosis) | Cross-<br>Sectional,<br>Longitudinal | DLCO%,<br>FVC%                        |
| Ninaber et al.<br>2015[144]           | The Netherlands | Cohort Study<br>(Referrals to<br>Tertiary<br>Outpatient<br>Targeted<br>Multidisciplinary<br>Healthcare<br>Program) | 41<br>(76%<br>Female)                                   | 50.9                              | HRCT<br>(% High<br>Attenuation Areas,<br>85 <sup>th</sup> Percentile<br>Density Score)            | Cross-<br>Sectional                  | DLCO%,<br>FVC%                        |
| Salaffi et al.<br>2015[211]           | Italy           | Cross-Sectional<br>Study                                                                                           | 79<br>(85%<br>Female)                                   | 59 ± 9.7                          | HRCT<br>(Computer-Aided<br>Method Pulmonary<br>Fibrosis Fraction<br>(%))                          | Cross-<br>Sectional                  | DLCO%,<br>FEV <sub>1</sub> %,<br>FVC% |
| Suliman et al.<br>2015[150]           | Switzerland     | Cohort Study<br>(Division of<br>Rheumatology)                                                                      | 102<br>(77%<br>Female)                                  | 58.5<br>(28-90)                   | HRCT<br>(Absence/Presence<br>of ILD)                                                              | Cross-<br>Sectional                  | DLCOcorr%,<br>FVC%,<br>TLC%           |

Abbreviations: % = Percent Predicted; DLCO = Diffusing Capacity for Carbon Monoxide; DLCO/VA = Diffusing Capacity for Carbon Monoxide Corrected for Alveolar Volume; DLCOcorr = Diffusing Capacity for Carbon Monoxide Corrected for Haemoglobin; DLCOcorr/VA = Diffusing Capacity for Carbon Monoxide Corrected for Alveolar Volume and Haemoglobin; FEV<sub>1</sub> = Forced Expiratory Volume in the 1<sup>st</sup> Second of Forced Exhalation; FRC = Functional Residual Capacity; FVC = Forced Vital Capacity; HRCT = High-Resolution Computed Tomography; ILD = Interstitial Lung Disease; N/R = Not Reported; PFT = Pulmonary Function Test; RV = Residual Volume; TLC = Total Lung Capacity; VC = Vital Capacity

| <b>Record</b>                | <b>Country</b> | <b>Study Design (SSc Recruitment Method/Site)</b>                                            | <b>SSc Subjects in Study (% Female)</b> | <b>Age, Years (Range)</b> | <b>Gold Standard (Scoring Method)</b>                                                                                     | <b>Type of Validation</b> | <b>PFT Measures Considered</b>                     |
|------------------------------|----------------|----------------------------------------------------------------------------------------------|-----------------------------------------|---------------------------|---------------------------------------------------------------------------------------------------------------------------|---------------------------|----------------------------------------------------|
| Antoniou et al. 2016[212]    | United Kingdom | Cross-Sectional Study (Hospital Records, Centre for Rheumatology and Pulmonary Hypertension) | 333 (78% Female)                        | 54.4 ± 13.1               | HRCT (Nearest 5% - Overall Lung Involvement)                                                                              | Cross-Sectional           | DLCO%, FEV <sub>1</sub> %, FVC%, FVC/DLCO Absolute |
| Cetincakmak et al. 2016[213] | Turkey         | Cross-Sectional Study (Referrals to Department of Radiology Clinic)                          | 38 (95% Female)                         | 41                        | HRCT (Left Percentage of Lower Lobe Volume, Right Percentage of Lower Lobe Volume, Total Percentage of Lower Lobe Volume) | Cross-Sectional           | DLCOcorr%, FEV <sub>1</sub> /FVC%, FVC%            |
| Kloth et al. 2016[158]       | Germany        | Cohort Study (Radiology Department Database)                                                 | 26 (54% Female)                         | 37.45 ± 9.83 (11-51)      | HRCT (Mean Lung Density)                                                                                                  | Longitudinal              | FEV <sub>1</sub>                                   |
| Salaffi et al. 2016[214]     | Italy          | Cross-Sectional Study (Department of Rheumatology)                                           | 126 (84% Female)                        | 60.68 ± 10.74 (22-78)     | HRCT (Computer-Aided Method Pulmonary Fibrosis Fraction (%))                                                              | Cross-Sectional           | DLCO%, FVC%                                        |
| Tashkin et al.               | United         | Cross-Sectional                                                                              | 300                                     | 50.3                      | HRCT                                                                                                                      | Cross-                    | DLCOcorr%,                                         |

Abbreviations: % = Percent Predicted; DLCO = Diffusing Capacity for Carbon Monoxide; DLCO/VA = Diffusing Capacity for Carbon Monoxide Corrected for Alveolar Volume; DLCOcorr = Diffusing Capacity for Carbon Monoxide Corrected for Haemoglobin; DLCOcorr/VA = Diffusing Capacity for Carbon Monoxide Corrected for Alveolar Volume and Haemoglobin; FEV<sub>1</sub> = Forced Expiratory Volume in the 1<sup>st</sup> Second of Forced Exhalation; FRC = Functional Residual Capacity; FVC = Forced Vital Capacity; HRCT = High-Resolution Computed Tomography; ILD = Interstitial Lung Disease; N/R = Not Reported; PFT = Pulmonary Function Test; RV = Residual Volume; TLC = Total Lung Capacity; VC = Vital Capacity

| <b>Record</b> | <b>Country</b> | <b>Study Design<br/>(SSc<br/>Recruitment<br/>Method/Site)</b>                               | <b>SSc<br/>Subjects in<br/>Study<br/>(%<br/>Female)</b> | <b>Age,<br/>Years<br/>(Range)</b> | <b>Gold Standard<br/>(Scoring Method)</b>                                                                                                                                                                                                                                                                                                                                                                                                                            | <b>Type of<br/>Validation</b> | <b>PFT Measures<br/>Considered</b>       |
|---------------|----------------|---------------------------------------------------------------------------------------------|---------------------------------------------------------|-----------------------------------|----------------------------------------------------------------------------------------------------------------------------------------------------------------------------------------------------------------------------------------------------------------------------------------------------------------------------------------------------------------------------------------------------------------------------------------------------------------------|-------------------------------|------------------------------------------|
| 2016[215]     | States         | Study<br>(Scleroderma<br>Lung Study I<br>(SLS I),<br>Scleroderma Lung<br>Study II (SLS II)) | (72%<br>Female)                                         |                                   | (Quantitative<br>Ground-Glass<br>Opacity in Whole<br>Lung,<br>Quantitative<br>Ground-Glass<br>Opacity in Zone of<br>Maximal<br>Involvement,<br>Quantitative<br>Percentage with<br>Fibrosis in Whole<br>Lung,<br>Quantitative<br>Percentage with<br>Fibrosis in Zone of<br>Maximal<br>Involvement,<br>Quantitative Total<br>Extent of<br>Interstitial Lung<br>Disease in Whole<br>Lung,<br>Quantitative Total<br>Extent of<br>Interstitial Lung<br>Disease in Zone of | Sectional                     | FEV <sub>1</sub> /FVC%,<br>FVC%,<br>TLC% |

Abbreviations: % = Percent Predicted; DLCO = Diffusing Capacity for Carbon Monoxide; DLCO/VA = Diffusing Capacity for Carbon Monoxide Corrected for Alveolar Volume; DLCOcorr = Diffusing Capacity for Carbon Monoxide Corrected for Haemoglobin; DLCOcorr/VA = Diffusing Capacity for Carbon Monoxide Corrected for Alveolar Volume and Haemoglobin; FEV<sub>1</sub> = Forced Expiratory Volume in the 1<sup>st</sup> Second of Forced Exhalation; FRC = Functional Residual Capacity; FVC = Forced Vital Capacity; HRCT = High-Resolution Computed Tomography; ILD = Interstitial Lung Disease; N/R = Not Reported; PFT = Pulmonary Function Test; RV = Residual Volume; TLC = Total Lung Capacity; VC = Vital Capacity

| <b>Record</b> | <b>Country</b> | <b>Study Design<br/>(SSc<br/>Recruitment<br/>Method/Site)</b> | <b>SSc<br/>Subjects in<br/>Study<br/>(%<br/>Female)</b> | <b>Age,<br/>Years<br/>(Range)</b> | <b>Gold Standard<br/>(Scoring Method)</b> | <b>Type of<br/>Validation</b> | <b>PFT Measures<br/>Considered</b> |
|---------------|----------------|---------------------------------------------------------------|---------------------------------------------------------|-----------------------------------|-------------------------------------------|-------------------------------|------------------------------------|
|               |                |                                                               |                                                         |                                   | Maximal<br>Involvement)                   |                               |                                    |

Abbreviations: % = Percent Predicted; DLCO = Diffusing Capacity for Carbon Monoxide; DLCO/VA = Diffusing Capacity for Carbon Monoxide Corrected for Alveolar Volume; DLCOcorr = Diffusing Capacity for Carbon Monoxide Corrected for Haemoglobin; DLCOcorr/VA = Diffusing Capacity for Carbon Monoxide Corrected for Alveolar Volume and Haemoglobin; FEV<sub>1</sub> = Forced Expiratory Volume in the 1<sup>st</sup> Second of Forced Exhalation; FRC = Functional Residual Capacity; FVC = Forced Vital Capacity; HRCT = High-Resolution Computed Tomography; ILD = Interstitial Lung Disease; N/R = Not Reported; PFT = Pulmonary Function Test; RV = Residual Volume; TLC = Total Lung Capacity; VC = Vital Capacity

**e-APPENDIX 6: Results of the Validation Studies whose Aim was Other than to Validate Pulmonary Function Tests (N = 45).** The measures of validity are grouped alphabetically by scoring system used.

| <b>HRCT: % High Attenuation Areas</b>                   |                                                                         |
|---------------------------------------------------------|-------------------------------------------------------------------------|
| Ninaber et al. 2015[144]                                | DLCO%: $r = -0.48$ ( $p = 0.002$ )<br>FVC%: $r = -0.62$ ( $p < 0.001$ ) |
| <b>HRCT: 85<sup>th</sup> Percentile Density Score</b>   |                                                                         |
| Ninaber et al. 2015[144]                                | DLCO%: $r = -0.49$ ( $p = 0.001$ )<br>FVC%: $r = -0.64$ ( $p < 0.001$ ) |
| <b>HRCT: Absence/Presence of Pulmonary Fibrosis/ILD</b> |                                                                         |
| Han et al. 2003[179]<br>(Abstract)                      | DLCO% = 68%: AUC = 0.814                                                |
| Pernot et al. 2012[197]                                 | DLCO% = 67%: AUC = 0.75 ( $p = 0.005$ )<br>Se = 54%<br>Sp = 91%         |
| Perrin et al. 2012[198]<br>(Abstract)                   | DLCO% = Unclear: AUC = 0.67                                             |

Abbreviations: % = Percent Predicted; AUC = Area Under the Curve; CI = Confidence Interval; DLCO = Diffusing Capacity for Carbon Monoxide; DLCO/VA = Diffusing Capacity for Carbon Monoxide Corrected for Alveolar Volume; DLCOcorr = Diffusing Capacity for Carbon Monoxide Corrected for Haemoglobin; DLCOcorr/VA = Diffusing Capacity for Carbon Monoxide Corrected for Alveolar Volume and Haemoglobin; FRC = Functional Residual Capacity; FVC = Forced Vital Capacity; FEV1 = Forced Expiratory Volume in the 1<sup>st</sup> Second of Forced Exhalation; FNR = False Negative Rate; FPR = False Positive Rate; HRCT = High-Resolution Computed Tomography; ILD = Interstitial Lung Disease; LR- = Negative Likelihood Ratio; LR+ = Positive Likelihood Ratio; NPV = Negative Predictive Value; NS = Not Significant;  $p$  = p-value; PPV = Positive Predictive Value;  $R^2$  = Coefficient of Determination; RV = Residual Volume; Se = Sensitivity; Sp = Specificity; TLC = Total Lung Capacity; VC = Vital Capacity

|                                          |                                                                                                                                                                                                                                                                                                                                                                                   |
|------------------------------------------|-----------------------------------------------------------------------------------------------------------------------------------------------------------------------------------------------------------------------------------------------------------------------------------------------------------------------------------------------------------------------------------|
| Bernstein et al. 2015[207]<br>(Abstract) | DLCO% < 80%: Se = 86.4%<br>Sp = 60.0%<br>PPV = 70.4%<br>NPV = 80.0%<br>FVC% < 80%: Se = 56.0%<br>Sp = 55.0%<br>PPV = 60.9%<br>NPV = 50.0%<br>TLC% < 80%: Se = 52.9%<br>Sp = 70.6%<br>PPV = 64.3%<br>NPV = 60.0%<br>DLCO% & FVC% < 80%: Se = 90.9%<br>Sp = 45.0%<br>PPV = 64.5%<br>NPV = 81.8%<br>DLCO% & FVC & TLC% < 80%: Se = 88.2%<br>Sp = 47.1%<br>PPV = 62.5%<br>NPV = 80.0% |
|------------------------------------------|-----------------------------------------------------------------------------------------------------------------------------------------------------------------------------------------------------------------------------------------------------------------------------------------------------------------------------------------------------------------------------------|

Abbreviations: % = Percent Predicted; AUC = Area Under the Curve; CI = Confidence Interval; DLCO = Diffusing Capacity for Carbon Monoxide; DLCO/VA = Diffusing Capacity for Carbon Monoxide Corrected for Alveolar Volume; DLCOcorr = Diffusing Capacity for Carbon Monoxide Corrected for Haemoglobin; DLCOcorr/VA = Diffusing Capacity for Carbon Monoxide Corrected for Alveolar Volume and Haemoglobin; FRC = Functional Residual Capacity; FVC = Forced Vital Capacity; FEV1 = Forced Expiratory Volume in the 1<sup>st</sup> Second of Forced Exhalation; FNR = False Negative Rate; FPR = False Positive Rate; HRCT = High-Resolution Computed Tomography; ILD = Interstitial Lung Disease; LR- = Negative Likelihood Ratio; LR+ = Positive Likelihood Ratio; NPV = Negative Predictive Value; NS = Not Significant; p = p-value; PPV = Positive Predictive Value; R<sup>2</sup> = Coefficient of Determination; RV = Residual Volume; Se = Sensitivity; Sp = Specificity; TLC = Total Lung Capacity; VC = Vital Capacity

|                          |                                                                                                                                                                                                                                                                                                                                                                                                                                                                                                                                                                                                                                                                                                 |
|--------------------------|-------------------------------------------------------------------------------------------------------------------------------------------------------------------------------------------------------------------------------------------------------------------------------------------------------------------------------------------------------------------------------------------------------------------------------------------------------------------------------------------------------------------------------------------------------------------------------------------------------------------------------------------------------------------------------------------------|
| Suliman et al. 2015[150] | <p>FVC% &lt; 80%: FNR = 62.5%<br/> FPR = 7.9%<br/> Se = 37.5% (0.3-0.5)<br/> Sp = 92% (0.8-1.0)<br/> LR+ = 4.7 (1.5-4.7)<br/> LR- = 0.7 (0.5-0.8)</p> <p>DLCOCorr &lt;70% or FVC% &lt; 80%: FNR = 41.0%<br/> FPR = 34.3%<br/> Se = 59.0% (0.4-0.7)<br/> Sp = 65.8% (0.5-0.7)<br/> LR+ = 1.7 (1.0-2.8)<br/> LR- = 0.6 (0.4-0.9)</p> <p>FVC% or TLC% &lt; 80%: FNR = 55.0%<br/> FPR = 13.2%<br/> Se = 45.0% (0.3-0.5)<br/> Sp = 86.0% (0.7-0.9)<br/> LR+ = 3.4 (1.4-8.1)<br/> LR- = 0.6 (0.4-0.8)</p> <p>DLCOCorr% &lt; 70% or FVC% or TLC% &lt; 80%:<br/> FNR = 37.0%<br/> FPR = 37.0%<br/> Se = 62.0% (0.5-0.7)<br/> Sp = 63.0% (0.4-0.7)<br/> LR+ = 1.7 (1.0-2.6)<br/> LR- = 0.6 (0.4-0.8)</p> |
|--------------------------|-------------------------------------------------------------------------------------------------------------------------------------------------------------------------------------------------------------------------------------------------------------------------------------------------------------------------------------------------------------------------------------------------------------------------------------------------------------------------------------------------------------------------------------------------------------------------------------------------------------------------------------------------------------------------------------------------|

**HRCT: Computer-Aided Method Pulmonary Fibrosis Fraction (%)**

|                          |                                                                                                                                  |
|--------------------------|----------------------------------------------------------------------------------------------------------------------------------|
| Salaffi et al. 2015[211] | <p>DLCO%: r = -0.490 (p &lt; 0.0001)<br/> FEV<sub>1</sub>%: r = -0.675 (p &lt; 0.0001)<br/> FVC%: r = -0.653 (p &lt; 0.0001)</p> |
| Salaffi et al. 2016[214] | <p>DLCO%: r = -0.556 (p &lt; 0.0001)<br/> FVC%: r = -0.670 (p &lt; 0.0001)</p>                                                   |

**HRCT: Extent of Lung Involvement – Scoring Not Reported**

|                                         |                                                                                                          |
|-----------------------------------------|----------------------------------------------------------------------------------------------------------|
| Ananyeva et al. 2010[188]<br>(Abstract) | <p>DLCO%: r = -0.42 (p = 0.00)<br/> FVC%: r = -0.31 (p = 0.0002)</p>                                     |
| Peng et al. 2010[189]<br>(Abstract)     | <p>DLCO%: r = -0.496 (p = 0.000)<br/> FVC%: r = -0.324 (p = 0.009)<br/> TLC%: r = -0.465 (p = 0.000)</p> |
| Parra et al. 2011[193]<br>(Abstract)    | <p>DLCO%: r = -0.601 (p = 0.01)</p>                                                                      |

Abbreviations: % = Percent Predicted; AUC = Area Under the Curve; CI = Confidence Interval; DLCO = Diffusing Capacity for Carbon Monoxide; DLCO/VA = Diffusing Capacity for Carbon Monoxide Corrected for Alveolar Volume; DLCOCorr = Diffusing Capacity for Carbon Monoxide Corrected for Haemoglobin; DLCOCorr/VA = Diffusing Capacity for Carbon Monoxide Corrected for Alveolar Volume and Haemoglobin; FRC = Functional Residual Capacity; FVC = Forced Vital Capacity; FEV<sub>1</sub> = Forced Expiratory Volume in the 1<sup>st</sup> Second of Forced Exhalation; FNR = False Negative Rate; FPR = False Positive Rate; HRCT = High-Resolution Computed Tomography; ILD = Interstitial Lung Disease; LR- = Negative Likelihood Ratio; LR+ = Positive Likelihood Ratio; NPV = Negative Predictive Value; NS = Not Significant; p = p-value; PPV = Positive Predictive Value; R<sup>2</sup> = Coefficient of Determination; RV = Residual Volume; Se = Sensitivity; Sp = Specificity; TLC = Total Lung Capacity; VC = Vital Capacity



|                                                      |                                                                                                                                                                                                                         |
|------------------------------------------------------|-------------------------------------------------------------------------------------------------------------------------------------------------------------------------------------------------------------------------|
| Mantero et al. 2012[195]<br>(Abstract)               | FVC%: $r = -0.77$ ( $p < 0.0001$ )                                                                                                                                                                                      |
| Ghandour et al. 2015[208]<br>(Abstract)              | FEV <sub>1</sub> /FVC%: $r = 0.593$ ( $p = 0.000$ )<br>FVC%: $r = 0.373$ ( $p = 0.018$ )                                                                                                                                |
| <b>HRCT: Fibrosis Index (0-48)</b>                   |                                                                                                                                                                                                                         |
| Ooi et al. 2003[180]                                 | FVC%: $r = -0.31$ ( $p = 0.05$ )<br>TLC%: $r = -0.38$ ( $p = 0.02$ )                                                                                                                                                    |
| <b>HRCT: Fibrosis Ratio</b>                          |                                                                                                                                                                                                                         |
| Ariani et al. 2015[206]                              | DLCO%: $r = -0.10$ (NS)<br>DLCO/VA%: $r = 0.06$ (NS)<br>FVC%: $r = -0.18$ ( $p = 0.0038$ )<br>TLC%: $r = -0.04$ (NS)                                                                                                    |
| <b>HRCT: Global Fibrosis Score (0-4)</b>             |                                                                                                                                                                                                                         |
| Goldin et al. 2008[184]                              | DLCO%: $r = -0.44$ ( $p = 0.0001$ )<br>FEV <sub>1</sub> %: $r = -0.05$ ( $p = 0.54$ )<br>FEV <sub>1</sub> /FVC%: $r = 0.31$ ( $p = 0.0002$ )<br>FVC%: $r = -0.22$ ( $p = 0.007$ )<br>TLC%: $r = -0.36$ ( $p = 0.0001$ ) |
| Goldin et al. 2009[186]                              | <b>Longitudinal Validation:</b><br>DLCO%: Kendall $\tau = 0.199$ ( $p = 0.053$ )<br>FVC%: Kendall $\tau = 0.21$ ( $p = 0.041$ )<br>TLC%: Kendall $\tau = 0.22$ ( $p = 0.035$ )                                          |
| Assayag et al. 2012[194]<br>(Abstract)               | DLCO%: $r = -0.587$ ( $p < 0.005$ )<br>FVC%: $r = -0.535$ ( $p < 0.005$ )                                                                                                                                               |
| <b>HRCT: Global Ground-Glass Opacity Score (0-4)</b> |                                                                                                                                                                                                                         |
| Goldin et al. 2008[184]                              | DLCO%: $r = 0.05$ ( $p = 0.52$ )<br>FEV <sub>1</sub> %: $r = 0.19$ ( $p = 0.02$ )<br>FEV <sub>1</sub> /FVC%: $r = 0.02$ ( $p = 0.76$ )<br>FVC%: $r = 0.14$ ( $p = 0.08$ )<br>TLC%: $r = -0.03$ ( $p = 0.7$ )            |
| Assayag et al. 2012[194]<br>(Abstract)               | DLCO%: $r = -0.521$ ( $p < 0.005$ )<br>FVC%: $r = -0.450$ ( $p < 0.005$ )                                                                                                                                               |
| <b>HRCT: Global Honeycombing Score (0-4)</b>         |                                                                                                                                                                                                                         |
| Goldin et al. 2008[184]                              | DLCO%: $r = -0.25$ ( $p = 0.002$ )<br>FEV <sub>1</sub> %: $r = -0.07$ ( $p = 0.41$ )<br>FEV <sub>1</sub> /FVC%: $r = -0.005$ ( $p = 0.59$ )<br>FVC%: $r = -0.04$ ( $p = 0.61$ )<br>TLC%: $r = -0.19$ ( $p = 0.02$ )     |

Abbreviations: % = Percent Predicted; AUC = Area Under the Curve; CI = Confidence Interval; DLCO = Diffusing Capacity for Carbon Monoxide; DLCO/VA = Diffusing Capacity for Carbon Monoxide Corrected for Alveolar Volume; DLCOcorr = Diffusing Capacity for Carbon Monoxide Corrected for Haemoglobin; DLCOcorr/VA = Diffusing Capacity for Carbon Monoxide Corrected for Alveolar Volume and Haemoglobin; FRC = Functional Residual Capacity; FVC = Forced Vital Capacity; FEV<sub>1</sub> = Forced Expiratory Volume in the 1<sup>st</sup> Second of Forced Exhalation; FNR = False Negative Rate; FPR = False Positive Rate; HRCT = High-Resolution Computed Tomography; ILD = Interstitial Lung Disease; LR- = Negative Likelihood Ratio; LR+ = Positive Likelihood Ratio; NPV = Negative Predictive Value; NS = Not Significant;  $p$  =  $p$ -value; PPV = Positive Predictive Value;  $R^2$  = Coefficient of Determination; RV = Residual Volume; Se = Sensitivity; Sp = Specificity; TLC = Total Lung Capacity; VC = Vital Capacity

|                                                                          |                                                                                                                                                                                     |
|--------------------------------------------------------------------------|-------------------------------------------------------------------------------------------------------------------------------------------------------------------------------------|
| Assayag et al. 2012[194]<br>(Abstract)                                   | DLCO%: r = -0.398 (p < 0.005)<br>FVC%: r = -0.458 (p < 0.005)                                                                                                                       |
| <b>HRCT: Global Severity Score (0-12)</b>                                |                                                                                                                                                                                     |
| Assayag et al. 2012[194]<br>(Abstract)                                   | DLCO%: r = -0.617 (p < 0.0001)<br>FVC%: r = -0.580 (p < 0.0001)                                                                                                                     |
| Guarnieri et al. 2015[209]                                               | DLCO%: r = 0.45 (p = 0.01)                                                                                                                                                          |
| <b>HRCT: Inflammatory Index (0-48)</b>                                   |                                                                                                                                                                                     |
| Ooi et al. 2003[180]                                                     | DLCO%: r = -0.43 (p = 0.008)                                                                                                                                                        |
| <b>HRCT: Inspiratory Volume/Body Surface Area</b>                        |                                                                                                                                                                                     |
| Orlandi et al. 2006[181]                                                 | DLCO%: r = 0.56 (p < 0.01)<br>TLC%: r = 0.69 (p < 0.01)                                                                                                                             |
| <b>HRCT: Kazerooni Alveolar Score (0-5)</b>                              |                                                                                                                                                                                     |
| De Santis et al. 2005[36]                                                | DLCO%: r = -0.53 (p < 0.0001)<br>FVC%: r = -0.51 (p < 0.0001)                                                                                                                       |
| <b>HRCT: Kazerooni Interstitial Score (0-5)</b>                          |                                                                                                                                                                                     |
| De Santis et al. 2005[36]                                                | DLCO%: r = -0.35 (p = 0.0006)<br>FVC%: r = -0.32 (p = 0.0016)                                                                                                                       |
| <b>HRCT: Left Percentage of Lower Lobe Volume</b>                        |                                                                                                                                                                                     |
| Cetincakm et al. 2016[213]                                               | DLCOccorr%: r = 0.076 (p = 0.750)<br>FEV <sub>1</sub> /FVC%: r = -0.037 (p = 0.873)<br>FVC%: r = 0.579 (p = 0.006)                                                                  |
| <b>HRCT: Low-Dose Volumetric Kurtosis</b>                                |                                                                                                                                                                                     |
| Orlandi et al. 2006[181]                                                 | DLCO%: r = 0.72 (p < 0.01)<br>TLC%: r = 0.75 (p < 0.01)                                                                                                                             |
| <b>HRCT: Low-Dose Volumetric Mean Lung Attenuation</b>                   |                                                                                                                                                                                     |
| Orlandi et al. 2006[181]                                                 | DLCO%: r = -0.68 (p < 0.01)<br>TLC%: r = -0.74 (p < 0.01)                                                                                                                           |
| <b>HRCT: Low-Dose Volumetric Total Lung Skewness</b>                     |                                                                                                                                                                                     |
| Orlandi et al. 2006[181]                                                 | DLCO%: r = 0.72 (p < 0.01)<br>TLC%: r = 0.71 (p < 0.01)                                                                                                                             |
| <b>HRCT: Maximum Fibrosis Score in Zone of Maximal Involvement (0-4)</b> |                                                                                                                                                                                     |
| Khanna et al. 2015[137]                                                  | <u>Placebo Group:</u><br>DLCO%: r = -0.46 (p = 0.001)<br>FVC%: r = -0.21 (p = 0.15)<br><u>Cyclophosphamide Group:</u><br>DLCO%: r = -0.44 (p = 0.003)<br>FVC%: r = -0.16 (p = 0.29) |
| <b>HRCT: Mean Lung Density</b>                                           |                                                                                                                                                                                     |

Abbreviations: % = Percent Predicted; AUC = Area Under the Curve; CI = Confidence Interval; DLCO = Diffusing Capacity for Carbon Monoxide; DLCO/VA = Diffusing Capacity for Carbon Monoxide Corrected for Alveolar Volume; DLCOccorr = Diffusing Capacity for Carbon Monoxide Corrected for Haemoglobin; DLCOccorr/VA = Diffusing Capacity for Carbon Monoxide Corrected for Alveolar Volume and Haemoglobin; FRC = Functional Residual Capacity; FVC = Forced Vital Capacity; FEV<sub>1</sub> = Forced Expiratory Volume in the 1<sup>st</sup> Second of Forced Exhalation; FNR = False Negative Rate; FPR = False Positive Rate; HRCT = High-Resolution Computed Tomography; ILD = Interstitial Lung Disease; LR- = Negative Likelihood Ratio; LR+ = Positive Likelihood Ratio; NPV = Negative Predictive Value; NS = Not Significant; p = p-value; PPV = Positive Predictive Value; R<sup>2</sup> = Coefficient of Determination; RV = Residual Volume; Se = Sensitivity; Sp = Specificity; TLC = Total Lung Capacity; VC = Vital Capacity

|                                                       |                                                                                                                                                                                                                                                                            |
|-------------------------------------------------------|----------------------------------------------------------------------------------------------------------------------------------------------------------------------------------------------------------------------------------------------------------------------------|
| Kloth et al. 2016[158]                                | <b>Longitudinal Validation:</b><br>FEV <sub>1</sub> : r = 0.733 (p = 0.016)                                                                                                                                                                                                |
| <b>HRCT: Modified Schurawitzki Total Score (0-18)</b> |                                                                                                                                                                                                                                                                            |
| Colaci et al. 2014[205]                               | DLCOccorr/VA%: r = -0.124 (NS)<br>TLC%: r = -0.206 (p = 0.033)<br>VC%: r = -0.310 (p < 0.001)                                                                                                                                                                              |
| <b>HRCT: Modified Warrick Total Score (0-115)</b>     |                                                                                                                                                                                                                                                                            |
| Gatta et al. 2013[201]                                | DLCO%: r = -0.741 (p = 2.02E-08)<br>DLCO/VA%: r = -0.687 (p = 0.0000005)<br>FVC%: r = -0.509 (p = 0.000575)<br>TLC%: r = -0.654 (p = 0.00000264)                                                                                                                           |
| <b>HRCT: Nearest 5% - Ground-Glass Opacity</b>        |                                                                                                                                                                                                                                                                            |
| Kim et al. 2001[177]                                  | <b>Longitudinal Validation:</b><br>DLCO%: Kendall $\tau$ = 0.57 (NS)<br>FEV <sub>1</sub> Absolute: Kendall $\tau$ = -0.221 (NS)<br>FEV <sub>1</sub> /FVC%: Kendall $\tau$ = -0.134 (NS)<br>FVC Absolute: Kendall $\tau$ = -0.125 (NS)                                      |
| <b>HRCT: Nearest 5% - Honeycombing</b>                |                                                                                                                                                                                                                                                                            |
| Kim et al. 2001[177]                                  | <b>Longitudinal Validation:</b><br>DLCO%: Kendall $\tau$ = -0.411 (p = 0.049)<br>FEV <sub>1</sub> Absolute: Kendall $\tau$ = -0.295 (p > 0.05)<br>FEV <sub>1</sub> /FVC%: Kendall $\tau$ = -0.276 or -0.020 (p > 0.05)<br>FVC Absolute: Kendall $\tau$ = -0.272 (p > 0.05) |
| <b>HRCT: Nearest 5% - Irregular Linear Opacity</b>    |                                                                                                                                                                                                                                                                            |
| Kim et al. 2001[177]                                  | <b>Longitudinal Validation:</b><br>DLCO%: Kendall $\tau$ = -0.172 (NS)<br>FEV <sub>1</sub> Absolute: Kendall $\tau$ = 0.0 (NS)<br>FEV <sub>1</sub> /FVC%: Kendall $\tau$ = 0.256 (NS)<br>FVC Absolute: Kendall $\tau$ = 0.20 (NS)                                          |
| <b>HRCT: Nearest 5% – Overall Lung Involvement</b>    |                                                                                                                                                                                                                                                                            |

Abbreviations: % = Percent Predicted; AUC = Area Under the Curve; CI = Confidence Interval; DLCO = Diffusing Capacity for Carbon Monoxide; DLCO/VA = Diffusing Capacity for Carbon Monoxide Corrected for Alveolar Volume; DLCOcorr = Diffusing Capacity for Carbon Monoxide Corrected for Haemoglobin; DLCOcorr/VA = Diffusing Capacity for Carbon Monoxide Corrected for Alveolar Volume and Haemoglobin; FRC = Functional Residual Capacity; FVC = Forced Vital Capacity; FEV<sub>1</sub> = Forced Expiratory Volume in the 1<sup>st</sup> Second of Forced Exhalation; FNR = False Negative Rate; FPR = False Positive Rate; HRCT = High-Resolution Computed Tomography; ILD = Interstitial Lung Disease; LR- = Negative Likelihood Ratio; LR+ = Positive Likelihood Ratio; NPV = Negative Predictive Value; NS = Not Significant; p = p-value; PPV = Positive Predictive Value; R<sup>2</sup> = Coefficient of Determination; RV = Residual Volume; Se = Sensitivity; Sp = Specificity; TLC = Total Lung Capacity; VC = Vital Capacity

|                          |                                                                                                                                                                                                                                                                                                                                                                                                                                                                                                                                                                                                                                                                                                                                                                                                          |
|--------------------------|----------------------------------------------------------------------------------------------------------------------------------------------------------------------------------------------------------------------------------------------------------------------------------------------------------------------------------------------------------------------------------------------------------------------------------------------------------------------------------------------------------------------------------------------------------------------------------------------------------------------------------------------------------------------------------------------------------------------------------------------------------------------------------------------------------|
| Wells et al. 1997[174]   | <p><b>All Patients:</b><br/> DLCO%: <math>r = -0.70</math> (<math>p &lt; 0.0005</math>)<br/> DLCO/VA%: <math>r = -0.38</math> (<math>p &lt; 0.003</math>)<br/> FEV<sub>1</sub>%: <math>r = -0.43</math> (<math>p &lt; 0.001</math>)<br/> FVC%: <math>r = -0.46</math> (<math>p &lt; 0.0005</math>)<br/> TLC%: <math>r = -0.51</math> (<math>p &lt; 0.0005</math>)</p> <p><b>Patients Undergoing Maximal Exercise Tests:</b><br/> DLCO%: <math>R^2 = 0.52</math><br/> DLCO%: <math>r = -0.69</math> (<math>p &lt; 0.0005</math>)<br/> DLCO/VA%: <math>r = -0.33</math> (<math>p &lt; 0.02</math>)<br/> FEV<sub>1</sub>%: <math>r = -0.41</math> (<math>p = 0.003</math>)<br/> FVC%: <math>r = -0.43</math> (<math>p &lt; 0.002</math>)<br/> TLC%: <math>r = -0.51</math> (<math>p &lt; 0.0005</math>)</p> |
| Wells et al. 1997[175]   | <p><b>Patients with Predominant Ground-Glass Attenuation (HRCT Grade 1):</b><br/> DLCO%: <math>r = -0.68</math></p> <p><b>Patients with Mixed Appearances (HRCT Grade 2):</b><br/> DLCO%: <math>r = -0.78</math></p> <p><b>Patients with Predominance of a Reticular Pattern (HRCT Grade 3):</b><br/> DLCO%: <math>r = -0.76</math></p> <p><b>Patients with Reversible Disease on Serial HRCT:</b><br/> DLCO%: <math>r = -0.79</math></p> <p><b>Patients with No Regression of Disease at Follow-Up HRCT:</b><br/> DLCO%: <math>r = -0.72</math></p>                                                                                                                                                                                                                                                     |
| Kim et al. 2001[177]     | <p><b>Longitudinal Validation:</b><br/> DLCO%: Kendall <math>\tau = -0.124</math> (NS)<br/> FEV<sub>1</sub> Absolute: Kendall <math>\tau = -0.249</math> (NS)<br/> FEV<sub>1</sub>/FVC%: Kendall <math>\tau = -0.168</math> (NS)<br/> FVC Absolute: Kendall <math>\tau = -0.172</math> (NS)</p>                                                                                                                                                                                                                                                                                                                                                                                                                                                                                                          |
| Celeste et al. 2013[100] | <p>DLCO%: <math>r = -0.52</math> (<math>p &lt; 0.0001</math>) (95% CI: -0.64, -0.38)<br/> FVC%: <math>r = -0.456</math> (<math>p &lt; 0.0001</math>) (95% CI: -0.599, -0.29)</p>                                                                                                                                                                                                                                                                                                                                                                                                                                                                                                                                                                                                                         |
| Khanna et al. 2015[137]  | <p><b>Placebo Group:</b><br/> DLCO%: <math>r = -0.48</math> (<math>p = 0.001</math>)<br/> FVC%: <math>r = -0.05</math> (<math>p = 0.75</math>)</p> <p><b>Cyclophosphamide Group:</b><br/> DLCO%: <math>r = -0.51</math> (<math>p = 0.001</math>)<br/> FVC%: <math>r = -0.25</math> (<math>p = 0.09</math>)</p>                                                                                                                                                                                                                                                                                                                                                                                                                                                                                           |

Abbreviations: % = Percent Predicted; AUC = Area Under the Curve; CI = Confidence Interval; DLCO = Diffusing Capacity for Carbon Monoxide; DLCO/VA = Diffusing Capacity for Carbon Monoxide Corrected for Alveolar Volume; DLCOcorr = Diffusing Capacity for Carbon Monoxide Corrected for Haemoglobin; DLCOcorr/VA = Diffusing Capacity for Carbon Monoxide Corrected for Alveolar Volume and Haemoglobin; FRC = Functional Residual Capacity; FVC = Forced Vital Capacity; FEV<sub>1</sub> = Forced Expiratory Volume in the 1<sup>st</sup> Second of Forced Exhalation; FNR = False Negative Rate; FPR = False Positive Rate; HRCT = High-Resolution Computed Tomography; ILD = Interstitial Lung Disease; LR- = Negative Likelihood Ratio; LR+ = Positive Likelihood Ratio; NPV = Negative Predictive Value; NS = Not Significant;  $p$  =  $p$ -value; PPV = Positive Predictive Value;  $R^2$  = Coefficient of Determination; RV = Residual Volume; Se = Sensitivity; Sp = Specificity; TLC = Total Lung Capacity; VC = Vital Capacity

|                                                                                |                                                                                                                                                |
|--------------------------------------------------------------------------------|------------------------------------------------------------------------------------------------------------------------------------------------|
| Antoniou et al. 2016[212]                                                      | DLCO%: r = -0.56<br>FEV <sub>1</sub> %: r = -0.28<br>FVC%: r = -0.35<br>FVC/DLCO Absolute: r = 0.36 (p < 0.0005)                               |
| <b>HRCT: Parenchymal Kurtosis</b>                                              |                                                                                                                                                |
| Ariani et al. 2015[206]                                                        | DLCO%: r = 0.42 (p < 0.0001)<br>DLCO/VA%: r = 0.13 (NS)<br>FVC%: r = 0.51 (p < 0.0001)<br>TLC%: r = 0.50 (p < 0.0001)                          |
| <b>HRCT: Parenchymal Mean Lung Attenuation</b>                                 |                                                                                                                                                |
| Ariani et al. 2015[206]                                                        | DLCO%: r = -0.41 (p < 0.0001)<br>DLCO/VA%: r = -0.09 (NS)<br>FVC%: r = -0.52 (p < 0.0001)<br>TLC%: r = -0.52 (p < 0.0001)                      |
| <b>HRCT: Parenchymal Skewness</b>                                              |                                                                                                                                                |
| Ariani et al. 2015[206]                                                        | DLCO%: r = 0.41 (p < 0.0001)<br>DLCO/VA%: r = 0.13 (NS)<br>FVC%: r = 0.49 (p < 0.0001)<br>TLC%: r = 0.46 (p < 0.0001)                          |
| <b>HRCT: Parenchymal Standard Deviation</b>                                    |                                                                                                                                                |
| Ariani et al. 2015[206]                                                        | DLCO%: r = -0.33 (p < 0.0001)<br>DLCO/VA%: r = -0.12 (NS)<br>FVC%: r = -0.4 (p < 0.0001)<br>TLC%: r = -0.43 (p < 0.0001)                       |
| <b>HRCT: Quantitative Ground-Glass Opacity in Whole Lung</b>                   |                                                                                                                                                |
| Tashkin et al. 2016[215]                                                       | DLCOcorr%: r = -0.28 (p < 0.0001)<br>FEV <sub>1</sub> /FVC%: r = 0.15 (p < 0.01)<br>FVC%: r = -0.10 (p ≥ 0.01)<br>TLC%: r = -0.21 (p < 0.0001) |
| <b>HRCT: Quantitative Ground-Glass Opacity in Zone of Maximal Involvement</b>  |                                                                                                                                                |
| Tashkin et al. 2016[215]                                                       | DLCOcorr%: r = 0.03 (p ≥ 0.01)<br>FEV <sub>1</sub> /FVC%: r = -0.02 (p ≥ 0.01)<br>FVC%: r = -0.11 (p ≥ 0.01)<br>TLC%: r = 0.08 (p ≥ 0.01)      |
| <b>HRCT: Quantitative Percentage with Fibrosis in Highest Zone at Baseline</b> |                                                                                                                                                |
| Kim et al. 2011[191]                                                           | <b>Longitudinal Validation:</b><br>FVC%: r = -0.40 (p = 0.0003)<br>TLC%: r = -0.18 (p = 0.12)                                                  |
| <b>HRCT: Quantitative Percentage with Fibrosis in Whole Lung</b>               |                                                                                                                                                |

Abbreviations: % = Percent Predicted; AUC = Area Under the Curve; CI = Confidence Interval; DLCO = Diffusing Capacity for Carbon Monoxide; DLCO/VA = Diffusing Capacity for Carbon Monoxide Corrected for Alveolar Volume; DLCOcorr = Diffusing Capacity for Carbon Monoxide Corrected for Haemoglobin; DLCOcorr/VA = Diffusing Capacity for Carbon Monoxide Corrected for Alveolar Volume and Haemoglobin; FRC = Functional Residual Capacity; FVC = Forced Vital Capacity; FEV<sub>1</sub> = Forced Expiratory Volume in the 1<sup>st</sup> Second of Forced Exhalation; FNR = False Negative Rate; FPR = False Positive Rate; HRCT = High-Resolution Computed Tomography; ILD = Interstitial Lung Disease; LR- = Negative Likelihood Ratio; LR+ = Positive Likelihood Ratio; NPV = Negative Predictive Value; NS = Not Significant; p = p-value; PPV = Positive Predictive Value; R<sup>2</sup> = Coefficient of Determination; RV = Residual Volume; Se = Sensitivity; Sp = Specificity; TLC = Total Lung Capacity; VC = Vital Capacity

|                                                                                   |                                                                                                                                                                                                                                                                                                                                              |
|-----------------------------------------------------------------------------------|----------------------------------------------------------------------------------------------------------------------------------------------------------------------------------------------------------------------------------------------------------------------------------------------------------------------------------------------|
| Kim et al. 2011[190]<br>(Abstract)                                                | <u>Evaluation Set:</u><br>DLCO%: r = -0.35 (p < 0.0001)<br>FEV <sub>1</sub> %: r = -0.23 (p < 0.0001)<br>FVC%: r = -0.31 (p < 0.0001)<br><u>New Cohort:</u><br>DLCO%: r = -0.35 (p < 0.0001)<br>FEV <sub>1</sub> %: r = -0.45 (p < 0.0001)<br>FVC%: r = -0.53 (p < 0.0001)                                                                   |
| Kim et al. 2011[191]                                                              | <b><u>Longitudinal Validation:</u></b><br>FVC%: r = -0.33 (p = 0.003)<br>TLC%: r = -0.16 (p = 0.17)                                                                                                                                                                                                                                          |
| Khanna et al. 2015[137]                                                           | <u>Placebo Group:</u><br>DLCO%: r = -0.22 (p = 0.13)<br>FVC%: r = -0.17 (p = 0.26)<br><u>Cyclophosphamide Group:</u><br>DLCO%: r = -0.20 (p = 0.20)<br>FVC%: r = -0.25 (p = 0.11)                                                                                                                                                            |
| Kim et al. 2015[210]<br>(Abstract)                                                | DLCO%: r = -0.50<br>FVC%: r = -0.49<br><b><u>Longitudinal Validation:</u></b><br>FVC%: r = -0.39 (p = 0.0007)                                                                                                                                                                                                                                |
| Tashkin et al. 2016[215]                                                          | DLCOcorr%: r = -0.42 (p < 0.0001)<br>FEV <sub>1</sub> /FVC%: r = 0.15 (p ≥ 0.01)<br>FVC%: r = -0.27 (p < 0.0001)<br>TLC%: r = -0.37 (p < 0.0001)<br><u>Scleroderma Lung Study I (SLS I):</u><br>DLCOcorr%: R <sup>2</sup> = 0.46 (p < 0.0001)<br><u>Scleroderma Lung Study II (SLS II):</u><br>DLCOcorr%: R <sup>2</sup> = 0.39 (p < 0.0001) |
| <b>HRCT: Quantitative Percentage with Fibrosis in Zone of Maximal Involvement</b> |                                                                                                                                                                                                                                                                                                                                              |
| Khanna et al. 2015[137]                                                           | <u>Placebo Group:</u><br>DLCO%: r = -0.43 (p = 0.002)<br>FVC%: r = -0.45 (p = 0.002)<br><u>Cyclophosphamide Group:</u><br>DLCO%: r = -0.41 (p = 0.005)<br>FVC%: r = -0.39 (p = 0.02)                                                                                                                                                         |

Abbreviations: % = Percent Predicted; AUC = Area Under the Curve; CI = Confidence Interval; DLCO = Diffusing Capacity for Carbon Monoxide; DLCO/VA = Diffusing Capacity for Carbon Monoxide Corrected for Alveolar Volume; DLCOcorr = Diffusing Capacity for Carbon Monoxide Corrected for Haemoglobin; DLCOcorr/VA = Diffusing Capacity for Carbon Monoxide Corrected for Alveolar Volume and Haemoglobin; FRC = Functional Residual Capacity; FVC = Forced Vital Capacity; FEV<sub>1</sub> = Forced Expiratory Volume in the 1<sup>st</sup> Second of Forced Exhalation; FNR = False Negative Rate; FPR = False Positive Rate; HRCT = High-Resolution Computed Tomography; ILD = Interstitial Lung Disease; LR- = Negative Likelihood Ratio; LR+ = Positive Likelihood Ratio; NPV = Negative Predictive Value; NS = Not Significant; p = p-value; PPV = Positive Predictive Value; R<sup>2</sup> = Coefficient of Determination; RV = Residual Volume; Se = Sensitivity; Sp = Specificity; TLC = Total Lung Capacity; VC = Vital Capacity

|                                                                              |                                                                                                                                                                                                                                                                                                                                                                  |
|------------------------------------------------------------------------------|------------------------------------------------------------------------------------------------------------------------------------------------------------------------------------------------------------------------------------------------------------------------------------------------------------------------------------------------------------------|
| Tashkin et al. 2016[215]                                                     | DLCOccorr%: $r = -0.49$ ( $p < 0.0001$ )<br>FEV <sub>1</sub> /FVC%: $r = 0.14$ ( $p \geq 0.01$ )<br>FVC%: $r = -0.34$ ( $p < 0.0001$ )<br>TLC%: $r = -0.44$ ( $p < 0.0001$ )<br><u>Scleroderma Lung Study I (SLS I):</u><br>DLCOccorr%: $R^2 = 0.48$ ( $p < 0.0001$ )<br><u>Scleroderma Lung Study II (SLS II):</u><br>DLCOccorr%: $R^2 = 0.44$ ( $p < 0.0001$ ) |
| <b>HRCT: Quantitative Total Extent of ILD in Whole Lung</b>                  |                                                                                                                                                                                                                                                                                                                                                                  |
| Khanna et al. 2015[137]                                                      | <u>Placebo Group:</u><br>DLCO%: $r = -0.35$ ( $p = 0.01$ )<br>FVC%: $r = -0.38$ ( $p = 0.008$ )<br><u>Cyclophosphamide Group:</u><br>DLCO%: $r = -0.07$ ( $p = 0.63$ )<br>FVC%: $r = -0.08$ ( $p = 0.61$ )                                                                                                                                                       |
| Tashkin et al. 2016[215]                                                     | DLCOccorr%: $r = -0.43$ ( $p < 0.0001$ )<br>FEV <sub>1</sub> /FVC%: $r = 0.20$ ( $p < 0.01$ )<br>FVC%: $r = -0.22$ ( $p < 0.0001$ )<br>TLC%: $r = -0.32$ ( $p < 0.0001$ )<br><u>Scleroderma Lung Study I (SLS I):</u><br>DLCOccorr%: $R^2 = 0.44$ ( $p < 0.0001$ )<br><u>Scleroderma Lung Study II (SLS II):</u><br>DLCOccorr%: $R^2 = 0.37$ ( $p < 0.0001$ )    |
| <b>HRCT: Quantitative Total Extent of ILD in Zone of Maximal Involvement</b> |                                                                                                                                                                                                                                                                                                                                                                  |
| Khanna et al. 2015[137]                                                      | <u>Placebo Group:</u><br>DLCO%: $r = -0.41$ ( $p = 0.005$ )<br>FVC%: $r = -0.27$ ( $p = 0.07$ )<br><u>Cyclophosphamide Group:</u><br>DLCO%: $r = -0.24$ ( $p = 0.12$ )<br>FVC%: $r = -0.19$ ( $p = 0.23$ )                                                                                                                                                       |
| Tashkin et al. 2016[215]                                                     | DLCOccorr%: $r = -0.44$ ( $p < 0.0001$ )<br>FEV <sub>1</sub> /FVC%: $r = 0.17$ ( $p \geq 0.01$ )<br>FVC%: $r = -0.32$ ( $p < 0.0001$ )<br>TLC%: $r = -0.47$ ( $p < 0.0001$ )<br><u>Scleroderma Lung Study I (SLS I):</u><br>DLCOccorr%: $R^2 = 0.55$ ( $p < 0.0001$ )<br><u>Scleroderma Lung Study II (SLS II):</u><br>DLCOccorr%: $R^2 = 0.44$ ( $p < 0.0001$ ) |
| <b>HRCT: Right Percentage of Lower Lobe Volume</b>                           |                                                                                                                                                                                                                                                                                                                                                                  |

Abbreviations: % = Percent Predicted; AUC = Area Under the Curve; CI = Confidence Interval; DLCO = Diffusing Capacity for Carbon Monoxide; DLCO/VA = Diffusing Capacity for Carbon Monoxide Corrected for Alveolar Volume; DLCOccorr = Diffusing Capacity for Carbon Monoxide Corrected for Haemoglobin; DLCOccorr/VA = Diffusing Capacity for Carbon Monoxide Corrected for Alveolar Volume and Haemoglobin; FRC = Functional Residual Capacity; FVC = Forced Vital Capacity; FEV<sub>1</sub> = Forced Expiratory Volume in the 1<sup>st</sup> Second of Forced Exhalation; FNR = False Negative Rate; FPR = False Positive Rate; HRCT = High-Resolution Computed Tomography; ILD = Interstitial Lung Disease; LR- = Negative Likelihood Ratio; LR+ = Positive Likelihood Ratio; NPV = Negative Predictive Value; NS = Not Significant;  $p$  =  $p$ -value; PPV = Positive Predictive Value;  $R^2$  = Coefficient of Determination; RV = Residual Volume; Se = Sensitivity; Sp = Specificity; TLC = Total Lung Capacity; VC = Vital Capacity

|                                                                          |                                                                                                                                                                |
|--------------------------------------------------------------------------|----------------------------------------------------------------------------------------------------------------------------------------------------------------|
| Cetincakm et al. 2016[213]                                               | DLCOccorr%: r = 0.115 (p = 0.628)<br>FEV <sub>1</sub> /FVC%: r = -0.041 (p = 0.860)<br>FVC%: r = 0.536 (p = 0.012)                                             |
| <b>HRCT: Scoring Not Reported</b>                                        |                                                                                                                                                                |
| Vonk et al. 2009[187]                                                    | TLC%: r = 0.527 (p < 0.01)                                                                                                                                     |
| <b>HRCT: Tomographic Index</b>                                           |                                                                                                                                                                |
| Zimmermann et al. 2012[200]<br>(Abstract)                                | DLCO: r = 0.31 (p = 0.04)<br>Final Expiratory Volume: r = 0.31 (p = 0.03)<br>FVC: r = 0.40 (p = 0.005)<br>RV: r = 0.33 (p = 0.02)<br>TLC: r = 0.55 (p < 0.001) |
| <b>HRCT: Total Extent of Fibrosis – Scoring Not Reported</b>             |                                                                                                                                                                |
| Zamora et al. 2013[204]<br>(Abstract)                                    | DLCO%: r = -0.37 (p < 0.0001)<br>FVC%: r = -0.44 (p < 0.0001)<br>TLC%: r = -0.41 (p < 0.0001)                                                                  |
| <b>HRCT: Total Extent of Ground-Glass Opacity – Scoring Not Reported</b> |                                                                                                                                                                |
| Zamora et al. 2013[204]<br>(Abstract)                                    | DLCO%: r = -0.10 (p = 0.11)<br>FVC%: r = -0.17 (p = 0.005)<br>TLC%: r = -0.066 (p = 0.34)                                                                      |
| <b>HRCT: Total Extent of Ground-Glass Opacity (0-24)</b>                 |                                                                                                                                                                |
| Wilsher et al. 2012[199]                                                 | DLCO%: r = -0.57 (p = 0.01)<br>FEV <sub>1</sub> %: r = -0.38 (p = 0.05)<br>VC%: r = -0.36 (p = 0.07)                                                           |
| <b>HRCT: Total Extent of Honeycombing – Scoring Not Reported</b>         |                                                                                                                                                                |
| Zamora et al. 2013[204]<br>(Abstract)                                    | DLCO%: r = -0.32 (p < 0.0001)<br>FVC%: r = -0.38 (p < 0.0001)<br>TLC%: r = -0.34 (p < 0.0001)                                                                  |
| <b>HRCT: Total Extent of Reticular Pattern (0-24)</b>                    |                                                                                                                                                                |
| Wilsher et al. 2012[199]                                                 | DLCO%: r = -0.53 (p = 0.01)<br>FEV <sub>1</sub> %: r = -0.19 (p = 0.33)<br>VC%: r = -0.13 (p = 0.51)                                                           |
| <b>HRCT: Total Lung Kurtosis</b>                                         |                                                                                                                                                                |
| Orlandi et al. 2006[181]                                                 | DLCO%: r = 0.75 (p < 0.01)<br>TLC%: r = 0.78 (p < 0.01)                                                                                                        |
| Camiciottoli et al. 2007[183]                                            | DLCO%: r = 0.58 (p < 0.0001)<br>FEV <sub>1</sub> %: r = 0.56 (p < 0.0001)<br>FRC%: r = 0.57 (p < 0.0001)<br>FVC%: r = 0.71 (p < 0.0001)                        |

Abbreviations: % = Percent Predicted; AUC = Area Under the Curve; CI = Confidence Interval; DLCO = Diffusing Capacity for Carbon Monoxide; DLCO/VA = Diffusing Capacity for Carbon Monoxide Corrected for Alveolar Volume; DLCOccorr = Diffusing Capacity for Carbon Monoxide Corrected for Haemoglobin; DLCOccorr/VA = Diffusing Capacity for Carbon Monoxide Corrected for Alveolar Volume and Haemoglobin; FRC = Functional Residual Capacity; FVC = Forced Vital Capacity; FEV<sub>1</sub> = Forced Expiratory Volume in the 1<sup>st</sup> Second of Forced Exhalation; FNR = False Negative Rate; FPR = False Positive Rate; HRCT = High-Resolution Computed Tomography; ILD = Interstitial Lung Disease; LR- = Negative Likelihood Ratio; LR+ = Positive Likelihood Ratio; NPV = Negative Predictive Value; NS = Not Significant; p = p-value; PPV = Positive Predictive Value; R<sup>2</sup> = Coefficient of Determination; RV = Residual Volume; Se = Sensitivity; Sp = Specificity; TLC = Total Lung Capacity; VC = Vital Capacity



|                                           |                                                                                                                           |
|-------------------------------------------|---------------------------------------------------------------------------------------------------------------------------|
| Nguyen-Kim et al. 2013[202]<br>(Abstract) | DLCO: r = 0.29 (p = 0.1)<br>FEV <sub>1</sub> : r = 0.45 (p = 0.01)<br>FVC: r = 0.39 (p = 0.03)<br>TLC: r = 0.29 (p = 0.1) |
| Ariani et al. 2015[206]                   | DLCO%: r = 0.38 (p < 0.0001)<br>DLCO/VA%: r = 0.07 (NS)<br>FVC%: r = 0.51 (p < 0.0001)<br>TLC%: r = 0.49 (p < 0.0001)     |
| Kim et al. 2015[210]<br>(Abstract)        | DLCO%: r = 0.45<br>FVC%: r = 0.42<br><b><u>Longitudinal Validation:</u></b><br>FVC%: r = 0.14 (p = 0.24)                  |

#### **HRCT: Total Lung Skewness**

|                                           |                                                                                                                                         |
|-------------------------------------------|-----------------------------------------------------------------------------------------------------------------------------------------|
| Orlandi et al. 2006[181]                  | DLCO%: r = 0.73 (p < 0.01)<br>TLC%: r = 0.77 (p < 0.01)                                                                                 |
| Camiciottoli et al. 2007[183]             | DLCO%: r = 0.62 (p < 0.0001)<br>FEV <sub>1</sub> %: r = 0.52 (p < 0.0005)<br>FRC%: r = 0.58 (p < 0.0001)<br>FVC%: r = 0.67 (p < 0.0001) |
| Nguyen-Kim et al. 2013[202]<br>(Abstract) | DLCO: r = 0.34 (p = 0.056)<br>FEV <sub>1</sub> : r = 0.38 (p = 0.03)<br>FVC: r = 0.47 (p = 0.006)<br>TLC: r = 0.34 (p = 0.056)          |
| Ariani et al. 2015[206]                   | DLCO%: r = 0.41 (p < 0.0001)<br>DLCO/VA%: r = 0.11 (NS)<br>FVC%: r = 0.52 (p < 0.0001)<br>TLC%: r = 0.51 (p < 0.0001)                   |

#### **HRCT: Total Lung Standard Deviation**

|                         |                                                                                                                  |
|-------------------------|------------------------------------------------------------------------------------------------------------------|
| Ariani et al. 2015[206] | DLCO%: r = -0.15 (p = 0.0226)<br>DLCO/VA%: r = 0.05 (NS)<br>FVC%: r = -0.23 (p = 0.0005)<br>TLC%: r = -0.11 (NS) |
|-------------------------|------------------------------------------------------------------------------------------------------------------|

#### **HRCT: Total Mean Lung Attenuation**

|                               |                                                                                                                                            |
|-------------------------------|--------------------------------------------------------------------------------------------------------------------------------------------|
| Orlandi et al. 2006[181]      | DLCO%: r = -0.66 (p < 0.01)<br>TLC%: r = -0.77 (p < 0.01)                                                                                  |
| Camiciottoli et al. 2007[183] | DLCO%: r = -0.55 (p < 0.0001)<br>FEV <sub>1</sub> %: r = -0.58 (p < 0.001)<br>FRC%: r = -0.59 (p < 0.0001)<br>FVC%: r = -0.66 (p < 0.0001) |

Abbreviations: % = Percent Predicted; AUC = Area Under the Curve; CI = Confidence Interval; DLCO = Diffusing Capacity for Carbon Monoxide; DLCO/VA = Diffusing Capacity for Carbon Monoxide Corrected for Alveolar Volume; DLCOcorr = Diffusing Capacity for Carbon Monoxide Corrected for Haemoglobin; DLCOcorr/VA = Diffusing Capacity for Carbon Monoxide Corrected for Alveolar Volume and Haemoglobin; FRC = Functional Residual Capacity; FVC = Forced Vital Capacity; FEV<sub>1</sub> = Forced Expiratory Volume in the 1<sup>st</sup> Second of Forced Exhalation; FNR = False Negative Rate; FPR = False Positive Rate; HRCT = High-Resolution Computed Tomography; ILD = Interstitial Lung Disease; LR- = Negative Likelihood Ratio; LR+ = Positive Likelihood Ratio; NPV = Negative Predictive Value; NS = Not Significant; p = p-value; PPV = Positive Predictive Value; R<sup>2</sup> = Coefficient of Determination; RV = Residual Volume; Se = Sensitivity; Sp = Specificity; TLC = Total Lung Capacity; VC = Vital Capacity

|                                                    |                                                                                                                                                 |
|----------------------------------------------------|-------------------------------------------------------------------------------------------------------------------------------------------------|
| Ariani et al. 2015[206]                            | DLCO%: r = -0.41 (p < 0.0001)<br>DLCO/VA%: r = -0.07 (NS)<br>FVC%: r = -0.54 (p < 0.0001)<br>TLC%: r = -0.52 (p < 0.0001)                       |
| <b>HRCT: Total Percentage of Lower Lobe Volume</b> |                                                                                                                                                 |
| Cetincakm et al. 2016[213]                         | DLCOccorr%: r = 0.121 (p = 0.61)<br>FEV <sub>1</sub> /FVC%: r = -0.062 (p = 0.792)<br>FVC%: r = 0.539 (p = 0.012)                               |
| <b>HRCT: Total Score (0-At Least 21)</b>           |                                                                                                                                                 |
| Shahin et al. 2001[178]                            | DLCO%: r = 0.64 (p < 0.01)                                                                                                                      |
| <b>HRCT: Total Score (0-24)</b>                    |                                                                                                                                                 |
| Mittal et al. 2012[196]<br>(Abstract)              | FVC%: r = -0.48                                                                                                                                 |
| <b>HRCT: Total Score (0-96)</b>                    |                                                                                                                                                 |
| Ooi et al. 2003[180]                               | DLCO%: r = -0.43 (p = 0.008)<br>FEV <sub>1</sub> %: r = -0.37 (p = 0.03)<br>FVC%: r = -0.43 (p = 0.008)<br>TLC%: r = -0.47 (p = 0.003 or 0.008) |
| <b>HRCT: Warrick Alveolitis Index (0-4)</b>        |                                                                                                                                                 |
| Bellia et al. 2009[185]                            | DLCO%: r = -0.46 (p = 0.01)<br>TLC%: r = -0.28 (p = 0.13)                                                                                       |
| <b>HRCT: Warrick Extent Score (1-3)</b>            |                                                                                                                                                 |
| Bellia et al. 2009[185]                            | DLCO%: r = -0.41 (p = 0.02)<br>FEV <sub>1</sub> %: r = -0.33 (p = 0.06)<br>TLC%: r = -0.37 (p = 0.04)                                           |
| <b>HRCT: Warrick Fibrosis Index (0-26)</b>         |                                                                                                                                                 |
| Bellia et al. 2009[185]                            | DLCO%: r = -0.38 (p = 0.04)<br>TLC%: r = -0.35 (p = 0.05)                                                                                       |
| <b>HRCT: Warrick Severity Score (1-5)</b>          |                                                                                                                                                 |
| Bellia et al. 2009[185]                            | DLCO%: r = -0.39 (p = 0.03)<br>FEV <sub>1</sub> %: r = -0.33 (p = 0.07)<br>TLC%: r = -0.34 (p = 0.06)                                           |
| <b>HRCT: Warrick Total Score (0-30)</b>            |                                                                                                                                                 |
| Diot et al. 1998[176]                              | DLCO%: r = -0.50 (p < 0.0002)<br>TLC%: r = -0.39 (p < 0.005)                                                                                    |
| Orlandi et al. 2006[181]                           | DLCO%: r = -0.45 (p < 0.01)<br>TLC%: r = -0.69 (p < 0.01)                                                                                       |

Abbreviations: % = Percent Predicted; AUC = Area Under the Curve; CI = Confidence Interval; DLCO = Diffusing Capacity for Carbon Monoxide; DLCO/VA = Diffusing Capacity for Carbon Monoxide Corrected for Alveolar Volume; DLCOccorr = Diffusing Capacity for Carbon Monoxide Corrected for Haemoglobin; DLCOccorr/VA = Diffusing Capacity for Carbon Monoxide Corrected for Alveolar Volume and Haemoglobin; FRC = Functional Residual Capacity; FVC = Forced Vital Capacity; FEV<sub>1</sub> = Forced Expiratory Volume in the 1<sup>st</sup> Second of Forced Exhalation; FNR = False Negative Rate; FPR = False Positive Rate; HRCT = High-Resolution Computed Tomography; ILD = Interstitial Lung Disease; LR- = Negative Likelihood Ratio; LR+ = Positive Likelihood Ratio; NPV = Negative Predictive Value; NS = Not Significant; p = p-value; PPV = Positive Predictive Value; R<sup>2</sup> = Coefficient of Determination; RV = Residual Volume; Se = Sensitivity; Sp = Specificity; TLC = Total Lung Capacity; VC = Vital Capacity

|                                                                             |                                                                                                                                                                                                                                                            |
|-----------------------------------------------------------------------------|------------------------------------------------------------------------------------------------------------------------------------------------------------------------------------------------------------------------------------------------------------|
| Beretta et al. 2007[182]                                                    | DLCOccorr%: $r = -0.18$ ( $p \geq 0.05$ )<br>FVC%: $r = -0.25$ ( $p \geq 0.05$ )<br>TLC%: $r = -0.42$ ( $p < 0.05$ )                                                                                                                                       |
| Camiciottoli et al. 2007[183]                                               | DLCO%: $r = -0.39$ ( $p < 0.01$ )<br>FEV <sub>1</sub> %: $r = -0.53$ ( $p < 0.005$ )<br>FRC%: $r = -0.51$ ( $p < 0.001$ )<br>FVC%: $r = -0.56$ ( $p < 0.0001$ )                                                                                            |
| Bellia et al. 2009[185]                                                     | DLCO%: $r = -0.43$ ( $p = 0.02$ )<br>FEV <sub>1</sub> %: $r = -0.36$ ( $p = 0.05$ )<br>TLC%: $r = -0.38$ ( $p = 0.04$ )                                                                                                                                    |
| Piorunek et al. 2013[203]                                                   | DLCO%: $r = -0.36$ ( $p < 0.05$ )                                                                                                                                                                                                                          |
| <b>HRCT: Wells Total Score (0-3)</b>                                        |                                                                                                                                                                                                                                                            |
| Gilson et al. 2010[64]                                                      | <b>Longitudinal Validation:</b><br>FVC%: Concordance $\kappa = 0.6$                                                                                                                                                                                        |
| <b>HRCT: Wells Total Score (0-4)</b>                                        |                                                                                                                                                                                                                                                            |
| Moghadam et al. 2011[192]                                                   | DLCO Absolute: $r = -0.513$ ( $p < 0.001$ )<br>DLCO%: $r = -0.657$ ( $p < 0.001$ )<br>FVC Absolute: $r = -0.429$ ( $p = 0.001$ )<br>FVC%: $r = -0.523$ ( $p < 0.001$ )<br>TLC Absolute: $r = -0.375$ ( $p = 0.005$ )<br>TLC%: $r = -0.549$ ( $p < 0.001$ ) |
| <b>Lung Biopsy: Four-Point Scoring System for Interstitial Fibrosis</b>     |                                                                                                                                                                                                                                                            |
| Harrison et al. 1991[173]                                                   | DLCO%: $r = -0.46$ ( $p < 0.01$ )                                                                                                                                                                                                                          |
| <b>Lung Biopsy: Four-Point Scoring System for Loss of Lung Architecture</b> |                                                                                                                                                                                                                                                            |
| Harrison et al. 1991[173]                                                   | DLCO%: $r = -0.4$ ( $p < 0.05$ )                                                                                                                                                                                                                           |

Abbreviations: % = Percent Predicted; AUC = Area Under the Curve; CI = Confidence Interval; DLCO = Diffusing Capacity for Carbon Monoxide; DLCO/VA = Diffusing Capacity for Carbon Monoxide Corrected for Alveolar Volume; DLCOccorr = Diffusing Capacity for Carbon Monoxide Corrected for Haemoglobin; DLCOccorr/VA = Diffusing Capacity for Carbon Monoxide Corrected for Alveolar Volume and Haemoglobin; FRC = Functional Residual Capacity; FVC = Forced Vital Capacity; FEV<sub>1</sub> = Forced Expiratory Volume in the 1<sup>st</sup> Second of Forced Exhalation; FNR = False Negative Rate; FPR = False Positive Rate; HRCT = High-Resolution Computed Tomography; ILD = Interstitial Lung Disease; LR- = Negative Likelihood Ratio; LR+ = Positive Likelihood Ratio; NPV = Negative Predictive Value; NS = Not Significant;  $p$  = p-value; PPV = Positive Predictive Value;  $R^2$  = Coefficient of Determination; RV = Residual Volume; Se = Sensitivity; Sp = Specificity; TLC = Total Lung Capacity; VC = Vital Capacity

**e-APPENDIX 7: Quality of the Five Validation Studies Evaluating the Performance of Pulmonary Function Tests (PFTs) Against High-Resolution Computed Tomography**

**(HRCT).** Study quality assessed using the Quality Assessment of Diagnostic Accuracy Studies (QUADAS-2) tool.

| Study                          | Risk of Bias      |              |                    |                 | Applicability Concerns |            |                     |
|--------------------------------|-------------------|--------------|--------------------|-----------------|------------------------|------------|---------------------|
|                                | Patient Selection | Index Test   | Reference Standard | Flow and Timing | Patient Selection      | Index Test | Reference Standards |
| Wells 1997[174]                | Low Risk          | Unclear Risk | Unclear Risk       | High Risk       | Unclear Risk           | Low Risk   | Low Risk            |
| Zamora 2013[204] (Abstract)    | Low Risk          | Unclear Risk | Unclear Risk       | High Risk       | Unclear Risk           | Low Risk   | Low Risk            |
| Bernstein 2015[207] (Abstract) | Low Risk          | Unclear Risk | Unclear Risk       | High Risk       | Low Risk               | Low Risk   | Low Risk            |
| Suliman 2015[150]              | Low Risk          | Unclear Risk | Low Risk           | Unclear Risk    | Unclear Risk           | Low Risk   | Low Risk            |
| Tashkin 2016[215]              | Low Risk          | Unclear Risk | Low Risk           | High Risk       | Unclear Risk           | Low Risk   | Low Risk            |

## REFERENCES

1. Schneider PD, Wise RA, Hochberg MC, Wigley FM. Serial pulmonary function in systemic sclerosis. *Am J Med* 1982; 73(3): 385-394.
2. Konig G, Luderschmidt C, Hammer C. Lung involvement in scleroderma. *Chest* 1984; 85(3): 318-324.
3. Peters-Golden M, Wise RA, Schneider P. Clinical and demographic predictors of loss of pulmonary function in systemic sclerosis. *Medicine (Baltimore)* 1984; 63(4): 221-231.
4. Steen VD, Owens GR, Redmond C, Rodnan GP, Medsger TA Jr. The effect of D-penicillamine on pulmonary findings in systemic sclerosis. *Arthritis Rheum* 1985; 28(8): 882-888.
5. De Clerck LS, Dequeker J, Francx L, Demedts M. D-Penicillamine therapy and interstitial lung disease in scleroderma. A long-term followup study. *Arthritis Rheum* 1987; 30(6): 643-650.
6. Greenwald GI, Tashkin DP, Gong H, Simmons M, Duann S, Furst DE, Clements P. Longitudinal changes in lung function and respiratory symptoms in progressive systemic sclerosis. Prospective study. *Am J Med* 1987; 83(1): 83-92.
7. McCarthy DS, Baragar FD, Dhingra S, Sigurdson M, Sutherland JB, Rigby M, Martin L. The lungs in systemic sclerosis (scleroderma): a review and new information. *Semin Arthritis Rheum* 1988; 17(4): 271-283.
8. Zarafonitis CJD, Dabich L, Devol EB, Skovronski JJ, Negri D, Yuan W. Retrospective studies in scleroderma: pulmonary findings and effect of potassium p-aminobenzoate on vital capacity. *Respiration* 1989; 56(1-2): 22-33.
9. Silver RM, Miller KS, Kinsella MB, Smith EA, Schabel SI. Evaluation and management of scleroderma lung disease using bronchoalveolar lavage. *Am J Med* 1990; 88(5): 470-476.
10. Abramson MJ, Barnett AJ, Littlejohn GO, Smith MM, Hall S. Lung function abnormalities and decline of spirometry in scleroderma: an overrated danger? *Postgrad Med J* 1991; 67(789): 632-637.
11. Wells AU, Hansell DM, Rubens MB, Cullinan P, Black CM, du Bois RM. The predictive value of appearances on thin-section computed tomography in fibrosing alveolitis. *Am Rev Respir Dis* 1993; 148(4): 1076-1082.
12. Wells AU, Hansell DM, Harrison NK, Lawrence R, Black CM, du Bois RM. Clearance of inhaled 99mTc-DTPA predicts the clinical course of fibrosing alveolitis. *Eur Respir J* 1993; 6(6): 797-802.
13. Wells AU, Rubens MB, du Bois RM, Hansell DM. Serial CT in fibrosing alveolitis: prognostic significance of the initial pattern. *AJR Am J Roentgenol* 1993; 161(6): 1159-1165.
14. Dujic Z, Eterovic D, Tocilj J, Andjelinovic D. Increase of pulmonary diffusing capacity in systemic sclerosis. *Br J Rheumatol* 1994; 33(5): 437-441.
15. Steen VD, Conte C, Owens GR, Medsger TA Jr. Severe restrictive lung disease in systemic sclerosis. *Arthritis Rheum* 1994; 37(9): 1283-1289.
16. Steen VD, Lanz JK Jr, Conte C, Owens GR, Medsger TA Jr. Therapy for severe interstitial lung disease in systemic sclerosis: a retrospective study. *Arthritis Rheum* 1994; 37(9): 1290-1296.

17. Tashkin DP, Clements PJ, Wright RS, Gong H Jr, Simmons MS, Lachenbruch PA, Furst DE. Interrelationships between pulmonary and extrapulmonary involvement in systemic sclerosis. A longitudinal analysis. *Chest* 1994; 105(2): 489-495.
18. Behr J, Adelman-Grill BC, Hein R, Beinert T, Schwaiblmair M, Krombach F, Fruhmann G. Pathogenetic and clinical significance of fibroblast activation in scleroderma lung disease. *Respiration* 1995; 62(4): 209-216.
19. Behr J, Vogelmeier C, Beinert T, Meurer T, Krombach F, Konig G, Fruhmann G. Bronchoalveolar lavage for evaluation and management of scleroderma disease of the lung. *Am J Respir Crit Care Med* 1996; 154(2): 400-406.
20. Jacobsen S, Halberg P, Ullman S, Hoier-Madsen M, Petersen J, Mortensen J, Wiik A. A longitudinal study of pulmonary function in Danish patients with systemic sclerosis. *Clin Rheumatol* 1997; 16(4): 384-390.
21. Greidinger EL, Flaherty KT, White B, Rosen A, Wigley FM, Wise RA. African-American race and antibodies to topoisomerase I are associated with increased severity of scleroderma lung disease. *Chest* 1998; 114(3): 801-807.
22. Atamas SP, Yurovsky VV, Wise R, Wigley FM, Goter Robinson CJ, Henry P, Alms WJ, White B. Production of type 2, cytokines by CD8+ lung cells is associated with greater decline in pulmonary function in patients with systemic sclerosis. *Arthritis Rheum* 1999; 42(6): 1168-1178.
23. Kon OM, Daniil Z, Black CM, du Bois RM. Clearance of inhaled technetium-99m-DTPA as a clinical index of pulmonary vascular disease in systemic sclerosis. *Eur Respir J* 1999; 13(1): 133-136.
24. Witt C, Borges AC, John M, Fietze I, Baumann G, Krause A. Pulmonary involvement in diffuse cutaneous systemic sclerosis: bronchoalveolar fluid granulocytosis predicts progression of fibrosing alveolitis. *Ann Rheum Dis* 1999; 58(10): 635-640.
25. White B, Moore WC, Wigley FM, Xiao, HQ, Wise RA. Cyclophosphamide is associated with pulmonary function and survival benefit in patients with scleroderma and alveolitis. *Ann Intern Med* 2000; 132(12): 947-954.
26. Yuhara T, Takemura H, Akama T, Yamane K, Sumida T. The relationship between serum immunoglobulin levels and pulmonary involvement in systemic sclerosis. *J Rheumatol* 2000; 27(5): 1207-1214.
27. Marie I, Dominique S, Levesque H, Ducrott P, Denis P, Hellot MF, Courtois H. Esophageal involvement and pulmonary manifestations in systemic sclerosis. *Arthritis Care Res (Hoboken)* 2001; 45(4): 346-354.
28. Scorza R, Caronni M, Mascagni B, Berruti V, Bazzi S, Micallef E, Arpaia G, Sardina M, Origgi L, Vanoli M. Effects of long-term cyclic iloprost therapy in systemic sclerosis with Raynaud's phenomenon. A randomized, controlled study. *Clin Exp Rheumatol* 2001; 19(5): 503-508.
29. Bouros D, Wells AU, Nicholson AG, Colby TV, Polychronopoulos V, Pantelidis P, Haslam PL, Vassilakis DA, Black CM, Du Bois RM. Histopathologic subsets of fibrosing alveolitis in patients with systemic sclerosis and their relationship to outcome. *Am J Respir Crit Care Med* 2002; 165(12): 1581-1586.
30. Giacomelli R, Valentini G, Salsano F, Cipriani P, Sambo P, Conforti M, Fulminis A, De Luca A, Farina G, Candela M, Generini S, De Francisci A, Tirri E, Proietti M, Bombardieri S, Gabrielli A, Toniatti G, Cerinic MM. Cyclophosphamide pulse regimen in the treatment of alveolitis in systemic sclerosis. *J Rheumatol* 2002; 29(4): 731-736.

31. Pakas I, Ioannidis JPA, Malagari K, Skopouli FN, Moutsopoulos HM, Vlachoyiannopoulos PG. Cyclophosphamide with low or high dose prednisolone for systemic sclerosis lung disease. *J Rheumatol* 2002; 29(2): 298-304.
32. Kowal-Bielecka O, Distler O, Kowal K, Siergiejko Z, Chwiecko J, Sulik A, Gay RE, Lukaszyk AB, Gay S, Sierakowski S. Elevated levels of leukotriene B4 and leukotriene E4 in bronchoalveolar lavage fluid from patients with scleroderma lung disease. *Arthritis Rheum* 2003; 48(6): 1639-1646.
33. Yanaba K, Hasegawa M, Hamaguchi Y, Fujimoto M, Takehara K, Sato S. Longitudinal analysis of serum KL-6 levels in patients with systemic sclerosis: association with the activity of pulmonary fibrosis. *Clin Exp Rheumatol* 2003; 21(4): 429-436.
34. Airo P, Danieli E, Parrinello G, Antonioli CM, Cavazzana I, Toniati P, Franceschini F, Cattaneo R. Intravenous cyclophosphamide therapy for systemic sclerosis. A single-center experience and review of the literature with pooled analysis of lung function test results. *Clin Exp Rheumatol* 2004; 22(5): 573-578.
35. Yanaba K, Hasegawa M, Takehara K, Sato S. Comparative study of serum surfactant protein-D and KL-6 concentrations in patients with systemic sclerosis as markers for monitoring the activity of pulmonary fibrosis. *J Rheumatol* 2004; 31(6): 1112-1120.
36. De Santis M, Bosello S, La Torre G, Capuano A, Tulusso B, Pagliari G, Pistelli R, Danza FM, Zoli A, Ferraccioli G. Functional, radiological and biological markers of alveolitis and infections of the lower respiratory tract in patients with systemic sclerosis. *Respir Res* 2005; 6(1): 96.
37. Koder M, Hasegawa M, Komura K, Yanaba K, Takehara K, Sato S. Serum pulmonary and activation-regulated chemokine/CCL18 levels in patients with systemic sclerosis: a sensitive indicator of active pulmonary fibrosis. *Arthritis Rheum* 2005; 52(9): 2889-2896.
38. Kowal-Bielecka O, Kowal K, Rojewska J, Bodzenta-Lukaszyk A, Siergiejko Z, Sierakowska M, Sierakowski S. Cyclophosphamide reduces neutrophilic alveolitis in patients with scleroderma lung disease: a retrospective analysis of serial bronchoalveolar lavage investigations. *Ann Rheum Dis* 2005; 64(9): 1343-1346.
39. Hoyles RK, Ellis RW, Wellsbury J, Lees B, Newlands P, Goh NSL, Roberts C, Desai S, Herrick AL, McHugh NJ, Foley NM, Pearson SB, Emery P, Veale DJ, Denton CP, Wells AU, Black CM, Du Bois RM. A multicenter, prospective, randomized, double-blind, placebo-controlled trial of corticosteroids and intravenous cyclophosphamide followed by oral azathioprine for the treatment of pulmonary fibrosis in scleroderma. *Arthritis Rheum* 2006; 54(12): 3962-3970.
40. Plastiras SC, Karadimitrakis SP, Ziakas PD, Vlachoyiannopoulos PG, Moutsopoulos HM, Tzelepis GE. Scleroderma lung: initial forced vital capacity as predictor of pulmonary function decline. *Arthritis Care Res (Hoboken)* 2006; 55(4): 598-602.
41. Tashkin DP, Elashoff R, Clements PJ, Goldin J, Roth MD, Furst DE, Arriola E, Silver R, Strange C, Bolster M, Seibold JR, Riley DJ, Hsu VM, Varga J, Schraufnagel DE, Theodore A, Simms R, Wise R, Wigley F, White B, Steen V, Read C, Mayes M, Parsley E, Mubarak K, Connolly MK, Golden J, Olman M, Fessler B, Rothfield N, Metersky M. Cyclophosphamide versus placebo in scleroderma lung disease. *N Engl J Med* 2006; 354(25): 2655-2666.
42. Beretta L, Bertolotti F, Cappiello F, Barili M, Masciocchi M, Toussoun K, Caronni M, Scorza R. Interleukin-1 gene complex polymorphisms in systemic sclerosis patients with severe restrictive lung physiology. *Hum Immunol* 2007; 68(7): 603-609.

43. Beretta L, Caronni M, Raimondi M, Ponti A, Viscuso T, Origgi L, Scorza R. Oral cyclophosphamide improves pulmonary function in scleroderma patients with fibrosing alveolitis: experience in one centre. *Clin Rheumatol* 2007; 26(2): 168-172.
44. Clements PJ, Roth MD, Elashoff R, Tashkin DP, Goldin J, Silver RM, Sterz M, Seibold JR, Schraufnagel D, Simms RW, Bolster M, Wise RA, Steen V, Mayes MD, Connelly K, Metersky M, Furst DE. Scleroderma lung study (SLS): differences in the presentation and course of patients with limited versus diffuse systemic sclerosis. *Ann Rheum Dis* 2007; 66(12): 1641-1647.
45. Goh NSL, Veeraraghavan S, Desai SR, Cramer D, Hansell DM, Denton CP, Black CM, Du Bois RM, Wells AU. Bronchoalveolar lavage cellular profiles in patients with systemic sclerosis-associated interstitial lung disease are not predictive of disease progression. *Arthritis Rheum* 2007; 56(6): 2005-2012.
46. Mittoo S, Wigley FM, Wise R, Xiao H, Hummers L. Persistence of abnormal bronchoalveolar lavage findings after cyclophosphamide treatment in scleroderma patients with interstitial lung disease. *Arthritis Rheum* 2007; 56(12): 4195-4202.
47. Tashkin DP, Elashoff R, Clements PJ, Roth MD, Furst DE, Silver RM, Goldin J, Arriola E, Strange C, Bolster MB, Seibold JR, Riley DJ, Hsu VM, Varga J, Schraufnagel D, Theodore A, Simms R, Wise R, Wigley F, White B, Steen V, Read C, Mayes M, Parsley E, Mubarak K, Connolly MK, Golden J, Olman M, Fessler B, Rothfield N, Metersky M, Khanna D, Li N, Li G. Effects of 1-year treatment with cyclophosphamide on outcomes at 2 years in scleroderma lung disease. *Am J Respir Crit Care Med* 2007; 176(10): 1026-1034.
48. Tzelepis GE, Plastiras SC, Karadimitrakis SP, Vlachoyiannopoulos PG. Determinants of pulmonary function improvement in patients with scleroderma and interstitial lung disease. *Clin Exp Rheumatol* 2007; 25(5): 734-739.
49. Berezne A, Ranque B, Valeyre D, Brauner M, Allanore Y, Launay D, Le Guern V, Kahn JE, Couderc LJ, Constans J, Cohen P, Mahr A, Pagnoux C, Hachulla E, Kahan A, Cabane J, Guillevin L, Mouthon L. Therapeutic strategy combining intravenous cyclophosphamide followed by oral azathioprine to treat worsening interstitial lung disease associated with systemic sclerosis: a retrospective multicenter open-label study. *J Rheumatol* 2008; 35(6): 1064-1072.
50. Boin F, De Fanis U, Bartlett SJ, Wigley FM, Rosen A, Casolaro V. T cell polarization identifies distinct clinical phenotypes in scleroderma lung disease. *Arthritis Rheum* 2008; 58(4): 1165-1174.
51. Goh NSL, Desai SR, Veeraraghavan S, Hansell DM, Copley SJ, Maher TM, Corte TJ, Sander CR, Ratoff J, Devaraj A, Bozovic G, Denton CP, Black CM, Du Bois RM, Wells AU. Interstitial lung disease in systemic sclerosis: a simple staging system. *Am J Respir Crit Care Med* 2008; 177(11): 1248-1254.
52. Strange C, Bolster MB, Roth MD, Silver RM, Theodore A, Goldin J, Clements P, Chung J, Elashoff RM, Suh R, Smith EA, Furst DE, Tashkin DP, Clements PJ, Elashoff R, Roth M, Furst D, Bulpitt K, Khanna D, Chung WLJ, Viasco S, Sterz M, Woolcock L, Yan X, Ho J, Vasunilashorn S, Da Costa I, Seibold JR, Riley DJ, Amorosa JK, Hsu VM, McCloskey DA, Wilson JE, Varga J, Schraufnagel D, Wilbur A, Lapota D, Arami S, Cole-Saffold P, Simms R, Clarke P, Korn J, Tobin K, Nuite M, Silver R, Bolster M, Schabel S, Smith E, Arnold J, Caldwell K, Bonner M, Wise R, Wigley F, White B, Hummers L, Bohlman M, Polito A, Leatherman G, Forbes E, Daniel M, Steen V, Read



- C, Cooper C, Wheaton S, Carey A, Ortiz A, Mayes M, Parsley E, Oldham S, Filemon T, Jordan S, Perry M, Connolly K, Golden J, Wolters P, Webb R, Davis J, Antolos C, Maynetto C, Rothfield N, Metersky M, Cobb R, Aberles M, Ingenito F, Breen E, Mubarak K, Granda JL, Silva J, Injic Z, Alexander R, Springmeyer S, Kirkland S, Molitor J, Hinke R, Mondt A, Olman M, Fessler B, Sanders C, Heck L, Parkhill T. Bronchoalveolar lavage and response to cyclophosphamide in scleroderma interstitial lung disease. *Am J Respir Crit Care Med* 2008; 177(1) :91-98.
53. Assassi S, Tan FK, McNearney TA, Estrada-Y-Martin R, Draeger HT, Anderson J, Arnett FC. The whole blood interferon score predicts progression of interstitial lung disease in systemic sclerosis [abstract]. *Arthritis Rheum* 2009; 60(Suppl.10): 443.
  54. De Souza RBC, Borges CTL, Capelozzi VL, Parra ER, Jatene FB, Kavakama J, Kairalla RA, Bonfa E. Centrilobular fibrosis: an underrecognized pattern in systemic sclerosis. *Respiration* 2009; 77(4): 389-397.
  55. Gordon J, Mersten J, Lyman S, Kloiber SA, Wildman HF, Crow MK, Kirou KA. Imatinib mesylate (Gleevec) in the treatment of systemic sclerosis: interim results of a phase IIa, one year, open label clinical trial [abstract]. *Arthritis Rheum* 2009; 60: 606.
  56. Khanna D, Tseng CH, Furst DE, Clements PJ, Elashoff R, Roth M, Elashoff D, Tashkin DP. Minimally important differences in the Mahler's Transition Dyspnoea Index in a large randomized controlled trial - results from the scleroderma lung study. *Rheumatology (Oxford)* 2009; 48(12): 1537-1540.
  57. Ottewell L, Walker K, Griffiths B. Long-term outcome of a targeted treatment regimen with IV cyclophosphamide (CYC) in patients with systemic sclerosis (SSC) and interstitial lung disease (ILD) [abstract]. *Rheumatology (Oxford)* 2009; 48 (Suppl.1): i76.
  58. Schmidt K, Martinez-Gamboa L, Meier S, Witt C, Meisel C, Hanitsch LG, Becker MO, Huscher D, Burmester GR, Riemekasten G. Bronchoalveolar lavage fluid cytokines and chemokines as markers and predictors for the outcome of interstitial lung disease in systemic sclerosis patients. *Arthritis Res Ther* 2009; 11(4): R111.
  59. Wanchu A, Suryanaryana BS, Sharma S, Sharma A, Bambery P. High-dose prednisolone and bolus cyclophosphamide in interstitial lung disease associated with systemic sclerosis: a prospective open study. *Int J Rheum Dis* 2009; 12(3): 239-242.
  60. Assassi S, Sharif R, Lasky RE, McNearney TA, Estrada-Y-Martin RM, Draeger H, Nair DK, Fritzler MJ, Reveille JD, Arnett FC, Mayes MD. Predictors of interstitial lung disease in early systemic sclerosis: a prospective longitudinal study of the GENISOS cohort. *Arthritis Res Ther* 2010; 12(5): R166.
  61. Boin F, Wigley F, Wise R, Rosen A. Circulating T cell polarization is associated with respiratory decline in scleroderma patients with active interstitial lung disease [abstract]. *Arthritis Rheum* 2010; 62(Suppl.10): 1989.
  62. Colaci M, Sebastiani M, Giuggioli D, Manfredi A, Spagnolo P, Luppi F, Richeldi L, Ferri C. Bronchoalveolar lavage and response to cyclophosphamide in scleroderma alveolitis. *Scand J Rheumatol* 2010; 39(2): 155-159.
  63. Cuomo G, Abignano G, Iudici M, Petrillo A, Valentini G. Mycophenolate mophetil in the treatment of systemic sclerosis-interstitial lung disease (SSc-ILD) in patients unresponsive to cyclophosphamide (CYC) [abstract]. *Clin Exp Rheumatol* 2010; 28(2): S167.

64. Gilson M, Zerkak D, Wipff J, Dusser D, Dinh-Xuan AT, Abitbol V, Chaussade S, Legmann P, Kahan A, Allanore Y. Prognostic factors for lung function in systemic sclerosis: prospective study of 105 cases. *Eur Respir J* 2010; 35(1): 112-117.
65. Mittoo S, Robinson D, Hudson M, Baron M. Predicting lung function decline in systemic sclerosis (SSC) [abstract]. *Ann Rheum Dis* 2010; 69(Suppl.2): A27.
66. Schorr M, Wise RA, Wigley FM, Hummers LK. Long-term outcome of patients with an isolated low diffusing capacity [abstract]. *Clin Exp Rheumatol* 2010; 28(5): S76.
67. Seibold JR, Denton CP, Furst DE, Guillevin L, Rubin LJ, Wells A, Matucci Cerinic M, Riemekasten G, Emery P, Chadha-Boreham H, Charef P, Roux S, Black CM. Randomized, prospective, placebo-controlled trial of bosentan in interstitial lung disease secondary to systemic sclerosis. *Arthritis Rheum* 2010; 62(7): 2101-2108.
68. Shahane A, Parambil J, Xu M, Chatterjee S. Scleroderma lung disease: effect of co-existent pulmonary hypertension on progression of interstitial lung disease [abstract]. *Arthritis Rheum* 2010; 62(Suppl.10): 592.
69. Steen VD, Domsic RT, Medsger T. Severe pulmonary fibrosis is uncommon in scleroderma patients with RNA polymerase 3 antibody [abstract]. *Arthritis Rheum* 2010; 62(Suppl.10): 1231.
70. Theodore AC, Simms RW, Lafyatis RA, Kissin EY, Merkel PA, Cruikshank WW, Little FF. A preliminary investigation of the predictive value and response to therapy with cyclophosphamide of interleukin-16 in bronchoalveolar lavage from patients with interstitial lung disease in systemic sclerosis [abstract]. *Clin Exp Rheumatol* 2010; 28(5): S78-S79.
71. Abhishek A, Yazdani R, Pearce F, Regan M, Lim K, Hubbard R, Lanyon P. Outcome of systemic sclerosis associated interstitial lung disease treated with intravenous cyclophosphamide. *Clin Rheumatol* 2011; 30(8): 1099-1104.
72. De Santis M, Inzitari R, Bosello SL, Peluso G, Fanali C, Iavarone F, Zizzo G, Bocci M, Cabras T, Messana I, Fuso L, Varone F, Pagliari G, Castagnola M, Ferraccioli G. Beta-thymosins and interstitial lung disease: study of a scleroderma cohort with a one-year follow-up. *Respir Res* 2011; 12(1): 22.
73. Espinosa G, Simeon CP, Plasin MA, Xaubet A, Munoz X, Fonollosa V, Cervera R, Vilardell M. Efficacy of cyclophosphamide in the treatment of interstitial lung disease associated with systemic sclerosis. *Arch Bronconeumol* 2011; 47(5): 239-245.
74. Goh NSL, Desai SR, Anagnostopoulos C, Hansell DM, Hoyles RK, Sato H, Denton CP, Black CM, Du Bois RM, Wells AU. Increased epithelial permeability in pulmonary fibrosis in relation to disease progression. *Eur Respir J* 2011; 38(1): 184-190.
75. Hasegawa M, Fujimoto M, Hamaguchi Y, Matsushita T, Inoue K, Sato S, Takehara K. Use of serum Clara cell 16-kDa (CC16) levels as a potential indicator of active pulmonary fibrosis in systemic sclerosis. *J Rheumatol* 2011; 38(5): 877-884.
76. Hoshino K, Satoh T, Kawaguchi Y, Kuwana M. Association of hepatocyte growth factor promoter polymorphism with severity of interstitial lung disease in Japanese patients with systemic sclerosis. *Arthritis Rheum* 2011; 63(8): 2465-2472.
77. Jayaweera S, Sahhar J, Englert H, Proudman S, Hill C, Youssef P. Mycophenolate mofetil (MMF) in scleroderma (SSC) associated interstitial lung disease (ILD) and skin disease – the Australian experience [abstract]. *Intern Med J* 2011; 41: 11.
78. Khanna D, Mayes MD, Abtin F, Clements PJ, Maranian P, Assassi S, Saggarr R, Singh RR, Furst DE. A one-year, phase I/IIa, open-label pilot trial of imatinib mesylate in the

- treatment of systemic sclerosis-associated active interstitial lung disease. *Arthritis Rheum* 2011; 63(11): 3540-3546.
79. Khanna D, Tseng CH, Farmani N, Steen V, Furst DE, Clements PJ, Roth MD, Goldin J, Elashoff R, Seibold JR, Sagar R, Tashkin DP. Clinical course of lung physiology in patients with scleroderma and interstitial lung disease: analysis of the Scleroderma Lung Study placebo group. *Arthritis Rheum* 2011; 63(10): 3078-3085.
  80. Mittoo S, Wigley FM, Wise RA, Woods A, Xiao H, Hummers LK. Long term effects of cyclophosphamide treatment on lung function and survival in scleroderma patients with interstitial lung disease. *Open Rheumatol J* 2011; 5(1): 1-6.
  81. Poormoghim H, Lakeh MM, Mohammadipour M, Talehy-Moineddin S, Sodagari F. Pulmonary survival study in 91 patients with systemic sclerosis. *Rheumatol Int* 2011; 31(12): 1577-1582.
  82. Rosato E, Rossi C, Molinaro I, Giovannetti A, Pisarri S, Salsano F. Long-term N-acetylcysteine therapy in systemic sclerosis interstitial lung disease: a retrospective study. *Int J Immunopathol Pharmacol* 2011; 24(3): 727-733.
  83. Roth MD, Tseng CH, Clements PJ, Furst DE, Tashkin DP, Goldin JG, Khanna D, Kleerup EC, Li N, Elashoff D, Elashoff RM. Predicting treatment outcomes and responder subsets in scleroderma-related interstitial lung disease. *Arthritis Rheum* 2011; 63(9): 2797-2808.
  84. Tiev KP, Hua-Huy T, Kettaneh A, Gain M, Duong-Quy S, Toledano C, Cabane J, Dinh-Xuan AT. Serum CC chemokine ligand-18 predicts lung disease worsening in systemic sclerosis. *Eur Respir J* 2011; 38(6): 1355-1360.
  85. Volpinari S, Corte RL, Bighi S, Ravenna F, Prandini N, Monaco AL, Trotta F. Bronchoalveolar lavage in systemic sclerosis with lung involvement: role and correlations with functional, radiological and scintigraphic parameters. *Rheumatol Int* 2011; 31(9): 1183-1188.
  86. Abignano G, Del Galdo F, Emery P, Buch M. Extended course cyclophosphamide and methylprednisolone pulse therapy can stabilize initially refractory interstitial lung disease in patients with SSc: a single-centre experience. *Rheumatology (Oxford)* 2012; 51: ii114.
  87. De Santis M, Bosello SL, Peluso G, Pinnelli M, Alivernini S, Zizzo G, Bocci M, Capacci A, La Torre G, Mannocci A, Pagliari G, Varone F, Pistelli R, Danza FM, Ferraccioli G. Bronchoalveolar lavage fluid and progression of scleroderma interstitial lung disease. *Clin Respir J* 2012; 6(1): 9-17.
  88. Hesselstrand R, Andreasson KA, Wuttge DM, Bozovic G, Scheja A, Saxne T. Increased serum COMP predicts mortality in ssc: results from a longitudinal study of interstitial lung disease. *Rheumatology (Oxford)* 2012; 51(5): 915-920.
  89. Kishore Babu KV, Srinivasa C, Sirisha K, Naidu ARK, Rajasekhar L, Suresh K, Shabina H, Prasad IRV. Outcome of immunosuppressive therapy in patients with scleroderma and interstitial lung disease, 2 years follow up data, a retrospective study [abstract]. *Indian J Rheumatol* 2012; 7: S27.
  90. Kuwana M, Kaburaki J. Natural history of pulmonary function in patients with SSc and interstitial lung disease [abstract]. *Rheumatology (Oxford)* 2012; 51: ii83-ii84.
  91. Kuwana M, Takeuchi T, Kaburaki J. Elevation of KL-6 at early disease course predicts subsequent deterioration of pulmonary function in patients with systemic sclerosis and interstitial lung disease [abstract]. *Arthritis Rheum* 2012; 64(Suppl.10): S371.

92. Le Gouellec N, Faivre JB, Hachulla AL, Hachulla E, Perez T, Morell-Dubois S, Hatron PY, Remy-Jardin M, Launay D. Prognosis factors for survival and progression-free survival in systemic sclerosis-associated interstitial lung disease [abstract]. *Ann Rheum Dis* 2012; 71(Suppl.3): 400.
93. Schupp J, Riemekasten G, Kollert C, Jager B, Muller-Quernheim J, Prasse A. CCL18 as marker of disease progression in systemic sclerosis [abstract]. *Eur Respir J* 2012; 40(Suppl.56): P692.
94. Sfriso P, Cozzi F, Oliviero F, Caso F, Cardarelli S, Facco M, Fitta C, Del Rosso A, Matucci-Cerinic M, Punzi L, Agostini C. CXCL11 in bronchoalveolar lavage fluid and pulmonary function decline in systemic sclerosis. *Clin Exp Rheumatol* 2012; 30(Suppl.71): S71-S75.
95. Soriano A, Margiotta D, Marigliano B, Alemanno P, Vadacca M, Afeltra A. Pulmonary fibrosis and connective tissue diseases: follow-up of lung involvement in rheumatoid arthritis and systemic sclerosis [abstract]. *Ann Rheum Dis* 2012; 71(Suppl.3): 343.
96. Tiev KP, Hua-Huy T, Kettaneh A, Allanore Y, Le-Dong NN, Duong-Quy S, Cabane J, Dinh-Xuan AT. Alveolar concentration of nitric oxide predicts pulmonary function deterioration in scleroderma. *Thorax* 2012; 67(2): 157-163.
97. Ananyeva L, Desinova O, Starovoytova M, Koneva O, Yutkina N, Onsyannikova O, Volkov A, Aleksandrova E. Rituximab for the treatment of systemic sclerosis associated interstitial lung disease: a case series [abstract]. *Ann Rheum Dis* 2013; 72(Suppl.3): 648.
98. Ando K, Motojima S, Doi T, Nagaoka T, Kaneko N, Aoshima M, Takahashi K. Effect of glucocorticoid monotherapy on pulmonary function and survival in Japanese patients with scleroderma-related interstitial lung disease. *Respir Investig* 2013; 51(2): 69-75.
99. Burt RK, Oliveira MC, Shah SJ, Moraes DA, Simoes B, Gheorghide M, Schroeder J, Ruderman E, Farge D, Chai ZJ, Marjanovic Z, Jain S, Morgan A, Milanetti F, Han X, Jovanovic B, Helenowski IB, Voltarelli J. Cardiac involvement and treatment-related mortality after non-myeloablative haemopoietic stem-cell transplantation with unselected autologous peripheral blood for patients with systemic sclerosis: a retrospective analysis. *Lancet* 2013; 381(9872): 1116-1124.
100. Celeste S, Santaniello A, Caronni M, Franchi J, Severino A, Scorza R, Beretta L. Carbohydrate antigen 15.3 as a serum biomarker of interstitial lung disease in systemic sclerosis patients. *Eur J Intern Med* 2013; 24(7): 671-676.
101. De Lauretis A, Sestini P, Pantelidis P, Hoyles R, Hansell DM, Goh NSL, Zappala CJ, Visca D, Maher TM, Denton CP, Ong VH, Abraham DJ, Kelleher P, Hector L, Wells AU, Renzoni EA. Serum interleukin 6 is predictive of early functional decline and mortality in interstitial lung disease associated with systemic sclerosis. *J Rheumatol* 2013; 40(4): 435-446.
102. Elhaj M, Charles J, Pedroza C, Liu X, Zhou X, Estrada-Y-Martin RM, Gonzalez EB, Lewis DE, Draeger HT, Kim S, Arnett FC, Mayes MD, Assassi S. Can serum surfactant protein D or CC-chemokine ligand 18 predict outcome of interstitial lung disease in patients with early systemic sclerosis? *J Rheumatol* 2013; 40(7): 1114-1120.
103. Enghelmayer JI, Giovini V, Altube S, Craviotto F, Cuenca E, Legarreta CG, Acuna S. Does the immunosuppressive therapy modify the pulmonary function parameters in interstitial lung disease (ILD) associated with scleroderma?: our experience [abstract]. *Am J Respir Crit Care Med* 2013; 187: A2919.

104. Koneva O, Ovsjannikova O, Ananjeva L, Lesnyak V. Isolated reduction of diffusing lung capacity in patients with systemic sclerosis (SSC): evaluation covering a 5 year period [abstract]. *Ann Rheum Dis* 2013; 72(Suppl.3): A651-A652.
105. Liu X, Mayes MD, Pedroza C, Draeger HT, Gonzalez EB, Harper BE, Reveille JD, Assassi S. Does C-reactive protein predict the long-term progression of interstitial lung disease and survival in patients with early systemic sclerosis? *Arthritis Care Res (Hoboken)* 2013; 65(8): 1375-1380.
106. Panopoulos ST, Bournia VK, Trakada G, Giavri I, Kostopoulos C, Sfrikakis PP. Mycophenolate versus cyclophosphamide for progressive interstitial lung disease associated with systemic sclerosis: a 2-year case control study. *Lung* 2013; 191(5): 483-489.
107. Radic M, Becker MO, Adler S, Schmidt K, Burmester GR, Riemekasten G. Cytokines in bronchoalveolar lavage fluid and serum predict deterioration of lung function and mortality in systemic sclerosis patients [abstract]. *Ann Rheum Dis* 2013; 72(Suppl.3): A501.
108. Stock CJ, Sato H, Fonseca C, Banya WAS, Molyneaux PL, Adamali H, Russell AM, Denton CP, Abraham DJ, Hansell DM, Nicholson AG, Maher TM, Wells AU, Lindahl GE, Renzoni EA. Mucin 5B promoter polymorphism is associated with idiopathic pulmonary fibrosis but not with development of lung fibrosis in systemic sclerosis or sarcoidosis. *Thorax* 2013; 68(5): 436-441.
109. Vacca A, Garau P, Porru G, Calvisi S, Ibba V, Piga M, Floris A, Cauli A, Mathieu A. Safety and efficacy of oral cyclophosphamide long-term therapy in systemic sclerosis: experience of a single-centre [abstract]. *Ann Rheum Dis* 2013; 72(Suppl.3): A503.
110. Wu M, Pedroza C, Salazar G, Zhou X, Reveille JD, Mayes MD, Assassi S. Plasma MCP-1 and IL-10 levels predict long-term progression of interstitial lung disease in patients with early systemic sclerosis [abstract]. *Arthritis Rheum* 2013; 65(Suppl.10): S742.
111. Zhang XJ, Bonner A, Hudson M, Baron M, Pope J. Association of gastroesophageal factors and worsening of forced vital capacity in systemic sclerosis. *J Rheumatol* 2013; 40(6): 850-858.
112. Ananyeva L, Ovsyannikova O, Lesnyak V, Koneva O, Desinova O, Starovoytova M. Slow progressive interstitial lung disease associated with systemic sclerosis: distinct disease phenotype [abstract]? *Ann Rheum Dis* 2014; 73(Suppl.2): 1013.
113. Chakr R, Gasparin A, Neves M, Rangel G, Hendler J, Moro AL, Zanchet D, Siqueira I, Hax V, Palominos P, Bredemeier M, Kohem C, Brenol C, Monticielo O, Brenol JCT, Xavier R. Long-term effectiveness and safety of cyclophosphamide in systemic sclerosis lung disease. *Ann Rheum Dis* 2014; 73(Suppl.2): 565-566.
114. Christmann RB, Sampaio-Barros P, Stifano G, Borges CL, De Carvalho CR, Kairalla R, Parra ER, Spira A, Simms R, Capellozzi VL, Lafyatis R. Association of interferon- and transforming growth factor beta-regulated genes and macrophage activation with systemic sclerosis-related progressive lung fibrosis. *Arthritis Rheumatol* 2014; 66(3): 714-725.
115. Cottrell TR, Wise RA, Wigley FM, Boin F. The degree of skin involvement identifies distinct lung disease outcomes and survival in systemic sclerosis. *Ann Rheum Dis* 2014; 73(6): 1060-1066.
116. Fraticelli P, Gabrielli B, Pomponio G, Valentini G, Bosello S, Riboldi P, Gerosa M, Faggioli P, Giacomelli R, Del Papa N, Gerli R, Lunardi C, Bombardieri S, Malorni W,

- Corvetta A, Moroncini G, Gabrielli A. Low-dose oral imatinib in the treatment of systemic sclerosis interstitial lung disease unresponsive to cyclophosphamide: a phase II pilot study. *Arthritis Res Ther* 2014; 16(4): R144.
117. Guillen-Del Castillo A, Pilar Simeon-Aznar C, Fonollosa-Pla V, Alonso-Vila S, Reverte-Vinaixa MM, Munoz X, Pallisa E, Selva-O'Callaghan A, Fernandez-Codina A, Vilardell-Tarres M. Good outcome of interstitial lung disease in patients with scleroderma associated to anti-PM/Scl antibody. *Semin Arthritis Rheum* 2014; 44(3): 331-337.
118. Hoffmann-Vold AM, Midtvedt O, Garen T, Lund MB, Aalokken TM, Gran JT, Molberg O. Moderate decline in forced vital capacity is associated with a poor outcome in systemic sclerosis patients. *Arthritis Rheumatol* 2014; 66(Suppl.10): S316-S317.
119. Kumanovics G, Gorbe E, Minier T, Simon D, Berki T, Czirjak L. Follow-up of serum KL-6 lung fibrosis biomarker levels in 173 patients with systemic sclerosis. *Clin Exp Rheumatol* 2014; 32(6Suppl.86): S138-S144.
120. Kwon HM, Kang EH, Go DJ, Park JK, Lee EY, Song YW, Lee HJ, Lee EB. Efficacy and safety of long term cyclophosphamide treatment for interstitial lung disease in systemic sclerosis [abstract]. *Ann Rheum Dis* 2014; 73(Suppl.2): 1011.
121. Lambrecht S, Smith V, De Wilde K, Coudenys J, Decuman S, Deforce D, De Keyser F, Elewaut D. Growth differentiation factor 15, a marker of lung involvement in systemic sclerosis, is involved in fibrosis development but is not indispensable for fibrosis development. *Arthritis Rheumatol* 2014; 66(2): 418-427.
122. Le Gouellec N, Duhamel A, Faivre JB, Guillaume L, Sobanski V, Perez T, Hachulla E, Hatron PY, Remy-Jardin M, Launay D. Prognostic factors of functional outcome in systemic sclerosis-associated interstitial lung disease [abstract]. *Ann Rheum Dis* 2014; 73(Suppl.2): 1008-1009.
123. Narvaez J, Sancho JJA, Castellvi I, Herrera S, Molina MM, Castillo D, De La Morena Barrio I, Villarino MR, Ferrer AM, Garcia DY, Pascual EV, L-Lobet JM, Latorre FG, Nolla JM. Long-term efficacy of rituximab in systemic sclerosis [abstract]. *Arthritis Rheumatol* 2014; 66(Suppl.10): S737.
124. Nihtyanova SI, Schreiber BE, Ong VH, Rosenberg D, Moinzadeh P, Coghlan JG, Wells AU, Denton CP. Prediction of pulmonary complications and long-term survival in systemic sclerosis. *Arthritis Rheumatol* 2014; 66(6): 1625-1635.
125. Parida J, Nath A, Neyaz Z, Agarwal V. A double blind randomized control trial of oral tadalafil in interstitial lung disease of scleroderma [abstract]. *Arthritis Rheumatol* 2014; 66(Suppl.10): S739.
126. Pham M, Griffing WL. Effects of mycophenolate mofetil on pulmonary lung function in interstitial lung disease of systemic sclerosis [abstract]. *Arthritis Rheumatol* 2014; 66(Suppl.10): S742.
127. Poormoghim H, Rezaei N, Sheidaie Z, Almasi AR, Moradi-Lakeh M, Almasi S, Andalib E. Systemic sclerosis: comparison of efficacy of oral cyclophosphamide and azathioprine on skin score and pulmonary involvement – a retrospective study. *Rheumatol Int* 2014; 34(12): 1691-1699.
128. Rotondo C, Praino E, Lanciano E, Fornaro M, Lopalco G, Nivuori MG, Iannone F, Lapadula G. Residual volume: a candidate as early marker of interstitial lung disease insystemic sclerosis patients [abstract]? *Clin Exp Rheumatol* 2014; 32(2): S83.
129. Ariani A, Silva M, Parisi S, Saracco M, Bravi E, De Gennaro F, Benini C, Caramaschi P, Lumetti F, Seletti V. Can quantitative chest CT predict interstitial lung disease worsening

- in systemic sclerosis? Results from a multi-centre prospective cohort study [abstract]. *Ann Rheum Dis* 2015; 74(Suppl.2): 587-588.
130. Balbir-Gurman A, Yigla M, Guralnik L, Hardak E, Solomonov A, Rozin AP, Toledano K, Dagan A, Bishara R, Markovits D, Nahir MA, Braun-Moscovici Y. Long-term follow-up of patients with scleroderma interstitial lung disease treated with intravenous cyclophosphamide pulse therapy: a single-center experience. *Isr Med Assoc J* 2015; 17(3): 150-156.
  131. Bosello SL, De Luca G, Rucco M, Berardi G, Falcione M, Danza FM, Pirroni T, Ferraccioli G. Long-term efficacy of B cell depletion therapy on lung and skin involvement in diffuse systemic sclerosis. *Semin Arthritis Rheum* 2015; 44(4): 428-436.
  132. De Luca G, Bosello SL, Berardi G, Rucco M, Canestrari G, Correria M, Mirone L, Forni F, Di Mario C, Danza FM, Pirroni T, Ferraccioli G. Tumour-associated antigens in systemic sclerosis patients with interstitial lung disease: association with lung involvement and cancer risk. *Rheumatology (Oxford)* 2015; 54(11): 1991-1999.
  133. Hoffmann-Vold AM, Aalokken TM, Lund MB, Garen T, Midtvedt O, Brunborg C, Gran JT, Molberg O. Predictive value of serial high-resolution computed tomography analyses and concurrent lung function tests in systemic sclerosis. *Arthritis Rheumatol* 2015; 67(8): 2205-2212.
  134. Iudici M, Cuomo G, Vettori S, Bocchino M, Sanduzzi Zamparelli A, Cappabianca S, Valentini G. Low-dose pulse cyclophosphamide in interstitial lung disease associated with systemic sclerosis (SSc-ILD): efficacy of maintenance immunosuppression in responders and non-responders. *Semin Arthritis Rheum* 2015; 44(4): 437-444.
  135. Jordan S, Distler JHW, Maurer B, Huscher D, Van Laar JM, Allanore Y, Distler O, Kvien TK, Airo P, Sancho JJA, Ananjeva L, Ancuta CM, Aringer M, Balbir-Gurman A, Cantatore FP, Caramaschi P, Chatelus E, Codullo V, Farge-Bancel D, Foti R, Gabrielli A, Henes J, Herrgott I, Iannone F, Ingegnoli F, Loyo E, Mattuci-Cerinic M, Mohamed WAAA, Muller-Ladner U, Palm O, Popa S, Riemekasten G, Rednic S, Rosato E, Saracco M, Scheja A, Smith V, Mihai C, Szucs G, Tomsic M, Valentini G, Walker UA, Westhovens R, Yavuz SK, Zenone T. Effects and safety of rituximab in systemic sclerosis: an analysis from the European Scleroderma Trial and Research (EUSTAR) group. *Ann Rheum Dis* 2015; 74(6): 1188-1194.
  136. Khanna D, Albera C, Fischer A, Seibold JR, Khalidi NA, Raghu G, Chung L, Schiopu E, Chen D, Gorina E. Safety and tolerability of pirfenidone in patients with systemic sclerosis interstitial lung disease [abstract]. *Arthritis Rheumatol* 2015; 67(Suppl.10): 816.
  137. Khanna D, Nagaraja V, Tseng CH, Abtin F, Suh R, Kim G, Wells A, Furst DE, Clements PJ, Roth MD, Tashkin DP, Goldin J. Predictors of lung function decline in scleroderma-related interstitial lung disease based on high-resolution computed tomography: implications for cohort enrichment in systemic sclerosis-associated interstitial lung disease trials. *Arthritis Res Ther* 2015; 17(1): 372.
  138. Koneva O, Desinova O, Ovsyannikova O, Starovoytova M, Glukchova S, Ananieva L. Impact of anti-B-cell therapy with rituximab on pulmonary function of the patients with systemic sclerosis and interstitial lung disease [abstract]. *Ann Rheum Dis* 2015; 74(Suppl.2): 603-604.
  139. Lepri G, Avouac J, Airo P, Anguita Santos F, Bellando Randone S, Blagojevic J, Distler O, Garcia Hernandez FJ, Gonzalez Nieto JA, Giuducci S, Jordan S, Limaye V, Maurer B, Riccieri V, Selva-O'Calaghan A, Mattuci Cerinic M, Allanore Y. Mid-term effects of

- rituximab in connective tissue disorders related interstitial lung disease (ILD) [abstract]. *Ann Rheum Dis* 2015; 74(Suppl.2): 1131.
140. Man A, Davidyock T, Ferguson LT, Jeong M, Zhang Y, Simms RW. Changes in forced vital capacity over time in systemic sclerosis: application of group-based trajectory modelling. *Rheumatology (Oxford)* 2015; 54(8): 1464-1471.
141. Mani M, Sriram S, Saranya S, Saravanan M, Euphrasia L, Sankaralingam R. Rituximab in systemic sclerosis with ILD-two year outcome from a tertiary care hospital in South India [abstract]. *Int J Rheum Dis* 2015; 18: 114.
142. Mateos-Toledo H, Sarmiento-Padilla G, Mejia M, Castillo-Pedroza J, Buendia-Roldan I, Estrada A, Vargas-Dominguez C, Rojas-Serrano J. Functional follow-up of diffuse interstitial lung disease (ILD) in phenotypes of systemic sclerosis (SSC) [abstract]. *Am J Respir Crit Care Med* 2015; 191: A1158.
143. Narvaez J, Heredia S, Panos HB, Armengol E, De Lama E, Narvaez JA. Is the presence of esophageal dilation a poor prognostic factor in dilated interstitial lung disease associated with systemic sclerosis [abstract]? *Arthritis Rheumatol* 2015; 67(Suppl.10): 2267-2268.
144. Ninaber MK, Stoilk J, Smit J, Le Roy EJ, Kroft LJM, Els Bakker M, De Vries Bouwstra JK, Schouffoer AA, Staring M, Stoel BC. Lung structure and function relation in systemic sclerosis: application of lung densitometry. *Eur J Radiol* 2015; 84(5): 975-979.
145. Radic M, Becker MO, Distler O, Huscher D, Riemekasten G. Does angiotensin and endothelin receptor blockade have an impact on lung function? An analysis from the EUSTAR data base [abstract]. *Ann Rheum Dis* 2015; 74(Suppl.2): 817.
146. Sakamoto N, Kakugawa T, Hara A, Nakashima S, Yura H, Harada T, Ishimoto H, Yatera K, Kuwatsuka Y, Hara T, Ichinose K, Obase Y, Ishimatsu Y, Kohno S, Mukae H. Association of elevated alpha-defensin levels with interstitial pneumonia in patients with systemic sclerosis. *Respir Res* 2015; 16: 148.
147. Saketkoo LA, Lammi MR, Fischer A, Molitor J, Steen VD. Mycophenolate mofetil (MMF) use in scleroderma patients with pulmonary hypertension: FVC, outcomes and survival-observations from the Pulmonary Hypertension Recognition and Outcomes in Scleroderma (PHAROS) cohort [abstract]. *Ann Rheum Dis* 2015; 74(Suppl.2): 820.
148. Schulam P, Ligon C, Wise R, Hummers LK, Wigley FM, Saria S. A computational tool for individualized prognosis of percent of predicted forced vital capacity trajectories in systemic sclerosis [abstract]. *Arthritis Rheumatol* 2015; 67(Suppl.10): 1123-1124.
149. Shirai Y, Takeuchi T, Kuwana M. Clinical utility of serial KL-6 measurement in interstitial lung disease associated with systemic sclerosis [abstract]. *Arthritis Rheumatol* 2015; 67(Suppl.10): 115.
150. Suliman YA, Dobrota R, Huscher D, Nguyen-Kim TDL, Maurer B, Jordan S, Speich R, Frauenfelder T, Distler O. Pulmonary function tests: high rate of false-negative results in the early detection and screening of scleroderma-related interstitial lung disease. *Arthritis Rheumatol* 2015; 67(12): 3256-3261.
151. Tanaseanu CM, Tiglea IA, Marta DS, Dumitrascu AL, Popescu M, Tanaseanu S, Moldoveanu E. Lactate dehydrogenase a possible marker of progressive microvasculopathy and interstitial lung disease in systemic sclerosis. *Acta Med Mediterr* 2015; 31(5): 941-946.
152. Tashkin D, Roth M, Clements P, Furst D, Khanna D, Goldin J, Kleerup E, Arriola E, Tseng CH, Elashoff R. Efficacy and safety of mycophenolate (MMF) vs oral



- cyclophosphamide (CYC) for treatment of scleroderma-interstitial lung disease (SscILD): results of scleroderma lung study II [abstract]. *Chest* 2015; 148(4): 637A-637B.
153. Volkmann E, Tashkin D, Li N, Furst D, Clements P, Elashoff R. Development of a composite outcome measure for systemic sclerosis related interstitial lung disease. *Rheumatology (Sunnyvale)* 2015; 5(2): 1000154.
  154. Volkmann ER, Tashkin DP, Roth M, Tseng CH, LeClair H, Clements PJ, Furst DE, Mayes MD, Charles J, Khanna D, Elashoff R, Assassi S. CXCL4 does not predict extent or progression of interstitial lung disease in systemic sclerosis [abstract]. *Arthritis Rheumatol* 2015; 67(Suppl.10): 1406-1407.
  155. Wallace B, Kafaja S, Furst DE, Berrocal VJ, Merkel PA, Seibold JR, Mayes MD, Khanna D. Reliability, validity and responsiveness to change of the Saint George's Respiratory Questionnaire in early diffuse cutaneous systemic sclerosis. *Rheumatology (Oxford)* 2015; 54(8): 1369-1379.
  156. Fava A, Cimbro R, Wigley FM, Liu QR, Rosen A, Boin F. Frequency of circulating topoisomerase-I-specific CD4 T cells predicts presence and progression of interstitial lung disease in scleroderma. *Arthritis Res Ther* 2016; 18(1): 99.
  157. Hoffmann-Vold AM, Tennoe AH, Garen T, Midtvedt O, Abraitte A, Aalokken TM, Lund MB, Brunborg C, Aukrust P, Ueland T, Molberg O. High level of chemokine CCL18 is associated with pulmonary function deterioration, lung fibrosis progression and reduced survival in systemic sclerosis. *Chest* 2016; 150(2): 299-306.
  158. Kloth C, Maximilian Thaiss W, Preibsch H, Mark K, Kotter I, Hetzel J, Nikolaou K, Henes J, Horger M. Quantitative chest computed tomography analysis in patients with systemic sclerosis before and after autologous stem cell transplantation: comparison of results with those of pulmonary function tests and clinical tests. *Rheumatology (Oxford)* 2016; 55(10): 1763-1770.
  159. Owen C, Ngian GS, Elford K, Moore O, Stevens W, Nikpour M, Rabusa C, Proudman S, Roddy J, Zochling J, Hill C, Sturgess A, Tymms K, Youssef P, Sahhar J. Mycophenolate mofetil is an effective and safe option for the management of systemic sclerosis-associated interstitial lung disease: results from the Australian Scleroderma Cohort Study. *Clin Exp Rheumatol* 2016; 34(5): 170-176.
  160. Shenoy PD, Bavaliya M, Sashidharan S, Nalianda K, Sreenath S. Cyclophosphamide versus mycophenolate mofetil in scleroderma interstitial lung disease (SSc-ILD) as induction therapy: a single-centre, retrospective analysis. *Arthritis Res Ther* 2016; 18(1): 123.
  161. ClinicalTrials.gov, NCT00319033. Open-label study with bosentan in interstitial lung disease. <http://clinicaltrials.gov/show/NCT00319033>. Date last updated: April 28 2015. Date last accessed: February 23 2017.
  162. World Health Organization International Clinical Trials Registration Platform, EUCTR2008-000224-27-GB. Systemic sclerosis associated interstitial lung disease: a longitudinal observational study assessing optimum treatment regimens. [https://www.clinicaltrialsregister.eu/ctr-search/search?query=eudract\\_number:2008-000224-27](https://www.clinicaltrialsregister.eu/ctr-search/search?query=eudract_number:2008-000224-27). Date last accessed: February 23 2017.
  163. ClinicalTrials.gov, NCT01570764. Intravenous cyclophosphamide for the treatment of systemic sclerosis associated interstitial lung disease. <https://clinicaltrials.gov/show/NCT01570764>. Date last updated: September 14 2016. Date last accessed February 23 2017.

164. ClinicalTrials.gov, NCT01559129. Study of pomalidomide (CC-4047) to evaluate safety, tolerability, pharmacokinetics, pharmacodynamics and effectiveness for subjects with systemic sclerosis with interstitial lung disease. <https://clinicaltrials.gov/show/NCT01559129>. Date last updated: April 5, 2017. Date last accessed February 23 2017.
165. ClinicalTrials.gov, NCT01858259. Treatment and prevention of progression of interstitial lung disease in systemic sclerosis. <http://clinicaltrials.gov/show/NCT01858259>. Date last updated: August 12 2014. Date last accessed: February 24 2017.
166. ClinicalTrials.gov, NCT02597933. A trial to compare nintedanib with placebo for patients with scleroderma related lung fibrosis. <https://clinicaltrials.gov/show/NCT02597933>. Date last updated: August 21 2017. Date last accessed: February 23 2017.
167. ClinicalTrials.gov, NCT02588625. A double-blinded study to evaluate the safety, tolerability, and efficacy of BMS-986020 versus placebo in diffuse cutaneous systemic sclerosis (dcSSc). <https://clinicaltrials.gov/show/NCT02588625>. Date last updated: July 20 2016. Date last accessed: February 23 2017.
168. ClinicalTrials.gov, NCT02370693. Comparing and combining bortezomib and mycophenolate in SSc pulmonary fibrosis. <https://clinicaltrials.gov/show/NCT02370693>. Date last updated: January 20 2017. Date last accessed: February 24 2017.
169. ClinicalTrials.gov, NCT02745145. Abituzumab in SSc-ILD. <https://clinicaltrials.gov/show/NCT02745145>. Date last updated: July 27 2017. Date last accessed: February 24 2017.
170. American Thoracic Society. Standardization of spirometry: 1987 update. *Am Rev Respir Dis* 1987; 136(5): 1285-1298.
171. American Thoracic Society. Lung function testing: selection of reference values and interpretative strategies. *Am Rev Respir Dis* 1991; 144(5): 1202-1218.
172. American Thoracic Society. Standardization of spirometry: 1994 update. *Am J Respir Crit Care Med* 1995; 152(3): 1107-1136.
173. Harrison NK, Myers AR, Corrin B, Soosay G, Dewar A, Black CM, Du Bois RM, Turner-Warwick M. Structural features of interstitial lung disease in systemic sclerosis. *Am Rev Respir Dis* 1991; 144(3): 706-713.
174. Wells AU, Hansell DM, Rubens MB, King AD, Cramer D, Black CM, Du Bois RM. Fibrosing alveolitis in systemic sclerosis: indices of lung function in relation to extent of disease on computed tomography. *Arthritis Rheum* 1997; 40(7): 1229-1236.
175. Wells AU, Rubens MB, Du Bois RM, Hansell DM. Functional impairment in fibrosing alveolitis: relationship to reversible disease on thin section computed tomography. *Eur Respir J* 1997; 10(2): 280-285.
176. Diot E, Boissinot E, Asquier E, Guilmot JL, Lemarie E, Valat C, Diot P. Relationship between abnormalities on high-resolution CT and pulmonary function in systemic sclerosis. *Chest* 1998; 114(6): 1623-1629.
177. Kim EA, Johkoh T, Lee KS, Ichikado K, Koh EM, Kim TS, Kim EY. Interstitial pneumonia in progressive systemic sclerosis: serial high-resolution CT findings with functional correlation. *J Comput Assist Tomogr* 2001; 25(5): 757-763.
178. Shahin AA, Sabri YY, Mostafa HA, Sabry EY, Hamid MA, Gamal H, Shahin HA. Pulmonary function tests, high-resolution computerized tomography, alpha-1 antitrypsin

- measurement, and early detection of pulmonary involvement in patients with systemic sclerosis. *Rheumatol Int* 2001; 20(3): 95-100.
179. Han S, Kim S, Kang Y. DLCO as a predictor of pulmonary fibrosis on high resolution CT in systemic sclerosis [abstract]. *Ann Rheum Dis* 2003; 62: 230.
180. Ooi GC, Mok MY, Tsang KW, Wong Y, Khong PL, Fung PC, Chan S, Tse HF, Wong RW, Lam WK, Lau CS. Interstitial lung disease in systemic sclerosis. *Acta Radiol* 2003; 44(3): 258-264.
181. Orlandi I, Camiciottoli G, Diciotti S, Bartolucci M, Cavigli E, Nacci F, Matucci-Cerinic M, Villari N, Mascalchi M. Thin-section and low-dose volumetric computed tomographic densitometry of the lung in systemic sclerosis. *J Comput Assist Tomogr* 2006; 30(5): 823-827.
182. Beretta L, Santaniello A, Lemos A, Masciocchi M, Scorza R. Validity of the Saint George's Respiratory Questionnaire in the evaluation of the health-related quality of life in patients with interstitial lung disease secondary to systemic sclerosis. *Rheumatology (Oxford)* 2007; 46(2): 296-301.
183. Camiciottoli G, Orlandi I, Bartolucci M, Meoni E, Nacci F, Diciotti S, Barcaroli C, Conforti ML, Pistolesi M, Matucci-Cerinic M, Masalchi M. Lung CT densitometry in systemic sclerosis: correlation with lung function, exercise testing, and quality of life. *Chest* 2007; 131(3): 672-681.
184. Goldin JG, Lynch DA, Stollo DC, Suh RD, Schraufnagel DE, Clements PJ, Elashoff RM, Furst DE, Vasunilashorn S, McNitt-Gray MF, Brown MS, Roth MD, Tashkin DP. High-resolution CT scan findings in patients with symptomatic scleroderma-related interstitial lung disease. *Chest* 2008; 134(2): 358-367.
185. Bellia M, Cannizzaro F, Scichilone N, Riili M, Triolo G, Midiri M, Lagalla R. HRCT and scleroderma: semiquantitative evaluation of lung damage and functional abnormalities. *Radiol Med* 2009; 114(2): 190-203.
186. Goldin J, Elashoff R, Kim HJ, Yan X, Lynch D, Stollo D, Roth MD, Clements P, Furst DE, Khanna D, Vasunilashorn S, Li G, Tashkin DP. Treatment of scleroderma-interstitial lung disease with cyclophosphamide is associated with less progressive fibrosis on serial thoracic high-resolution CT scan than placebo: findings from the scleroderma lung study. *Chest* 2009; 136(5): 1333-1340.
187. Vonk MC, Broers B, Heijdra YF, Ton E, Snijder R, van Dijk AP, van Laar JM, Bootsma H, van Hal PT, van den Hoogen FH, van Daele PL. Systemic sclerosis and its pulmonary complications in The Netherlands: an epidemiological study. *Ann Rheum Dis* 2009; 68(6): 961-965.
188. Ananyeva L, Teplova LV, Lesnyak VN, Starovojtova MN, Desinova OV, Nevskaya TA. Relationship between computed tomography and lung function parameters in patients with different duration of systemic sclerosis [abstract]. *Clin Exp Rheumatol* 2010; 28(2): S151.
189. Peng M, Xu W, Wang Q, Zhao J, Li M, Xu D, Hou Y, Zeng X. Pulmonary involvement in Chinese patients with SSc and correlations between the imaging and functional abnormalities [abstract]. *Clin Exp Rheumatol* 2010; 28(2): S150.
190. Kim H, Brown M, Abtin F, Lu P, Chong D, Goldin J. Association of texture-based quantitative fibrotic patterns and pulmonary function test in a new validation set [abstract]. *Eur Respir J* 2011; 38: 1440.

191. Kim HJ, Brown MS, Elashoff R, Li G, Gjertson DW, Lynch DA, Strollo DC, Kleerup E, Chong D, Shah SK, Ahmad S, Abtin F, Tashkin DP, Goldin JG. Quantitative texture-based assessment of one-year changes in fibrotic reticular patterns on HRCT in scleroderma lung disease treated with oral cyclophosphamide. *Eur Radiol* 2011; 21(12): 2455-2465.
192. Moghadam KG, Gharibdoost F, Parastandechehr G, Salehian P. Assessments of pulmonary involvement in patients with systemic sclerosis. *Arch Iran Med* 2011; 14(1): 22-26.
193. Parra ER, Oliveira e. Silva L, Rangel M, Capelozzi VL. Increase alpha-smooth muscle actin, telomerase, interleukin-4 and endothelin-1 expression in progressive pulmonary fibrosis of systemic sclerosis (SSc) [abstract]. *Virchows Archiv* 2011; 459: S144-S145.
194. Assayag D, Hudson M, Tatibouet S, Steele R, Hirsch A, Baron M. Clinical correlates of lung scan abnormalities in patients with systemic sclerosis-associated interstitial lung disease [abstract]. *Am J Respir Crit Care Med* 2012; 185: A6616.
195. Mantero M, Aliberti S, Erba G, Allevi E, Ricci M, Galbiati S, Dallari B, Sverzellati N, Pesci A, Pozzi M. Cytokines panel in exhaled breath condensate in SSc [abstract]. *Rheumatology (Oxford)* 2012; 51: ii69.
196. Mittal S, Kumar U, Guleria R, Seith Bhalla A, Mohan A, Mathur S, Sreenivas V. HRCT chest score and bronchoalveolar lavage fluid cytology in assessment of disease activity of systemic sclerosis associated interstitial lung disease [abstract]. *Indian J Rheumatol* 2012; 7: S5.
197. Pernot J, Puzenat E, Magy-Bertrand N, Manzoni P, Gondouin A, Bourdin H, Simon-Rigaud ML, Regnard J, Degano B. Detection of interstitial lung disease in systemic sclerosis through partitioning of lung transfer for carbon monoxide. *Respiration* 2012; 84(6): 461-468.
198. Perrin F, Chambellan A, Hardouin JB, Mourrain Langlois E, Neel A, Marseanu A, Planchon B, Hamidou M, Agard C. Membrane diffusion and capillary blood volume measurements in patients with SSc [abstract]. *Rheumatology (Oxford)* 2012; 51: ii71-ii72.
199. Wilsher M, Good N, Hopkins R, Young P, Milne D, Gibson A, Suppiah R, Ly J, Doughty R, Dalbeth N. The six-minute walk test using forehead oximetry is reliable in the assessment of scleroderma lung disease. *Respirology* 2012; 17(4): 647-652.
200. Zimmermann A, Pizzichini E, Nobre LF, Pizzichini MMM. Semiquantitative evaluation of high-resolution CT in SSc: preliminary applicability of a simple score in clinical practice [abstract]. *Rheumatology (Oxford)* 2012; 51: ii46-ii47.
201. Gatta G, Di Grezia G, Iacomino A, Russo A, Petrillo M, Feragalli B, Cappabianca S, Grassi R. HRCT in systemic sclerosis: correlation between respiratory functional indexes and extension of lung failure. *J Biol Regul Homeost Agents* 2013; 27(2): 579-587.
202. Nguyen-Kim TDL, Maurer Bm Suliman YA, Morsbach F, Distler O, Frauenfelder T. Histogram-based quantification of fibrosis in systemic sclerosis on sequential low dose HRCT of 9 CT slices [abstract]. *J Thorac Imaging* 2013; 28(5): W74-W75.
203. Piorunek T, Kuznar-Kaminska B, Cofta S, Batura-Gabryel H, Poplawski D, Majewski D, Puszczewicz M, Wysocka E. Lung impairment in scleroderma. In: Pokorski M, ed. *Respiratory Regulation – Clinical Advances*. New York, Springer, 2013; pp. 149-154.
204. Zamora FD, Kim HJ, Wang Q. Prevalence of pulmonary function test abnormalities and their correlation to high resolution computer tomography in a large scleroderma population [abstract]. *Am J Respir Crit Care Med* 2013; 187: A2920.

205. Colaci M, Sebastiani M, Manfredi A, Giuggioli D, Cassone G, Manzini CU, Ghizzoni C, Cerri S, Ferri C. Lung involvement in systemic sclerosis: role of high resolution computed tomography and its relationship with other pulmonary and clinico-serological features. *J Biol Regul Homeost Agents* 2014; 28(3): 481-488.
206. Ariani A, Silva M, Bravi E, Saracco M, Parisi S, De Gennaro F, Lumetti F, Idolazzi L, Seletti V, Caramaschi P, Benini C, Bodini FC, Scire CA, Lucchini G, Santilli D, Mozzani F, Imberti D, Arrigoni E, Delsante G, Pellerito R, Fusaro E, Sverzellati N. Operator-independent quantitative chest computed tomography versus standard assessment of interstitial lung disease related to systemic sclerosis: a multi-centric study. *Mod Rheumatol* 2015; 25(5): 724-730.
207. Bernstein EJ, Berrocal VJ, Steen VD, Shanmugam VK, Shah AA, Hinchcliff ME, Hant FN, Gordon JK, Frech TM, Domsic RT, Assassi S, Khanna D. The predictive value of pulmonary function tests to diagnose interstitial lung disease in adults with early diffuse cutaneous systemic sclerosis [abstract]. *Arthritis Rheumatol* 2015; 67(Suppl.10): 2268-2269.
208. Ghandour AM, Gamal RM, Seifeldein GS, Galal MMM, El-Hakeim EM. MDCT staging of disease extent in patients with systemic sclerosis: a pilot study [abstract]. *Ann Rheum Dis* 2015; 74(Suppl.2): 601-602.
209. Guarnieri G, Zanatta E, Mason P, Scarpa MC, Pigatto E, Maestrelli P, Cozzi F. Determinants of impairment in lung diffusing capacity in patients with systemic sclerosis. *Clin Exp Rheumatol* 2015; 33(4Suppl.91): S80-S86.
210. Kim HJG, Tashkin DP, Brown MS, Kleerup EC, Goldin JG. Systemic sclerosis interstitial lung disease evaluation: comparison between two quantitative computed tomography for the change assessments [abstract]. *Am J Respir Crit Care Med* 2015; 191: A1161.
211. Salaffi F, Carotti M, Bosello S, Ciapetti A, Gutierrez M, Bichisecchi E, Giuseppetti G, Ferraccioli G. Computer-aided quantification of interstitial lung disease from high resolution computed tomography images in systemic sclerosis: correlation with visual reader-based score and physiologic tests. *Biomed Res Int* 2015; 834262.
212. Antoniou KM, Margaritopoulos GA, Goh NS, Karagiannis K, Desai SR, Nicholson AG, Siafakas NM, Coghlan JG, Denton CP, Hansell DM, Wells AU. Combined pulmonary fibrosis and emphysema in scleroderma-related lung disease has a major confounding effect on lung physiology and screening for pulmonary hypertension. *Arthritis Rheumatol* 2016; 68(4): 1004-1012.
213. Cetincakmak MG, Goya C, Hamidi C, Tekbas G, Abakay O, Batmaz I, Hattapoglu S, Yavuz A, Bilici A. Quantitative volumetric assessment of pulmonary involvement in patients with systemic sclerosis. *Quant Imaging Med Surg* 2016; 6(1): 50-56.
214. Salaffi F, Carotti M, Di Donato E, Di Carlo M, Ceccarelli L, Giuseppetti G. Computer-aided tomographic analysis of interstitial lung disease (ILD) in patients with systemic sclerosis (SSc). Correlation with pulmonary physiologic tests and patient-centred measures of perceived dyspnea and functional disability. *PLoS One* 2016; 11(3): e0149240.
215. Tashkin DP, Volkmann ER, Tseng CH, Kim HJ, Goldin J, Clements P, Furst D, Khanna D, Kleerup E, Roth MD, Elashoff R. Relationship between quantitative radiographic assessments of interstitial lung disease and physiological and clinical features of systemic sclerosis. *Ann Rheum Dis* 2016; 75(2): 374-381.
